# Supplementary material for: Wireless technology is an environmental stressor requiring new understanding and approaches in health care
Source: Front Public Health. 2022 Dec 20;10:986315. doi: 10.3389/fpubh.2022.986315 (PMC9809975; doi:10.3389/fpubh.2022.986315)
Supplement: Supplementary file 1 [file Data_Sheet_1.xlsx]

## Sheet: Notes
Notes:
These spreadsheets are summaries of data retrieved from the ORSAA Database on Electromagnetic Bioeffects (ODEB)
https://www.orsaa.org/orsaa-database.html
Experimental UHF contains all in vitro and in vivo experimental papers in the range 300 kHz to 300 GHz
Epidemiology UHF contains all in epidemiological papers in the range 300 kHz to 300 GHz
For each of these lists, the number of effects and no effects papers is summed for various categories using excel formulas; e.g. 'waveform not stated' in the experimental list is counted for effects, no effects and uncertain effects
Real vs Epidemiology graph uses the counts of effects and no effects from the two lists (experimental and epidemiology) to create a comparison graph.
Effects categories graph uses the categorised data from Supplement 2, to graph the number of experimental effect papers contained in each of ODEB's biological and health categories,that use real-world signals for experimental exposures

## Sheet: Experimental UHF
PaperID	Title	Authors	Date_Pub	Effect	Exposure::WaveType	Mobile phone / WiFi signals	Oxidative Stress Yes-=1	Exposure::SignalGen	WLink	Freq_Cat	Funding	InVitro	InVivo
1	Low intensity microwave radiation induced oxidative stress, inflammatory response and DNA damage in rat brain	Megha K, Deshmukh PS, Banerjee BD, Tripathi AK, Ahmed R, Abegaonkar MP.	2015-10-25	Effect	Not Stated		1	RF Signal Generator and Transverse Electromagnetic (TEM) Cell	http://www.ncbi.nlm.nih.gov/pubmed/26511840	UHF (300 MHz-3 GHz) studies	Indian Council of Medical Research (ICMR)	0	1
2	Exposure to 915 MHz radiation induces micronuclei in Vicia faba root tips	Gustavino B, Carboni G, Petrillo R, Paoluzzi G, Santovetti E, Rizzoni M.	2016-03-01	Effect	Continuous			Transverse Electromagnetic (TEM) Cell	http://www.emf-portal.de/viewer.php?l=e&aid=28074	UHF (300 MHz-3 GHz) studies	No Conflict of Interest Stated	1	0
4	Influence of electromagnetic field (1800 MHz) on lipid peroxidation in brain, blood, liver and kidney in rats	Bodera P, Stankiewicz W, Antkowiak B, Paluch M, Kieliszek J, Sobiech J, Niemcewicz M.	2015-06-01	Effect	Pulsed		1	Microwave	http://www.emf-portal.de/viewer.php?l=e&aid=27635	UHF (300 MHz-3 GHz) studies	Not Stated	0	1
5	Protective effect of Liuweidihuang Pills against cellphone electromagnetic radiation-induced histomorphological abnormality, oxidative injury, and cell apoptosis in rat testes	Ma HR, Cao XH, Ma XL, Chen JJ, Chen JW, Yang H, Liu YX.	2015-08-02	Effect	Not Stated		1	Not Stated	http://www.ncbi.nlm.nih.gov/pubmed/26442304?dopt=Abstract	UHF (300 MHz-3 GHz) studies	Not Known	0	1
6	Effect of 900 MHz Electromagnetic Radiation on the Induction of ROS in Human Peripheral Blood Mononuclear Cells	Kazemi E, Mortazavi SM, Ali-Ghanbari A, Sharifzadeh S, Ranjbaran R, Mostafavi-Pour Z, Zal F, Haghani M.	2015-09-01	Effect	Pulsed		1	Microwave	http://www.emf-portal.de/viewer.php?aid=27903&l=e	UHF (300 MHz-3 GHz) studies	Not Stated	0	1
7	Maternal exposure to a continuous 900-MHz electromagnetic field provokes neuronal loss and pathological changes in cerebellum of 32-day-old female rat offspring	Odacı E, Hancı H, İkinci A, Sönmez OF, Aslan A, Şahin A, Kaya H, Çolakoğlu S, Baş O.	2015-09-20	Effect	Pulsed			Microwave	http://www.ncbi.nlm.nih.gov/pubmed/26391347?dopt=Abstract	UHF (300 MHz-3 GHz) studies	No Conflict of Interest Stated	0	1
8	8-oxoG DNA Glycosylase-1 Inhibition Sensitizes Neuro-2a Cells to Oxidative DNA Base Damage Induced by 900 MHz Radiofrequency Electromagnetic Radiation	Wang X, Liu C, Ma Q, Feng W, Yang L, Lu Y, Zhou Z, Yu Z, Li W, Zhang L	2015-09-25	Effect	Pulsed	Simulated	1	Mobile Phone GSM (Talk) Simulated	https://www.emf-portal.org/en/article/27920	UHF (300 MHz-3 GHz) studies	National Basic Research Program of China. National Natural Science Foundation (NSFC), China	1	0
10	Impact of mobile phone radiation on the quality and DNA methylation of human sperm in vitro	Wang D, Li B, Liu Y, Ma YF, Chen SQ, Sun HJ, Dong J, Ma XH, Zhou J, Wang XH.	2015-06-21	Effect	Pulsed	Real	1	Mobile Phone	http://www.ncbi.nlm.nih.gov/pubmed/26242041?dopt=Abstract	UHF (300 MHz-3 GHz) studies	Not Known	1	0
11	Electromagnetic radiation at 900 MHz induces sperm apoptosis through bcl-2, bax and caspase-3 signalling pathways in rats	Liu Q, Si T, Xu X, Liang F, Wang L, Pan S.	2015-08-04	Effect	Amplitude Modulation		1	RF Signal Generator	http://www.ncbi.nlm.nih.gov/pubmed/26239320?dopt=Abstract	UHF (300 MHz-3 GHz) studies	China National citrus industry technology system program	0	1
14	The Effects of Melatonin on Oxidative Stress Parameters and DNA Fragmentation in Testicular Tissue of Rats Exposed to Microwave Radiation	Sokolovic D, Djordjevic B, Kocic G, Stoimenov TJ, Stanojkovic Z, Sokolovic DM, Veljkovic A, Ristic G, Despotovic M, Milisavljevic D, Jankovic R, Binic I.	2015-06-24	Effect	Pulsed	Real	1	Mobile Phone GSM	http://www.emf-portal.de/viewer.php?aid=28061&l=e	UHF (300 MHz-3 GHz) studies	This work was supported by the Ministry of Science and Technological Development,	0	1
15	Effects of Wi-Fi (2.45 GHz) Exposure on Apoptosis, Sperm Parameters and Testicular Histomorphometry in Rats: A Time Course Study	Shokri S, Soltani A, Kazemi M, Sardari D, Mofrad FB.	2015-07-11	Effect	Pulsed			WiFi	https://www.ncbi.nlm.nih.gov/pmc/articles/PMC4503846/	UHF (300 MHz-3 GHz) studies	Vice Chancellor of Zanjan University of Medical Sciences and Science and Research Branch of Islamic Azad University of Tehran.	0	1
17	Effect of Mobile Phone Radiation on Cardiovascular Development of Chick Embryo	Ye W, Wang F, Zhang W, Fang N, Zhao W, Wang J.	2015-07-14	Effect	Pulsed			Mobile Phone GSM	http://www.ncbi.nlm.nih.gov/pubmed/26171674?dopt=Abstract	UHF (300 MHz-3 GHz) studies	Chinese Educational Department Key Laboratory of Magnetism and Magnetic Materials of Lanzhou University	0	1
18	Possible cause for altered spatial cognition of prepubescent rats exposed to chronic radiofrequency electromagnetic radiation	Narayanan SN, Kumar RS, Karun KM, Nayak SB, Bhat PG.	2015-05-22	Effect	Pulsed	Real		Mobile Phone	http://www.emf-portal.de/viewer.php?aid=27297&l=e	UHF (300 MHz-3 GHz) studies	Medical Research Council - Country	0	1
19	In vitro effect of cell phone radiation on motility, DNA fragmentation and clusterin gene expression in human sperm	Zalata A, El-Samanoudy AZ, Shaalan D, El-Baiomy Y, Mostafa T.	2015-04-21	Effect	Pulsed	Real		Mobile Phone	http://www.emf-portal.de/viewer.php?aid=26969&l=e	UHF (300 MHz-3 GHz) studies	No Conflict of Interest Stated	1	0
21	Effects of chronic exposure to 2G and 3G cell phone radiation on mice testis – a randomised controlled trial	Mugunthan N, J. Anbalagan, A. Shanmuga Samy, S. Rajanarayanan, S. Meenachi	2015-02-01	Effect	Pulsed	Real		Mobile Phone	https://www.emf-portal.org/en/article/26886	UHF (300 MHz-3 GHz) studies	Mahatma Gandhi Medical College and Research Institute, P	0	1
22	Effects of chronic exposure to electromagnetic waves on the auditory system.	Ozgur A, Tumkaya L, Terzi S, Kalkan Y, Erdivanli OC, Dursun E	2015-04-02	Effect	Continuous			RF Signal Generator	http://www.ncbi.nlm.nih.gov/pubmed/25836770?dopt=Abstract	UHF (300 MHz-3 GHz) studies	University funded	0	1
23	Effect of Low-Intensity Microwave Radiation on Monoamine Neurotransmitters and Their Key Regulating Enzymes in Rat Brain	Megha K, Deshmukh PS, Ravi AK, Tripathi AK, Abegaonkar MP, Banerjee BD.	2015-02-12	Effect	Not Stated			Simulated by a signal generator	http://www.emf-portal.de/viewer.php?l=e&aid=26521	UHF (300 MHz-3 GHz) studies	Indian Council of Medical Research (ICMR)	0	1
24	Oxidative stress induced by 1.8 GHz radio frequency electromagnetic radiation and effects of garlic extract in rats	Avci B, Akar A, Bilgici B, Tunçel ÖK.	2012-08-08	Effect	Pulsed		1	Simulated by a signal generator	https://www.ncbi.nlm.nih.gov/pubmed/22788526	UHF (300 MHz-3 GHz) studies	Ondokuz Mayis University Research Fund	0	1
25	Cognitive Impairment and Neurogenotoxic Effects in Rats Exposed to Low-Intensity Microwave Radiation	Deshmukh PS, Nasare N, Megha K, Banerjee BD, Ahmed RS, Singh D, Abegaonkar MP, Tripathi AK, Mediratta PK.	2015-03-05	Effect	Not Stated			RF Signal Generator and Gigahertz Transverse Electromagnetic (GTEM) Cell	http://www.ncbi.nlm.nih.gov/pubmed/25749756	UHF (300 MHz-3 GHz) studies	Indian Council of Medical Research (ICMR), New Delhi for the grant; in the form of the Extramural Research Project	0	1
26	Exposure to a 900 MHz electromagnetic field for 1 hour a day over 30 days does change the histopathology and biochemistry of the rat testis	Odacı E, Ozyılmaz C.	2015-03-19	Effect	Not Stated		1	RF Signal Generator	http://www.emf-portal.de/viewer.php?l=e&aid=26694	UHF (300 MHz-3 GHz) studies	Not Stated	0	1
28	Effect of Short-term 900 MHz low level electromagnetic radiation exposure on blood serotonin and glutamate levels	Eris AH, Kiziltan HS, Meral I, Genc H, Trabzon M, Seyithanoglu H, Yagci B, Uysal O.	2015-06-01	Effect	Continuous			Microwave Signal Generator	https://www.emf-portal.org/en/article/26509	UHF (300 MHz-3 GHz) studies	Bezmialem Vakif University, Turkey	0	1
30	Investigation of the effects of distance from sources on apoptosis, oxidative stress and cytosolic calcium accumulation via TRPV1 channels induced by mobile phones and Wi-Fi in breast cancer cells	Cig B, Naziroglu M.	2015-02-19	Effect	Pulsed	Simulated	1	Mobile Phone Simulated	http://www.emf-portal.de/viewer.php?aid=26606&l=e	UHF (300 MHz-3 GHz) studies	University funded	1	0
35	The effect of exposure of rats during prenatal period to radiation spreading from mobile phones on renal development	Bedir R, Tumkaya L, Şehitoğlu İ, Kalkan Y, Yilmaz A, Şahin OZ.	2015-03-01	Effect	Pulsed			Microwave	http://www.ncbi.nlm.nih.gov/pubmed/25691088	UHF (300 MHz-3 GHz) studies	National Natural Science Foundation	0	1
39	Protective role of sesame oil against mobile base station-induced oxidative stress	Marzook EM, Abd El Moneim AE, Elhadary AA.	2014-07-01	Effect	Pulsed	Real	1	Mobile Phone Base Station	http://www.emf-portal.de/viewer.php?l=e&aid=23921	UHF (300 MHz-3 GHz) studies	The Egyptian Society of Radiation Sciences and Applications	0	1
41	The effect of 2100 MHz radiofrequency radiation of a 3G mobile phone on the parotid gland of rats	Aydogan F, Unlu I, Aydin E, Yumusak N, Devrim E, Samim EE, Ozgur E, Unsal V, Tomruk A, Ozturk GG, Seyhan N.	2014-07-30	Effect	Pulsed			Microwave	http://www.emf-portal.de/viewer.php?aid=26166&l=e	UHF (300 MHz-3 GHz) studies	University funded	0	1
44	Effect of electromagnetic irradiation produced by 3G mobile phone on male rat reproductive system in a simulated scenario	Kumar S, Nirala JP, Behari J, Paulraj R.	2014-09-01	Effect	Pulsed	Real	1	Mobile Phone	https://www.ncbi.nlm.nih.gov/pubmed/25241589	UHF (300 MHz-3 GHz) studies	Indian Council for Medical Research (ICMR)	0	1
46	Evaluation of oxidant stress and antioxidant defence in discrete brain regions of rats exposed to 900 MHz radiation	Narayanan SN, Kumar RS, Kedage V, Nalini K, Nayak S, Bhat PG.	2014-01-01	Effect	Pulsed	Real	1	Mobile Phone	https://www.ncbi.nlm.nih.gov/pubmed/25174055	UHF (300 MHz-3 GHz) studies	Indian Council of Medical Research (ICMR), India	0	1
47	The effects of prenatal exposure to a 900-MHz electromagnetic field on the 21-day-old male rat heart.	Turedi S, Hancı H, Topal Z, Ünal D, Mercantepe T, Bozkurt İ, Kaya H, Odacı E.	2014-08-28	Effect	Continuous		1	Microwave	http://www.emf-portal.de/viewer.php?aid=25683&l=e	UHF (300 MHz-3 GHz) studies	Not Stated	0	1
48	Pathological effects of prenatal exposure to a 900 MHz electromagnetic field on the 21-day-old male rat kidney	Odacı E, Ünal D, Mercantepe T, Topal Z, Hancı H, Türedi S, Erol HS, Mungan S, Kaya H, Çolakoğlu S.	2014-08-27	Effect	Continuous		1	Microwave	http://www.ncbi.nlm.nih.gov/pubmed/25158858?dopt=Abstract	UHF (300 MHz-3 GHz) studies	No Conflict of Interest Stated	0	1
49	The effect of prenatal exposure to 900-megahertz electromagnetic field on the, 21-old-day rat testicle	Hanci H, Odaci E, Kaya H, Aliyazicioglu Y, Turan I, Demir S, Colakoglu S.	2013-12-01	Effect	Continuous		1	Microwave	http://www.ncbi.nlm.nih.gov/pubmed/24095929?dopt=Abstract	UHF (300 MHz-3 GHz) studies	Not Stated	0	1
51	Effects of microwaves (950 MHZ mobile phone) on morphometric and apoptotic changes of rabbit epididymis	Azadi Oskouyi E, Rajaei F, Safari Variani A, Sarokhani MR, Javadi A.	2014-07-25	Effect	Pulsed			Simulated by a signal generator	http://www.ncbi.nlm.nih.gov/pubmed/25060044?dopt=Abstract	UHF (300 MHz-3 GHz) studies	This study was supported by a grant from the Qazvin University of Medical Sciences.	0	1
52	Selenium reduces mobile phone (900 MHz)-induced oxidative stress, mitochondrial function, and apoptosis in breast cancer cells	Kahya MC, Nazıroğlu M, Çiğ B.	2014-06-27	Effect	Pulsed		1	Simulated by a signal generator	http://www.ncbi.nlm.nih.gov/pubmed/24965080?dopt=Abstract	UHF (300 MHz-3 GHz) studies	Unit of Scientific Research Project (BAP), İzmir Katip Çelebi University, Turkey (Project Number: BAP: 2013-2-TSBP-09).	1	0
53	Effects of mobile phone radiation (900 MHz radiofrequency) on structure and functions of rat brain	Saikhedkar N, Bhatnagar M, Jain A, Sukhwal P, Sharma C, Jaiswal N.	2014-12-01	Effect	Pulsed	Real	1	Mobile Phone	http://www.emf-portal.de/viewer.php?aid=24987&l=e	UHF (300 MHz-3 GHz) studies	University Grants Commission	0	1
54	Biochemical Modifications and Neuronal Damage in Brain of Young and Adult Rats After long-term Exposure to Mobile Phone Radiations	Motawi TK, Darwish HA, Moustafa YM, Labib MM.	2014-12-01	Effect	Pulsed	Real	1	Mobile Phone GSM	http://www.ncbi.nlm.nih.gov/pubmed/24801773?dopt=Abstract	UHF (300 MHz-3 GHz) studies	University funded. No conflict of interest stated.	0	1
55	Cell oxidation-reduction imbalance after modulated radiofrequency radiation	Marjanovic AM, Pavicic I, Trosic I.	2015-08-28	Effect	Not Stated		1	Signal Generator	http://www.ncbi.nlm.nih.gov/pubmed/25119294	UHF (300 MHz-3 GHz) studies	Ministry of Science, Education and Sports, Republic of Croatia	1	0
56	The influence of direct mobile phone radiation on sperm quality	Gorpinchenko I, Nikitin O, Banyra O, Shulyak A.	2014-04-17	Effect	Pulsed	Real		Mobile Phone	http://www.emf-portal.de/viewer.php?l=e&aid=25254	UHF (300 MHz-3 GHz) studies	Not Stated	1	0
57	The effect of radiofrequency radiation generated by a Global System for Mobile Communications source on cochlear development in a rat model	Seckin E, Suren Basar F, Atmaca S, Kaymaz FF, Suzer A, Akar A, Sunan E, Koyuncu M.	2014-05-01	Effect	Not Stated			Simulated by a signal generator	http://www.ncbi.nlm.nih.gov/pubmed/24784924?dopt=Abstract	UHF (300 MHz-3 GHz) studies	Not Stated	0	1
58	Effect of exposure and withdrawal of 900-MHz-electromagnetic waves on brain, kidney and liver oxidative stress and some biochemical parameters in male rats	Ragy MM.	2015-12-01	Effect	Continuous		1	Microwave	http://www.emf-portal.de/viewer.php?aid=24632&l=e	UHF (300 MHz-3 GHz) studies	No Conflict of Interest Stated	0	1
59	Oxidative changes and apoptosis induced by 1800-MHz electromagnetic radiation in NIH/3T3 cells	Hou Q, Wang M, Wu S, Ma X, An G, Liu H, Xie F.	2015-03-25	Effect	Pulsed		1	Simulated by a signal generator	http://www.emf-portal.de/viewer.php?aid=24552&l=e	UHF (300 MHz-3 GHz) studies	Government Agencies	1	0
60	Maternal mobile phone exposure alters intrinsic electrophysiological properties of CA1 pyramidal neurons in rat offspring	Razavinasab M, Moazzami K, Shabani M.	2014-03-06	Effect	Pulsed			Microwave	http://www.emf-portal.de/viewer.php?aid=24398&l=e	UHF (300 MHz-3 GHz) studies	University Grant	0	1
61	Spatial learning, monoamines and oxidative stress in rats exposed to 900MHz electromagnetic field in combination with iron overload	Maaroufi K, Had-Aissouni L, Melon C, Sakly M, Abdelmelek H, Poucet B, Save E	2014-01-01	Effect	Not Stated		1	Microwave Signal Generator	http://www.ncbi.nlm.nih.gov/pubmed/24144546?dopt=Abstract	UHF (300 MHz-3 GHz) studies	Funding was provided by the CNRS and Aix-Marseille University	0	1
62	Study of Oxidative Stress in Human Lens Epithelial Cells Exposed to 1.8 GHz Radiofrequency Fields	Ni S, Yu Y, Zhang Y, Wu W, Lai K, Yao K.	2013-08-26	Effect	Pulsed		1	Simulated by a signal generator	http://www.ncbi.nlm.nih.gov/pubmed/23991100?dopt=Abstract	UHF (300 MHz-3 GHz) studies	Zhejiang Key Laboratory Fund of China, Zhejiang Key Innovation Team Project of China, Program for the Platform Health Talents of the Health Bureau of Zhejiang Province, Qianjiang Talent Program of Zhejiang Province, National Nature Science Foundation of China	1	0
63	Mobile phone radiation induces mode-dependent DNA damage in a mouse spermatocyte-derived cell line: a protective role of melatonin	Liu C, Gao P, Xu SC, Wang Y, Chen CH, He MD, Yu ZP, Zhang L, Zhou Z.	2013-09-03	Effect	Pulsed	Real		Mobile Phone	http://www.ncbi.nlm.nih.gov/pubmed/23952262?dopt=Abstract	UHF (300 MHz-3 GHz) studies	National Basic Research Program of China; National Natural Science Foundation of China	1	0
64	Circadian alterations of reproductive functional markers in male rats exposed to 1800 MHz radiofrequency field	Qin F, Zhang J, Cao H, Guo W, Chen L, Shen O, Sun J, Yi C, Li J, Wang J, Tong J.	2013-11-01	Effect	Continuous			RF Signal Generator and a GHz Transverse Electro Magnetic (GTEM) chamber	http://www.ncbi.nlm.nih.gov/pubmed/24117058	UHF (300 MHz-3 GHz) studies	This study was funded by the 973 project grant from China Ministry of Science and Technology (2011CB503705 and 2012CB947600), the National Natural Science Foundation of China (81020108028, 81001257 and 81302463), the interdisciplinary pre-research project of Soochow University (Biological electromagnetic spectrum measurement and feature extraction), the Priority Academic Program Development of Ji…	0	1
65	Investigation of the Effects of 2.1 GHz Microwave Radiation on Mitochondrial Membrane Potential (ΔΨ m), Apoptotic Activity and Cell Viability in Human Breast Fibroblast Cells	Esmekaya MA, Seyhan N, Kayhan H, Tuysuz MZ, Kurşun AC, Yağcı M.	2013-12-01	Effect	Continuous			Simulated by a signal generator	http://www.ncbi.nlm.nih.gov/pubmed/23723005?dopt=Abstract	UHF (300 MHz-3 GHz) studies	University funded	1	0
66	Evaluation of the cytogenotoxic damage in immature and mature rats exposed to 900 MHz radiofrequency electromagnetic fields	Sekeroglu Z, Akar A, Şekeroğlu V.	2013-11-01	Effect	Continuous	Simulated		Mobile Phone Simulated	http://www.emf-portal.de/viewer.php?sform=&fb=yes&aid=22646&l=e	UHF (300 MHz-3 GHz) studies	No Conflict of Interest Stated	0	1
68	Effects of intensive cell phone (philips genic 900) use on the rat kidney tissue	Koca O, Gökçe AM, Öztürk MI, Ercan F, Yurdakul N, Karaman MI.	2013-06-27	Effect	Pulsed	Real		Mobile Phone	http://www.emf-portal.de/viewer.php?aid=22941&l=e	UHF (300 MHz-3 GHz) studies	Not Stated	0	1
69	Effect of 950 MHz UHF Electromagnetic radiation on biomarkers of oxidative damage, metabolism of UFA and antioxidants in the liver of young rats of different ages	Furtado-Filho OV, Borba JB, Dallegrave A, Pizzolato TM, Henriques JA, Moreira JC, Saffi J.	2014-02-01	Effect	Continuous			Simulated by a signal generator	http://www.emf-portal.de/viewer.php?l=e&aid=22969	UHF (300 MHz-3 GHz) studies	University funded	0	1
70	Detection of Low Level Microwave Radiation Induced Deoxyribonucleic Acid Damage Vis-à-vis Genotoxicity in Brain of Fischer Rats	Deshmukh PS, Megha K, Banerjee BD, Ahmed RS, Chandna S, Abegaonkar MP, Tripathi AK.	2013-01-01	Effect	Continuous			RF Signal Generator	http://www.emf-portal.de/viewer.php?aid=22984&l=e	UHF (300 MHz-3 GHz) studies	Medical Research Council - Country	0	1
71	Stimulation of the brain with radiofrequency electromagnetic field pulses affects sleep-dependent performance improvement negatively	Lustenberger C, Murbach M, Dürr R, Schmid MR, Kuster N, Achermann P, Huber R.	2013-02-24	Effect	Pulsed			Microwave	http://www.ncbi.nlm.nih.gov/pubmed/23482083?dopt=Abstract	UHF (300 MHz-3 GHz) studies	Funded by Swiss Research Foundation on Mobile Communication (FSM) and the Swiss National Science Foundation. The five founders of FSM are: ETH Zurich, Swisscom, Salt, Sunrise, 3G Mobile (liquidated in 2011).	0	1
72	The effect of pulsed electromagnetic radiation from mobile phone on the levels of monoamine neurotransmitters in four different areas of rat brain	Aboul Ezz HS, Khadrawy YA, Ahmed NA, Radwan NM, El Bakry MM.	2013-07-01	Effect	Pulsed			Microwave	http://www.emf-portal.de/viewer.php?l=e&aid=23112	UHF (300 MHz-3 GHz) studies	Granted by Sector of “International Cooperation with USA”, Foreign Ministry, Egypt.	0	1
73	Exposure to 1800 MHz radiofrequency electromagnetic radiation induces oxidative DNA base damage in a mouse spermatocyte-derived cell line	Liu C, Duan W, Xu S, Chen C, He M, Zhang L, Yu Z, Zhou Z.	2013-01-18	Effect	Pulsed	Simulated	1	Mobile Phone GSM Simulated	http://www.emf-portal.de/viewer.php?l=e&aid=21674	UHF (300 MHz-3 GHz) studies	National Basic Research Program of China; National Natural Science Foundation of China	1	0
74	Effect of 900 MHz radiofrequency radiation on oxidative stress in rat brain and serum	Bilgici B, Akar A, Avci B, Tuncel OK.	2013-03-09	Effect	Pulsed		1	Simulated by a signal generator	https://www.ncbi.nlm.nih.gov/pubmed/23301880	UHF (300 MHz-3 GHz) studies	roject Management Office grant PYO.TIP.1901.09.018 from the Ondokuz Mayis University	0	1
75	Effect of 3G Cell Phone Exposure with Computer Controlled 2-D Stepper Motor on Non-thermal Activation of the hsp27/p38MAPK Stress Pathway in Rat Brain	Kesari KK, Meena R, Nirala J, Kumar J, Verma HN.	2014-03-01	Effect	Pulsed	Real	1	Mobile Phone UMTS	http://www.ncbi.nlm.nih.gov/pubmed/23949848	UHF (300 MHz-3 GHz) studies	Council for Scientific and Industrial Research	0	1
76	Effect Of Microwave Radiation On The Retina Of Mice Embryos	Amer FI, El Shabaka HA, Zakaria I, Mohammed HA.	2013-01-04	Effect	Not Stated		1	Microwave	http://www.emf-portal.de/viewer.php?l=e&aid=23338	UHF (300 MHz-3 GHz) studies	Not Stated	0	1
78	The toxic effects of mobile phone radiofrequency (940 MHz) on the structure of calf thymus DNA	Hekmat A, Saboury AA, Moosavi-Movahedi AA.	2013-02-01	Effect	Not Stated			Simulated by a signal generator	http://www.emf-portal.de/viewer.php?l=e&aid=21475	UHF (300 MHz-3 GHz) studies	University funded	1	0
79	Overproduction of free radical species in embryonal cells exposed to low intensity radiofrequency radiation	Burlaka A, Tsybulin O, Sidorik E, Lukin S, Polishuk V, Tsehmistrenko S, Yakymenko I	2013-09-01	Effect	Pulsed	Real	1	Mobile Phone GSM	http://www.ncbi.nlm.nih.gov/pubmed/24084462?dopt=Abstract	UHF (300 MHz-3 GHz) studies	National Academy of Sciences	0	1
80	The protective effect of autophagy on mouse spermatocyte derived cells exposure to 1800MHz radiofrequency electromagnetic radiation	Liu K, Zhang G, Wang Z, Liu Y, Dong J, Dong X, Liu J, Cao J, Ao L, Zhang S	2014-08-04	Effect	Pulsed	Simulated	1	Mobile Phone GSM (Talk) Simulated	http://www.ncbi.nlm.nih.gov/pubmed/24813634?dopt=Abstract	UHF (300 MHz-3 GHz) studies	This study was funded by National Basic Research Program (973Program) (No. 2011CB503705). Authors affiliated with the Military - Third Military Medical University No conflict of Interest stated	1	0
81	Male reproductive health under threat: Short term exposure to radiofrequency radiation's emitted by common mobile jammers	Mortazavi S, Parsanezhad M, Kazempour M, Ghahramani P, Mortazavi A, Davari M.	2013-04-06	Effect	Not Stated			Mobile Phone Jammer	http://www.ncbi.nlm.nih.gov/pubmed/24082653?dopt=Abstract	UHF (300 MHz-3 GHz) studies	The Center for Research on Ionizing and Non-ionizing Radiation, Shiraz University of Medical Sciences.	1	0
82	The effects of mobile phones on apoptosis in cerebral tissue: an experimental study on rats	Yilmaz A, Yilmaz N, Serarslan Y, Aras M, Altas M, Özgür T, Sefil F.	2014-09-01	Effect	Pulsed	Real		Mobile Phone	http://www.ncbi.nlm.nih.gov/pubmed/24763879?dopt=Abstract	UHF (300 MHz-3 GHz) studies	University Grant	0	1
83	Effect of mobile phone use on salivary concentrations of protein, amylase, lipase, immunoglobulin A, lysozyme, lactoferrin, peroxidase and C-reactive protein of the parotid gland	Hashemipour MS, Yarbakht M, Gholamhosseinian A, Famori H.	2014-05-01	Effect	Pulsed	Real		Mobile Phone	http://www.ncbi.nlm.nih.gov/pubmed/24739140?dopt=Abstract	UHF (300 MHz-3 GHz) studies	University funded	0	1
84	Cell type-dependent induction of DNA damage by 1800 MHz radiofrequency electromagnetic fields does not result in significant cellular dysfunctions	Xu S, Chen G, Chen C, Sun C, Zhang D, Murbach M, Kuster N, Zeng Q, Xu Z.	2013-01-23	Effect	Pulsed	Simulated		Mobile Phone GSM Simulated	http://www.ncbi.nlm.nih.gov/pubmed/23355902?dopt=Abstract	UHF (300 MHz-3 GHz) studies	This work was supported by grants from the Ministry of Science and Technology (2011CB503702), the Natural Science Foundation of China (81102094&30872082), the Natural Science Foundation of Zhejiang Province (5Y205458), the Research Fund for the Doctoral Program of Higher Education of China (20110101120100), and the Fundamental Research Funds for the Central Universities of China (2011QNA7018, 201…	1	0
85	GSM 900 MHz cellular phone radiation can either stimulate or depress early embryogenesis in Japanese quails depending on the duration of exposure	Tsybulin O, Sidorik E, Brieieva O, Buchynska L, Kyrylenko S, Henshel D, Yakymenko I.	2013-05-13	Effect	Pulsed	Real		Mobile Phone GSM	http://www.emf-portal.de/viewer.php?l=e&aid=22134	UHF (300 MHz-3 GHz) studies	European Union (EU)	0	1
86	Transient and cumulative memory impairments induced by GSM 1.8 GHz cell phone signal in a mouse model	Ntzouni MP, Skouroliakou A, Kostomitsopoulos N, Margaritis LH.	2013-03-01	Effect	Pulsed			Microwave	http://www.emf-portal.de/viewer.php?aid=21645&l=e	UHF (300 MHz-3 GHz) studies	European Union (EU)	0	1
88	Differential Pro-Inflammatory Responses of Astrocytes and Microglia Involve STAT3 Activation in Response to 1800 MHz Radiofrequency Fields	Lu Y, He M, Zhang Y, Xu S, Zhang L, He Y, Chen C, Liu C, Pi H, Yu Z, Zhou Z	2014-10-01	Effect	Pulsed			Simulated by a signal generator	http://www.emf-portal.de/viewer.php?aid=25822&l=e	UHF (300 MHz-3 GHz) studies	National Basic Research Program - Country	1	0
89	Exposure to 1800 MHz radiofrequency radiation impairs neurite outgrowth of embryonic neural stem cells	Chen C, Ma Q, Liu C, Deng P, Zhu G, Zhang L, He M, Lu Y, Duan W, Pei L, Li M, Yu Z, Zhou Z.	2014-05-01	Effect	Pulsed			Simulated by a signal generator	http://www.emf-portal.de/viewer.php?l=e&aid=25033	UHF (300 MHz-3 GHz) studies	National Natural Science Foundation	1	0
90	Non- thermal continuous and modulated electromagnetic radiation fields effects on sleep EEG of rats	Mohammed HS, Fahmy HM, Radwan NM, Elsayed AA.	2012-06-25	Effect	Pulsed			Simulated by a signal generator	http://www.ncbi.nlm.nih.gov/pubmed/25685416	UHF (300 MHz-3 GHz) studies	Mixture of University and Government funding	0	1
92	Effect of long-term exposure of 2.4 GHz radiofrequency radiation emitted from Wi-Fi equipment on testes functions	Dasdag S, Taş M, Akdag MZ, Yegin K.	2015-03-01	Effect	Continuous	Simulated		WiFi Simulated	http://www.emf-portal.de/viewer.php?aid=24182&l=e	UHF (300 MHz-3 GHz) studies	No Conflict of Interest Stated	0	1
93	Effects of acute exposure to WIFI signals (2.45 GHz) on heart variability and blood pressure in Albinos rabbit	Saili L, Hanini A, Smirani C, Azzouz I, Azzouz A, Sakly M, Abdelmelek H, Bouslama Z.	2015-09-02	Effect	Pulsed	Real		WiFi	http://www.ncbi.nlm.nih.gov/pubmed/26356390?dopt=Abstract	UHF (300 MHz-3 GHz) studies	Not Provided	0	1
94	Impact of 2.45 GHz microwave radiation on the testicular inflammatory pathway biomarkers in young rats: The role of gallic acid	Saygin M, Asci H, Ozmen O, Cankara FN, Dincoglu D, Ilhan I.	2015-08-13	Effect	Pulsed		1	RF Signal Generator	http://www.ncbi.nlm.nih.gov/pubmed/26268881	UHF (300 MHz-3 GHz) studies	No Conflict of Interest Stated Authors declared there was no source of funding for this research. Institution Selected as authors are attached to Universities.	0	1
95	EMF radiation at 2450 MHz triggers changes in the morphology and expression of heat shock proteins and glucocorticoid receptors in rat thymus	Misa-Agustiño MJ, Leiro-Vidal JM, Gomez-Amoza JL, Jorge-Mora MT, Jorge-Barreiro FJ, Salas-Sánchez AA, Ares-Pena FJ, López-Martín E.	2015-04-12	Effect	Not Stated			RF Signal Generator and Gigahertz TEM Cell	http://www.ncbi.nlm.nih.gov/pubmed/25731700?dopt=Abstract	UHF (300 MHz-3 GHz) studies	Governrment Department of Commence Agency	0	1
96	Effects of 2.4 Ghz radiofrequency radiation emitted from wi-fi equipment on microRNA expression in brain tissue	Dasdag S, Akdag MZ, Erdal ME, Erdal N, Ay OI, Ay ME, Yilmaz SG, Tasdelen B, Yegin K.	2015-03-16	Effect	Pulsed	Simulated		WiFi Simulated	http://www.ncbi.nlm.nih.gov/pubmed/25775055?dopt=Abstract	UHF (300 MHz-3 GHz) studies	No Conflict of Interest Stated	0	1
97	Structural and ultrastructural study of rat liver influenced by electromagnetic radiation	Holovska K, Almasiova V, Cigankova V, Benova K, Racekova E, Martoncikova M.	2014-10-17	Effect	Pulsed			RF Signal Generator	http://www.emf-portal.de/viewer.php?l=e&aid=26611	UHF (300 MHz-3 GHz) studies	Scientific Grants Agency - Country	0	1
98	Experimental analysis of HSP 90 and 70 in-vivo changes induced in the thyroid by exposure to microwave electromagnetic fields	Agustiño, M.J, Leiro, J.M., Jorge Mora, M.T, Rodriguez-Gonzalez, J.A	2012-07-14	Effect	Not Stated			RF Signal Generator	https://www.emf-portal.org/en/article/26617	UHF (300 MHz-3 GHz) studies	Not Stated	0	1
99	Exposure to non-ionizing radiation provokes changes in rat thyroid morphology and expression of HSP-90	Misa-Agustiño MJ, Jorge-Mora T, Jorge-Barreiro FJ, Suarez-Quintanilla J, Moreno-Piquero E, Ares-Pena FJ, López-Martín E.	2015-09-01	Effect	Not Stated			Diathermy	http://www.ncbi.nlm.nih.gov/pubmed/25649190?dopt=Abstract	UHF (300 MHz-3 GHz) studies	Governrment Department of Commence Agency	0	1
100	Radiofrequency electromagnetic field exposure effects on antioxidant enzymes and liver function tests	Kumari K, Ramovatar M, Kumar S, Paulraj R, Verma NH, Kavindra Kumar K	2012-09-09	Effect	Pulsed		1	Microwave Oven	http://www.emf-portal.de/viewer.php?l=e&aid=26267	UHF (300 MHz-3 GHz) studies	Council of Scientific and Industrial Research (CSIR), New Delhi, India	0	1
101	Increased DNA oxidation (8-OHdG) and protein oxidation (AOPP) by Low level electromagnetic field (2.45 GHz) in rat brain and protective effect of garlic	Gurler HS, Bilgici B, Akar AK, Tomak L, Bedir A.	2014-10-01	Effect	Pulsed		1	RF Signal Generator	http://www.emf-portal.de/viewer.php?aid=24955&l=e	UHF (300 MHz-3 GHz) studies	University Grant	0	1
102	Structural and ultrastructural study of rat testes influenced by electromagnetic radiation	Almasiova V, Holovská K, Cigánková V, Račeková E, Fabianová K, Martončíková M.	2015-05-01	Effect	Pulsed			RF Signal Generator	http://www.ncbi.nlm.nih.gov/pubmed/24839928	UHF (300 MHz-3 GHz) studies	This work was supported by a grant of the Ministery of Education, Science, Research, and Sport of the Slovak Republic, VEGA 1/0037/12.	0	1
103	Electromagnetic radiation (Wi-Fi) and epilepsy induce calcium entry and apoptosis through activation of TRPV1 channel in hippocampus and dorsal root ganglion of rats	Ghazizadeh V, Nazıroğlu M.	2014-09-01	Effect	Pulsed	Simulated	1	WiFi simulated	http://www.emf-portal.de/viewer.php?aid=24789&l=e	UHF (300 MHz-3 GHz) studies	Scientific Society	1	0
104	Effects of olive leave extract on metabolic disorders and oxidative stress induced by 2.45 GHz WIFI signals	Salah MB, Abdelmelek H, Abderraba M	2013-11-01	Effect	Pulsed	real	1	WiFi	https://www.emf-portal.org/en/article/23421	UHF (300 MHz-3 GHz) studies	Not Stated	0	1
105	The effects of long-term exposure to a 2450 MHz electromagnetic field on growth and pubertal development in female Wistar rats	Sangun O, Dundar B, Darici H, Comlekci S, Doguc DK, Celik S.	2015-03-01	Effect	Pulsed		1	Simulated by a signal generator	http://www.emf-portal.de/viewer.php?l=e&aid=24187	UHF (300 MHz-3 GHz) studies	No Conflict of Interest Stated	0	1
106	Wi-Fi (2.45 GHz)- and Mobile Phone (900 and 1800 MHz)-Induced Risks on Oxidative Stress and Elements in Kidney and Testis of Rats During Pregnancy and the Development of Offspring	Ozorak A, Naziroglu M, Celik O, Yuksel M, Ozcelik D, Ozkaya MO, Cetin H, Kahya MC, Kose SA	2013-09-24	Effect	Pulsed		1	RF Signal Generator	http://www.emf-portal.de/viewer.php?l=e&aid=23656	UHF (300 MHz-3 GHz) studies	Not Stated	0	1
107	Exposure to 835 MHz radiofrequency electromagnetic field induces autophagy in hippocampus but not in brain stem of mice	Kim JH, Yu DH, Kim HJ, Huh YH, Cho SW, Lee JK, Kim HG, Kim HR	2017-11-22	Effect	Continuous			Transverse Electromagnetic (TEM) Cell	https://www.ncbi.nlm.nih.gov/pubmed/29166827	UHF (300 MHz-3 GHz) studies	Basic Science Research Program through the National Research Foundation of Korea (NRF) funded by the Ministry of Science, ICT, and Future Planning	0	1
108	Use of laptop computers connected to internet through Wi-Fi decreases human sperm motility and increases sperm DNA fragmentation	Avendano C, Mata A, Sanchez Sarmiento CA, Doncel GF.	2011-11-23	Effect	Pulsed	Real		WiFi	http://www.ncbi.nlm.nih.gov/pubmed/22112647	UHF (300 MHz-3 GHz) studies	Not Stated	1	0
141	Non-invasive radiofrequency treatment effect on mitochondria in pancreatic cancer cells	Curley SA, Palalon F, Lu X, Koshkina NV.	2014-11-01	Effect	Not Stated		1	Radio Frequency	http://www.ncbi.nlm.nih.gov/pubmed/24986120?dopt=Abstract	UHF (300 MHz-3 GHz) studies	Not Provided	1	0
143	MicroRNAs: Novel Mechanism Involved in the Pathogenesis of Microwave Exposure on Rats' Hippocampus	Zhao L, Sun C, Xiong L, Yang Y, Gao Y, Wang L, Zuo H, Xu X, Dong J, Zhou H, Peng R.	2014-04-22	Effect	Pulsed			Microwave	http://www.ncbi.nlm.nih.gov/pubmed/24748327?dopt=Abstract	UHF (300 MHz-3 GHz) studies	No Conflict of Interest Stated	0	1
144	Microwave-Induced Structural and Functional Injury of Hippocampal and PC12 Cells Is Accompanied by Abnormal Changes in the NMDAR-PSD95-CaMKII Pathway	Wang LF, Wei L, Qiao SM, Gao XN, Gao YB, Wang SM, Zhao L, Dong J, Xu XP, Zhou HM, Hu XJ, Peng RY.	2015-08-25	Effect	Pulsed			Microwave	http://www.ncbi.nlm.nih.gov/pubmed/26337368?dopt=Abstract	UHF (300 MHz-3 GHz) studies	National Natural Science Foundation	1	0
145	Alterations of cognitive function and 5-HT system in rats after long term microwave exposure	Li HJ, Peng RY, Wang CZ, Qiao SM, Yong Z, Gao YB, Xu XP, Wang SX, Dong J, Zuo HY, Li Z, Zhou HM, Wang LF, Hu XJ.	2014-12-24	Effect	Pulsed			Microwave Generator	http://www.emf-portal.de/viewer.php?aid=26303&l=e	UHF (300 MHz-3 GHz) studies	No Conflict of Interest Stated	0	1
146	Effects of Pulsed 2.856 GHz Microwave Exposure on BM-MSCs Isolated from C57BL/6 Mice	Wang C, Wang X, Zhou H, Dong G, Guan X, Wang L, Xu X, Wang S, Chen P, Peng R, Hu X.	2015-02-06	Effect	Pulsed			Microwave	http://www.ncbi.nlm.nih.gov/pubmed/25658708?dopt=Abstract	UHF (300 MHz-3 GHz) studies	Not Provided	1	0
147	Neural Cell Apoptosis Induced by Microwave Exposure Through Mitochondria-dependent Caspase-3 Pathway	Zuo H, Lin T, Wang D, Peng R, Wang S, Gao Y, Xu X, Li Y, Wang S, Zhao L, Wang L, Zhou H.	2014-03-09	Effect	Continuous			RF Signal Generator	http://www.ncbi.nlm.nih.gov/pubmed/24688304?dopt=Abstract	UHF (300 MHz-3 GHz) studies	National Natural Science Foundation	0	1
148	Impairment of long-term potentiation induction is essential for the disruption of spatial memory after microwave exposure	Wang H, Peng R, Zhou H, Wang S, Gao Y, Wang L, Yong Z, Zuo H, Zhao L, Dong J, Xu X, Su Z	2013-12-01	Effect	Pulsed			Microwave	http://www.ncbi.nlm.nih.gov/pubmed/23786183?dopt=Abstract	UHF (300 MHz-3 GHz) studies	No Conflict of Interest Stated	0	1
150	Reduction of Phosphorylated Synapsin I (Ser-553) Leads to Spatial Memory Impairment by Attenuating GABA Release after Microwave Exposure in Wistar Rats	Qiao S, Peng R, Yan H, Gao Y, Wang C, Wang S, Zou Y, Xu X, Zhao L, Dong J, Su Z, Feng X, Wang L, Hu X.	2014-04-01	Effect	Pulsed			Microwave	http://www.ncbi.nlm.nih.gov/pubmed/24743689?dopt=Abstract	UHF (300 MHz-3 GHz) studies	This work was supported by the National Basic Research Program of China (2011CB503706) and National Natural Science Foundation of China(30900382).	0	1
151	Microwave radiation induces injury to GC-2spd cells	Xue L, Wang SM, Chen HY, Peng RY, Zuo HY, Wang LF, Zhao L, Wang SX.	2014-03-01	Effect	Not Stated			Microwave	https://www.ncbi.nlm.nih.gov/pubmed/24738454	UHF (300 MHz-3 GHz) studies	Not Known	1	0
153	A new problem in inflammatory bladder diseases: Use of mobile phones	Koca O, Gokce AM, Akyuz M, Ercan F, Yurdakul N, Karaman MI.	2014-07-01	Effect	Pulsed	Real		Mobile Phone	http://www.ncbi.nlm.nih.gov/pubmed/25251956?dopt=Abstract	UHF (300 MHz-3 GHz) studies	No Conflict of Interest Stated	0	1
155	Alteration of glycine receptor immunoreactivity in the auditory brainstem of mice following three months of exposure to radiofrequency radiation at SAR 4.0 W/kg	Maskey D, Kim HG, Suh MW, Roh GS, Kim MJ.	2014-05-22	Effect	Not Stated			Simulated by a signal generator.	http://www.ncbi.nlm.nih.gov/pubmed/24866721	UHF (300 MHz-3 GHz) studies	Study was funded by the Institute of Medical Science Research of Dankook University Medical Center in 2011. Research was also supported by the Basic Science Research Program through the National Research Foundation of Korea (NRF) funded by the Ministry of Education, Science and Technology (2011-0011885).	0	1
160	Changes in mitochondrial functioning with electromagnetic radiation of ultra-high frequency as revealed by electron paramagnetic resonance methods	Burlaka A, Selyuk M, Gafurov M, Lukin S, Potaskalova V, Sidorik E.	2014-05-01	Effect	Pulsed		1	Simulated by a signal generator	http://www.ncbi.nlm.nih.gov/pubmed/24597749?dopt=Abstract	UHF (300 MHz-3 GHz) studies	No Conflict of Interest Stated	0	1
195	Effect of Base Transceiver Station waves on some immunological and hematological factors in exposed persons	Taheri M, Roshanaei G, Ghaffari J, Rahimnejad S, Khosroshahi BN, Aliabadi M, Eftekharian MM.	2017-01-01	Effect	Pulsed	Real		Mobile Phone Base Station	https://www.ncbi.nlm.nih.gov/pubmed/27911288	UHF (300 MHz-3 GHz) studies	Hamadan University of Medical Sciences	0	1
207	Effect of handheld mobile phone use on parotid gland salivary flow rate and volume	Bhargava S, Motwani MB, Patni VM.	2012-08-01	Effect	Pulsed	Real		Mobile Phone	http://www.ncbi.nlm.nih.gov/pubmed/22769405	UHF (300 MHz-3 GHz) studies	Not Stated	0	1
237	Radiofrequency radiations induced genotoxic and carcinogenic effects on chickpea (Cicer arietinum L.) root tip cells	Qureshi ST, Memon SA, Abassi AR, Sia MA, Bughio FA.	2016-02-11	Effect	Pulsed	Real	1	Mobile Phone GSM	http://www.sciencedirect.com/science/article/pii/S1319562X16000589	UHF (300 MHz-3 GHz) studies	King Saud University	1	0
258	GSM base station electromagnetic radiation and oxidative stress in rats	Yurekli AI, Ozkan M, Kalkan T, Saybasili H, Tuncel H, Atukeren P, Gumustas K, Seker S.	2009-07-07	Effect	Pulsed		1	Simulated by a signal generator	https://www.ncbi.nlm.nih.gov/pubmed/16954120	UHF (300 MHz-3 GHz) studies	Bogazici University Research Fund, Project, Research Fund of Istanbul University	0	1
260	How does long term exposure to base stations and mobile phones affect human hormone profiles?	Eskander EF, Estefan SF, Abd-Rabou AA.	2011-11-27	Effect	Pulsed	Real		Mobile Phone GSM	http://www.ncbi.nlm.nih.gov/pubmed/22138021	UHF (300 MHz-3 GHz) Ecological studies	Not Stated	0	1
266	A preliminary study to assess possible chromosomal damage among users of digital mobile phones	Gadhia PK, Shah T, Mistry A, Pithawala M, Tamakuvala D.	2003-01-01	Effect	Pulsed	Real		Mobile Phone	http://www.emf-portal.de/viewer.php?aid=10674&l=e	UHF (300 MHz-3 GHz) studies	Not Stated	1	0
273	The influence of handheld mobile phones on human parotid gland secretion	Goldwein O, Aframian DJ.	2010-03-01	Effect	Pulsed	Real		Mobile Phone	http://www.emf-portal.de/viewer.php?l=e&aid=17522	UHF (300 MHz-3 GHz) studies	Not Stated	0	1
393	Alterations in TSH and Thyroid Hormones following Mobile Phone Use	Mortavazi S, Habib A, Ganj-Karami A, Samimi-Doost R, Pour-Abedi A, Babaie A.	2009-10-01	Effect	Pulsed	Real		Mobile Phone	https://www.ncbi.nlm.nih.gov/pubmed/22216380	UHF (300 MHz-3 GHz) studies	University Grant	0	1
430	Asymmetries in hip mineralization in mobile cellular phone users	Saravi FD.	2011-03-01	Effect	Pulsed	Real		Mobile Phone	http://www.emf-portal.de/viewer.php?aid=19090&l=e	UHF (300 MHz-3 GHz) studies	Nuclear Medicine School, Mendoza, Argentina	0	1
490	Long-term, low-level microwave irradiation of rats	Chou CK, Guy AW, Kunz LL, Johnson RB, Crowley JJ, Krupp JH.	1992-01-01	Uncertain Effect	Pulsed			Microwave	https://www.ncbi.nlm.nih.gov/pubmed/1482413	UHF (300 MHz-3 GHz) studies	Dept of Defence	0	1
492	Effects of mobile phone radiation on serum testosterone in Wistar albino rats	Meo SA, Al-Drees AM, Husain S, Khan MM, Imran MB.	2010-08-01	Effect	Pulsed	Real		Mobile Phone	https://www.emf-portal.org/en/article/18557	UHF (300 MHz-3 GHz) studies	Deanship of Scienti c Research, King Saud University and Director of College of Medicine Research Centre, for providing funding	0	1
501	Exposure to 1800 MHz radiofrequency radiation induces oxidative damage to mitochondrial DNA in primary cultured neurons	Xu S, Zhou Z, Zhang L, Yu Z, Zhang W, Wang Y, Wang X, Li M, Chen Y, Chen C, He M, Zhang G, Zhong M	2009-10-30	Effect	Pulsed		1	Simulated by a signal generator	http://www.emf-portal.de/viewer.php?l=e&aid=17674	UHF (300 MHz-3 GHz) studies	National Natural Science Foundation of China	1	0
502	The influence of 1800 MHz GSM-like signals on hepatic oxidative DNA and lipid damage in nonpregnant, pregnant, and newly born rabbits	Tomruk A, Guler G, Dincel AS.	2009-10-23	Effect	Pulsed	Simulated	1	Mobile Phone GSM Simulated	http://www.emf-portal.de/viewer.php?l=e&aid=17640	UHF (300 MHz-3 GHz) studies	Gazi University Research Foundation	0	1
503	Effects of radiofrequency electromagnetic waves (RF- EMW) from cellular phones on human ejaculated semen: an in vitro pilot study	Agarwal A, Desai NR, Makker K, Varghese A, Mouradi R, Sabanegh E, Sharma R.	2008-09-22	Effect	Pulsed	Real	1	Mobile Phone	http://www.ncbi.nlm.nih.gov/pubmed/18804757	UHF (300 MHz-3 GHz) studies	Medical Centre	1	0
504	Effects of GSM 1800 MHz radiofrequency electromagnetic fields on protein expression profile of human breast cancer cell MCF-7	Zeng QL, Weng Y, Chen GD, Lu DQ, Chiang H, Xu ZP.	2006-05-01	Effect	Pulsed	Real		Mobile Phone GSM	http://www.ncbi.nlm.nih.gov/pubmed/16836875	UHF (300 MHz-3 GHz) studies	Not Known	1	0
505	Effects of GSM 1800 MHz radiofrequency electromagnetic fields on DNA damage in Chinese hamster lung cells	Zhang DY, Xu ZP, Chiang H, Lu DQ, Zeng QL.	2006-05-01	Effect	Pulsed	Real		Mobile Phone GSM	http://www.ncbi.nlm.nih.gov/pubmed/16836873	UHF (300 MHz-3 GHz) studies	Not Known	1	0
506	Non-thermal DNA breakage by mobile-phone radiation (1800 MHz) in human fibroblasts and in transformed GFSH-R17 rat granulosa cells in vitro	Diem E, Schwarz C, Adlkofer F, Jahn O, Rüdiger H.	2005-06-01	Effect	Continuous			RF Signal Generator	http://www.emf-portal.de/viewer.php?aid=11910&l=e	UHF (300 MHz-3 GHz) studies	European Union (EU)	1	0
507	Effects of mobile phone exposure (GSM 900 and WCDMA/UMTS) on polysomnography based sleep quality: An intra- and inter-individual perspective	Danker-Hopfe H, Dorn H, Bolz T, Peter A, Hansen ML, Eggert T, Sauter C.	2016-02-01	Effect	Pulsed			Microwave	http://www.emf-portal.de/viewer.php?l=e&aid=28363	UHF (300 MHz-3 GHz) studies	Deutsches Mobilfunk Forschungsprogramm (DMF; German Mobile Phone Research Programme) at Federal Office for Radiation Protection (BfS)	0	1
511	Association of Exposure to Radio-Frequency Electromagnetic Field Radiation (RF-EMFR) Generated by Mobile Phone Base Stations with Glycated Hemoglobin (HbA1c) and Risk of Type 2 Diabetes Mellitus.	Meo SA, Alsubaie Y, Almubarak Z, Almutawa H, AlQasem Y, Hasanato RM.	2015-11-01	Effect	Pulsed	Real		Mobile Phone Base Station	http://www.emf-portal.de/viewer.php?l=e&aid=28290	UHF (300 MHz-3 GHz) Ecological studies	No Conflict of Interest Stated	0	1
513	Long-term exposure to electromagnetic radiation from mobile phones and Wi-Fi devices decreases plasma prolactin, progesterone, and estrogen levels but increases uterine oxidative stress in pregnant rats and their offspring.	Yuksel M, Naziroglu M, Ozkaya MO.	2015-11-14	Effect	Pulsed	Simulated	1	Mobile Phone Simulated	http://www.ncbi.nlm.nih.gov/pubmed/26578367?dopt=Abstract	UHF (300 MHz-3 GHz) studies	The Scientific Research Unit (BAP) of the Suleyman Demirel University	0	1
514	Exposure to mobile phone electromagnetic field radiation, ringtone and vibration affects anxiety-like behaviour and oxidative stress biomarkers in albino wistar rats.	Shehu A, Mohammed A, Magaji RA, Muhammad MS.	2016-04-01	Effect	Pulsed	Real	1	Mobile Phone	http://www.ncbi.nlm.nih.gov/pubmed/26546224?dopt=Abstract	UHF (300 MHz-3 GHz) studies	Not Stated	0	1
559	The effect of melatonin on the liver of rats exposed to microwave radiation	Djordjevic B, Sokolovic D, Kocic G, Veljkovic A, Despotovic M, Basic J, Jevtovic-Stoimenov T, Sokolovic DM.	2015-06-01	Effect	Continuous		1	Microwave	https://www.emf-portal.org/en/article/26513	UHF (300 MHz-3 GHz) studies	Ministry of Education and Science, Serbia	0	1
565	Behavioural in-effectiveness of high frequency electromagnetic field in mice	Salunke BP, Umathe SN, Chavan JG.	2015-03-01	No Effect	Pulsed	Real		Mobile Phone	https://www.emf-portal.org/en/article/26263	UHF (300 MHz-3 GHz) studies	University Grants Commission (UGC), India	0	1
570	Effects of Prenatal and Postnatal Exposure of Wi-Fi on Development of Teeth and Changes in Teeth Element Concentration in Rats: Wi-Fi (2.45 GHz) and Teeth Element Concentrations	Ciftci ZZ, Kirzioglu Z, Naziroglu M, Ozmen O.	2015-02-01	Effect	Pulsed			RF Signal Generator	http://www.emf-portal.de/viewer.php?l=e&aid=26015	UHF (300 MHz-3 GHz) studies	S.D.U. (Suleyman Demirel University) Unit of Scientific Research Projects, Turkey	0	1
577	Effects of Early-Onset Radiofrequency Electromagnetic Field Exposure (GSM 900 MHz) on Behavior and Memory in Rats	Klose M, Grote K, Spathmann O, Streckert J, Clemens M, Hansen VW, Lerchl A.	2014-10-01	No Effect	Pulsed	Simulated		Mobile Phone GSM Simulated	http://www.emf-portal.de/viewer.php?l=e&aid=25786	UHF (300 MHz-3 GHz) studies	Bundesamt für Strahlenschutz (BfS; Federal Office for Radiation Protection), Salzgitter, Germany	0	1
583	Influence of Smartphone Wi-Fi Signals on Adipose-Derived Stem Cells	Lee SS, Kim HR, Kim MS, Park S, Yoon ES, Park SH, Kim DW.	2014-09-01	Uncertain Effect	Pulsed	Real		Mobile Phone & WiFi	http://www.emf-portal.de/viewer.php?l=e&aid=25602	UHF (300 MHz-3 GHz) studies	No Conflict of Interest Stated	1	0
585	Exposure time-dependent thermal effects of radiofrequency electromagnetic field exposure on the whole body of rats	Ohtani S, Ushiyama A, Maeda M, Hattori K, Kunugita N, Wang J, Ishii K.	2016-10-05	Effect	Pulsed	Real		WCDMA Wideband Code Division Multiple Access 3G	https://www.ncbi.nlm.nih.gov/pubmed/27665775	UHF (300 MHz-3 GHz) studies	Ministry of Internal Affairs and Communications, Japan.	0	1
597	Cell phone use and parotid salivary gland alterations: no molecular evidence	de Souza FT, Correia-Silva JF, Ferreira EF, Siqueira EC, Duarte AP, Gomez MV, Gomez RS, Gomes	2014-04-21	No Effect	Pulsed	Real		Mobile Phone	http://www.ncbi.nlm.nih.gov/pubmed/24753545?dopt=Abstract	UHF (300 MHz-3 GHz) studies	National Council for Scientific and Technological Development (CNPq)/Brazil, Fundação de Amparo à Pesquisa do Estado de Minas Gerais (FAPEMIG)/Brazil, and L'Oreal Brasil For Women in Science.	0	1
602	The Effects of Cell Phone Waves (900 MHz-GSM Band) on Sperm Parameters and Total Antioxidant Capacity in Rats	Ghanbari M, Mortazavi SB, Khavanin A, Khazaei M.	2013-04-01	Effect	Pulsed	Simulated	1	Mobile Phone Base Station Simulated	https://www.emf-portal.org/en/article/24276	UHF (300 MHz-3 GHz) studies	Tarbiat Modares University, Tehran, Iran	0	1
619	Impact of 900 MHz electromagnetic field exposure on main male reproductive hormone levels: a Rattus norvegicus model	Sepehrimanesh M, Saeb M, Nazifi S, Kazemipour N, Jelodar G, Saeb S.	2013-09-01	Effect	Continuous			RF Signal Generator	http://www.ncbi.nlm.nih.gov/pubmed/24357488?dopt=Abstract	UHF (300 MHz-3 GHz) studies	No Conflict of Interest Stated	0	1
621	The effect of electromagnetic radiation on the rat brain: an experimental study	Eser O, Songur A, Aktas C, Karavelioglu E, Caglar V, Aylak F, Ozguner F, Kanter M.	2012-10-30	Effect	Continuous		1	RF Signal Generator	http://www.ncbi.nlm.nih.gov/pubmed/24310452?dopt=Abstract	UHF (300 MHz-3 GHz) studies	Government Agencies	0	1
626	Effects of 900 MHz electromagnetic field emitted by cellular phones on electrocardiograms of guinea pigs	Meral I, Tekintangac Y, Demir H.	2014-02-01	No Effect	Pulsed	Simulated		Mobile Phone Simulated	https://www.ncbi.nlm.nih.gov/pubmed/24220873	UHF (300 MHz-3 GHz) studies	No specific grant from any funding agency in the public, commercial, or not-for-profit sectors	0	1
639	Maternal mobile phone exposure adversely affects the electrophysiological properties of Purkinje neurons in rat offspring	Haghani M, Shabani M, Moazzami K.	2013-10-10	Effect	Pulsed	Real		Mobile Phone	http://www.emf-portal.de/viewer.php?l=e&aid=23293	UHF (300 MHz-3 GHz) studies	No Conflict of Interest Stated	0	1
645	Genotoxic effects of exposure to radiofrequency electromagnetic fields (RF-EMF) in HL-60 cells are not reproducible	Speit G, Gminski R, Tauber R.	2013-08-15	No Effect	Continuous			RF Signal Generator	http://www.emf-portal.de/viewer.php?l=e&aid=22960	UHF (300 MHz-3 GHz) studies	Charité – Universitätsmedizin Berlin	1	0
650	Changes in numbers and size of synaptic vesicles of cortical neurons induced by exposure to 835 MHz radiofrequency-electromagnetic field	Kim JH, Kim HJ, Yu DH, Kweon HS, Huh YH, Kim HR.	2017-10-18	Effect	Continuous			Microwave	https://www.ncbi.nlm.nih.gov/pubmed/29045446	UHF (300 MHz-3 GHz) studies	National Research Foundation of Korea (NRF) funded by the Ministry of Science	0	1
651	Incidence of micronuclei in human peripheral blood lymphocytes exposed to modulated and unmodulated 2450 MHz radiofrequency fields	Vijayalaxmi V, Reddy AB, McKenzie RJ, McIntosh RL, Prihoda TJ, Wood AW.	2013-05-29	No Effect	Pulsed	Simulated		Mobile Phone W-CDMA Simulated	https://pubmed.ncbi.nlm.nih.gov/23720062/	UHF (300 MHz-3 GHz) studies	Swinburne University of Technology, Australia	1	0
663	Effects of prenatal and postnatal exposure to GSM-like radiofrequency on blood chemistry and oxidative stress in infant rabbits, an experimental study	Ozgur E, Kismali G, Guler G, Akcay A, Ozkurt G, Sel T, Seyhan N.	2013-03-01	Effect	Pulsed	Simulated	1	Mobile Phone GSM Simulated	http://www.emf-portal.de/viewer.php?aid=21970&l=e	UHF (300 MHz-3 GHz) studies	No Conflict of Interest Stated	0	1
674	Effects of simultaneous combined exposure to CDMA and WCDMA electromagnetic fields on serum hormone levels in rats	Jin YB, Choi HD, Kim BC, Pack JK, Kim N, Lee YS.	2012-12-01	No Effect	Pulsed	Simulated		Mobile Phone CDMA Simulated	http://www.ncbi.nlm.nih.gov/pubmed/23239176	UHF (300 MHz-3 GHz) studies	Grant from the Korea Communications Commission (2011) & Grant 2011 of Ewha Womans University. Korean Communications Commission makes income from spectrum licenses	0	1
678	Rat fertility and embryo fetal development: Influence of exposure to the Wi-Fi signal	de Gannes FP, Billaudel B, Haro E, Taxile M, Le Montagner L, Hurtier A, Ait Aissa S, Masuda H, Percherancier Y, Ruffie G, Dufour P, Veyret B, Lagroye I.	2012-11-23	No Effect	Pulsed	Simulated		WiFi Simulated and Amplifier	http://www.emf-portal.de/viewer.php?aid=21489&l=e	UHF (300 MHz-3 GHz) studies	National Research Agency (L'Agence nationale de la recherche, ANR), France	0	1
679	Effects of GSM-Frequency Electromagnetic Radiation on Some Physiological and Biochemical Parameters in Rats	Khirazova EE, Baizhumanov AA, Trofimova LK, Deev LI, Maslova MV, Sokolova NA, Kudryashova NY.	2012-06-01	Effect	Pulsed		1	Microwave	http://www.emf-portal.de/viewer.php?l=e&aid=21407	UHF (300 MHz-3 GHz) studies	Not Stated	0	1
683	Influence of Electromagnetic Radiation Produced by Mobile Phone on Some Biophysical Blood Properties in Rats	El-Bediwi AB, Saad M, El-Kott AF, Eid E.	2012-10-01	Effect	Pulsed	Real		Mobile Phone	https://www.ncbi.nlm.nih.gov/pubmed/23054912	UHF (300 MHz-3 GHz) studies	Not Stated	0	1
698	The effects of long-term exposure of magnetic field via 900-MHz GSM radiation on some biochemical parameters and brain histology in rats	Celikozlu SD, Ozyurt MS, Cimbiz A, Yardimoglu MY, Cayci MK, Ozay Y.	2012-06-07	Effect	Pulsed	Real		Mobile Phone GSM	http://www.ncbi.nlm.nih.gov/pubmed/22676902?dopt=Abstract	UHF (300 MHz-3 GHz) studies	No Conflict of Interest Stated	0	1
713	Radiofrequency radiation at 1950 MHz (UMTS) does not affect key cellular endpoints in neuron-like PC12 cells	Zeni O, Sannino A, Sarti M, Romeo S, Massa R, Scarfi MR.	2012-02-21	No Effect	Pulsed	Simulated		Mobile phone UMTS Simulated	https://www.emf-portal.org/en/article/20288	UHF (300 MHz-3 GHz) studies	Italian Ministry of University and Scientific Research; Grant number: PRIN 2007	1	0
729	1950 MHz Electromagnetic Fields Ameliorate Aβ Pathology in Alzheimer's Disease Mice	Jeong YJ, Kang GY, Kwon JH, Choi HD, Pack JK, Kim N, Lee YS, Lee HJ.	2015-03-21	Effect	Pulsed			Microwave	http://www.ncbi.nlm.nih.gov/pubmed/26017559	UHF (300 MHz-3 GHz) studies	Ministry of Food and Drug Safety	0	1
735	Increased blood-brain barrier permeability in mammalian brain 7 days after exposure to the radiation from a GSM-900 mobile phone	Nittby H, Brun A, Eberhardt J, Malmgren L, Persson BR, Salford LG.	2009-08-01	Effect	Pulsed	Real		Mobile Phone GSM	http://www.ncbi.nlm.nih.gov/pubmed/19345073	UHF (300 MHz-3 GHz) studies	Hans and Märit Rausing Charitable Foundation	0	1
736	Blood-brain barrier permeability and nerve cell damage in rat brain 14 and 28 days after exposure to microwaves from GSM mobile phones.	Eberhardt JL, Persson BR, Brun AE, Salford LG, Malmgren LO.	2008-01-01	Effect	Pulsed	Real		Mobile Phone GSM	http://www.emf-portal.de/viewer.php?aid=16425	UHF (300 MHz-3 GHz) studies	The Swedish Council for Work Life and Social Research and the Hans Rausing Charitable foundation (UK).	0	1
737	Nerve Cell Damage in Mammalian Brain after Exposure to Microwaves from GSM Mobile Phones	Salford LG, Brun AE, Eberhardt JL, Malmgren L, Persson BR.	2003-06-01	Effect	Pulsed	Real		Mobile Phone GSM	http://www.ncbi.nlm.nih.gov/pubmed/12782486	UHF (300 MHz-3 GHz) studies	Not Stated	0	1
739	Histopathological examinations of rat brains after long-term exposure to GSM-900 mobile phone radiation	Grafstrom G, Nittby H, Brun A, Malmgren L, Persson BR, Salford LG, Eberhardt J.	2008-07-07	No Effect	Pulsed	Simulated		Mobile Phone GSM Simulated	http://www.emf-portal.de/viewer.php?aid=16343&l=e	UHF (300 MHz-3 GHz) studies	Swedish Council for Working-life and Social Research, the Hans and Märit Rausing Charitable Trust and the Lund University Hospital Research Funds.	0	1
742	Cognitive impairment in rats after long-term exposure to GSM-900 mobile phone radiation	Nittby H, Grafström G, Tian DP, Malmgren L, Brun A, Persson BR, Salford LG, Eberhardt J.	2008-04-29	Effect	Pulsed	Real		Mobile Phone GSM	http://www.emf-portal.de/viewer.php?aid=15418	UHF (300 MHz-3 GHz) studies	Not Stated	0	1
743	Exposure of rat brain to 915 MHz GSM microwaves induces changes in gene expression but not double stranded DNA breaks or effects on chromatin conformation	Belyaev IY, Koch CB, Terenius O, Roxström-Lindquist K, Malmgren LO, H Sommer W, Salford LG, Persson BR.	2006-05-27	Effect	Pulsed			Transverse Electromagnetic (TEM) Cell	http://www.emf-portal.de/viewer.php?l=e&aid=13430	UHF (300 MHz-3 GHz) studies	Universities & Radiation Protection Bureau - Country	0	1
750	The effects of 2100-MHz radiofrequency radiation on nasal mucosa and mucociliary clearance in rats	Aydogan F, Aydin E, Koca G, Ozgur E, Atilla P, Tuzuner A, Demirci S, Tomruk A, Ozturk GG, Seyhan N, Korkmaz M, Muftuoglu S, Samim EE.	2015-04-16	Effect	Pulsed			Simulated by a signal generator	http://www.ncbi.nlm.nih.gov/pubmed/25885019	UHF (300 MHz-3 GHz) studies	Not Provided	0	1
752	The effect of 900 and 1800 MHz GSM-like radiofrequency irradiation and nicotine sulfate administration on the embryonic development of Xenopus laevis	Boga A, Emre M, Sertdemir Y, Akillioglu K, Binokay S, Demirhan O.	2014-12-20	Effect	Pulsed			Simulated by a signal generator	http://www.emf-portal.de/viewer.php?aid=26282&l=e	UHF (300 MHz-3 GHz) studies	Scientific Research Office of Çukurova Üniversitesi	0	1
756	Effects of 915 MHz electromagnetic-field radiation in TEM cell on the blood-brain barrier and neurons in the rat brain	Masuda H, Ushiyama A, Takahashi M, Wang J, Fujiwara O, Hikage T, Nojima T, Fujita K, Kudo M, Ohkubo C.	2009-07-01	No Effect	Pulsed			Simulated by a signal generator	http://www.emf-portal.de/viewer.php?aid=17236&l=e	UHF (300 MHz-3 GHz) studies	Association of Radio Industries and Businesses (ARIB), Japan	0	1
757	Does prolonged radiofrequency radiation emitted from Wi-Fi devices induce DNA damage in various tissues of rats?	Akdag MZ, Dasdag S, Canturk F, Karabulut D, Caner Y, Adalier N.	2016-01-08	Effect	Continuous	Simulated		WiFi simulated	http://www.ncbi.nlm.nih.gov/pubmed/26775760?dopt=Abstract	UHF (300 MHz-3 GHz) studies	University funded	0	1
760	Adaptive response in mice exposed to 900 MHZ radiofrequency fields: bleomycin-induced DNA and oxidative damage/repair	Zong C, Ji Y, He Q, Zhu S, Qin F, Tong J, Cao Y.	2015-03-01	Effect	Continuous			Gigahertz Transverse Electromagnetic (GTEM) Cell	http://www.emf-portal.de/viewer.php?aid=25895&l=e	UHF (300 MHz-3 GHz) studies	National Natural Science Foundation of China, China Ministry of Science and Technology	0	1
769	Effects of long-term pre- and post-natal exposure to 2.45 GHz wireless devices on developing male rat kidney	Kuybulu AE, Öktem F, Çiriş İM, Sutcu R, Örmeci AR, Çömlekçi S, Uz E.	2016-02-24	Effect	Pulsed	Simulated	1	Mobile Phone GSM Simulated	https://www.ncbi.nlm.nih.gov/pubmed/26905323	UHF (300 MHz-3 GHz) studies	Not stated. No conflict of interest	0	1
778	RF EMR from cell phone causes defective testicular function in male Wistar rats	Oyewopo AO, Olaniyi SK, Oyewopo CI, Jimoh AT.	2017-03-01	Effect	Pulsed	Real	1	Mobile Phone 2G GSM	https://www.ncbi.nlm.nih.gov/pubmed/28261838	UHF (300 MHz-3 GHz) studies	No Conflict of Interest Stated	0	1
781	Ultra high frequency-electromagnetic field irradiation during pregnancy leads to an increase in erythrocytes micronuclei incidence in rat offspring	Ferreira AR, Knakievicz T, Pasquali MA, Gelain DP, Dal-Pizzol F, Fernandez CE, de Salles AA, Ferreira HB, Moreira JC.	2006-08-23	Effect	Continuous	Real		Analogue Mobile Phone	http://www.emf-portal.de/viewer.php?l=e&aid=14184	UHF (300 MHz-3 GHz) studies	Ministry of Science, Technology, Innovation and Communications	0	1
788	Effect of radio-frequency electromagnetic radiations (RF-EMR) on passive avoidance behaviour and hippocampal morphology in Wistar rats	Narayanan SN, Kumar RS, Potu BK, Nayak S, Bhat PG, Mailankot M.	2010-05-01	Effect	Pulsed	Real		Mobile Phone 2G GSM	http://www.emf-portal.de/viewer.php?aid=17896&l=e	UHF (300 MHz-3 GHz) studies	Not Stated	0	1
804	Mutagenic response of 2.45 GHz radiation exposure on rat brain	Kesari KK, Behari J, Kumar S.	2010-04-01	Effect	Continuous		1	Microwave Oven	http://www.emf-portal.de/viewer.php?aid=18089&l=e	UHF (300 MHz-3 GHz) studies	Medical Research Council - Country	0	1
810	The effect of radiofrequency radiation on DNA and lipid damage in non-pregnant and pregnant rabbits and their newborns	Guler G, Tomruk A, Ozgur E, Seyhan N.	2010-03-01	Effect	Pulsed	Simulated	1	Mobile Phone GSM Simulated	http://www.emf-portal.de/viewer.php?aid=18104&l=e	UHF (300 MHz-3 GHz) studies	University funded	0	1
812	Repeated exposure to low-level extremely low frequency-modulated microwaves affects cortex-hypothalamus interplay in freely moving rats: EEG study	Vorobyov V, Janac B, Pesic V, Prolic Z.	2010-05-01	Effect	Pulsed			TDMA low level microwave	http://www.emf-portal.de/viewer.php?l=e&aid=18123	UHF (300 MHz-3 GHz) studies	Ministry for Science and Technology Development, Serbia	0	1
817	Exposure to cell phone radiation up-regulates apoptosis genes in primary cultures of neurons and astrocytes	Zhao TY, Zou SP, Knapp PE.	2007-01-22	Effect	Pulsed	Real		Mobile Phone	https://www.ncbi.nlm.nih.gov/pubmed/17187929	UHF (300 MHz-3 GHz) studies	Not Stated	1	0
835	Evaluation of hematopoietic system effects after in vitro radiofrequency radiation exposure in rats	Kumar G, Wood AW, Anderson V, McIntosh RL, Chen YY, McKenzie RJ.	2010-11-04	No Effect	Continuous			Transverse Electromagnetic (TEM) Cell	http://www.emf-portal.de/viewer.php?l=e&aid=18740	UHF (300 MHz-3 GHz) studies	No Conflict of Interest Stated	1	0
839	Mobile phone usage and male infertility in Wistar rats	Kesari KK, Kumar S, Behari J.	2010-10-01	Effect	Pulsed	Real		Mobile Phone	http://www.emf-portal.de/viewer.php?aid=19004&l=e	UHF (300 MHz-3 GHz) studies	Indian Council of Medical Research, New Delhi	0	1
844	The effect of prenatal exposure to 1800 MHz electromagnetic field on calcineurin and bone development in rats	Erkut A, Tumkaya L, Balik MS, Kalkan Y, Guvercin Y, Yilmaz A, Yuce S, Cure E, Sehitoglu I.	2016-02-01	Effect	Pulsed		1	Microwave	http://www.ncbi.nlm.nih.gov/pubmed/26959616?dopt=Abstract	UHF (300 MHz-3 GHz) studies	University funded	0	1
863	Induction of adaptive response in mice exposed to 900MHz radiofrequency fields: application of micronucleus assay	Jiang B, Zong C, Zhao H, Ji Y, Tong J, Cao Y.	2013-01-04	Effect	Continuous			Giga Transverse Electromagnetic (GTEM) Cell	http://www.emf-portal.de/viewer.php?aid=21616&l=e	UHF (300 MHz-3 GHz) studies	Scientific Grants Agency - Country funding from the National Natural Science Foundation of China (Nos. 81020108028), 973 project grant from China Ministry of Science and Technology (2011CB503705) and The Priority Academic Program Development of Jiangsu Higher Education Institutions.	0	1
868	Adaptive response in human blood lymphocytes exposed to non-ionizing radiofrequency fields: resistance to ionizing radiation-induced damage	Sannino A, Zeni O, Romeo S, Massa R, Gialanella G, Grossi G, Manti L, Vijayalaxmi, Scarfì MR.	2013-08-26	Effect	Pulsed	Simulated		Mobile phone UMTS Simulated	http://www.emf-portal.de/viewer.php?aid=23403&l=e	UHF (300 MHz-3 GHz) studies	National Institute of Nuclear Physics (INFN), section of Naples, Project ARCAICA.	1	0
885	Effects of radiofrequency radiation exposure on blood-brain barrier permeability in male and female rats	Sirav B, Seyhan N.	2011-11-01	Effect	Pulsed			Microwave	http://www.ncbi.nlm.nih.gov/pubmed/22047463	UHF (300 MHz-3 GHz) studies	Research Fund of Gazi University	0	1
888	Effects of Radiofrequency Electromagnetic Fields (UMTS) on Reproduction and Development of Mice: A Multi-generation Study	Sommer AM, Grote K, Reinhardt T, Streckert J, Hansen V, Lerchl A.	2009-01-01	Uncertain Effect	Pulsed	Simulated		RF Signal Mobile phone UMTS Simulated	http://www.emf-portal.de/viewer.php?aid=16687&l=e	UHF (300 MHz-3 GHz) studies	Radiation Protection Bureau - Country	0	1
902	Spatial memory performance of Wistar rats exposed to mobile phone	Narayanan SN, Kumar RS, Potu BK, Nayak S, Mailankot M.	2009-04-01	Effect	Pulsed	Real		Mobile Phone 2G GSM	http://www.ncbi.nlm.nih.gov/pubmed/19330250	UHF (300 MHz-3 GHz) studies	Not Stated	0	1
917	Mobile Phone Radiation Induces Reactive Oxygen Species Production and DNA Damage in Human Spermatozoa In Vitro	De Iuliis GN, Newey RJ, King BV, Aitken RJ	2009-07-01	Effect	Not Stated		1	RF Signal Generator	http://www.emf-portal.de/viewer.php?aid=17394&l=e	UHF (300 MHz-3 GHz) studies	ARC Centre of Excellence in Biotechnology and Development (CE 0348239) and NHMRC (Program Grant 494802) for financial support	1	0
921	Effect of electromagnetic waves from mobile phone on immune status of male rats: possible protective role of vitamin D	El-Gohary OA, Said MA.	2017-02-01	Effect	Pulsed	Real		Mobile Phone	https://www.ncbi.nlm.nih.gov/pubmed/27901344	UHF (300 MHz-3 GHz) studies	No Conflict of Interest Stated	0	1
933	No effect of mobile phone-like RF exposure on patients with atopic dermatitis	Johansson A, Forsgren S, Stenberg B, Wilén J, Kalezic N, Sandström M.	2008-01-01	No Effect	Pulsed	Real		Mobile Phone Base Station	http://www.ncbi.nlm.nih.gov/pubmed/18240288	UHF (300 MHz-3 GHz) studies	Scientific Society - Country	0	1
936	Influence of Electromagnetic Fields Emitted by GSM-900 Cellular Telephones on the Circadian Patterns of Gonadal, Adrenal and Pituitary Hormones in Men	Djeridane Y, Touitou Y, de Seze R.	2008-02-01	Effect	Pulsed	Real		Mobile Phone GSM	http://www.ncbi.nlm.nih.gov/pubmed/18302481	UHF (300 MHz-3 GHz) studies	Motorola, Inc.	0	1
983	The relationship between NMDA receptors and microwave-induced learning and memory impairment: a long-term observation on Wistar rats	Wang H, Peng R, Zhao L, Wang S, Gao Y, Wang L, Zuo H, Dong J, Xu X, Zhou H, Su Z.	2015-01-24	Effect	Pulsed			Simulated by a signal generator	http://www.ncbi.nlm.nih.gov/pubmed/25426698	UHF (300 MHz-3 GHz) studies	National Natural Science Foundation of China	0	1
990	Histological and histochemical study of the protective role of rosemary extract against harmful effect of cell phone electromagnetic radiation on the parotid glands	Ghoneim FM, Arafat EA.	2016-05-04	Effect	Pulsed	Real	1	Mobile Phone GSM	http://www.ncbi.nlm.nih.gov/pubmed/27155802?dopt=Abstract	UHF (300 MHz-3 GHz) studies	No Conflict of Interest Stated	0	1
1010	Neurological changes induced by a mobile phone	Hocking B, Westerman R.	2002-10-01	Effect	Pulsed	Real		Mobile Phone	http://www.ncbi.nlm.nih.gov/pubmed/12422029	UHF (300 MHz-3 GHz) studies	Not Stated	0	1
1016	Neurological abnormalities associated with CDMA exposure	Hocking B, Westerman R.	2001-09-01	Effect	Pulsed	Real		Mobile Phone Base Station	http://www.ncbi.nlm.nih.gov/pubmed/11584121	UHF (300 MHz-3 GHz) studies	No Specific Funding Received	0	1
1044	Enhancement of Allergic Skin Wheal Responses by Microwave Radiation from Mobile Phones in Patients with Atopic Eczema/Dermatitis Syndrome	Kimata H.	2002-12-01	Effect	Pulsed	Real		Mobile Phone	https://www.ncbi.nlm.nih.gov/pubmed/12483040	UHF (300 MHz-3 GHz) studies		0	1
1080	RF-EMF exposure at 1800 MHz did not elicit DNA damage or abnormal cellular behaviors in different neurogenic cells	Su L, Wei X, Xu Z, Chen G.	2017-04-01	No Effect	Pulsed	Simulated		Mobile Phone GSM Simulated	https://www.ncbi.nlm.nih.gov/pubmed/28026047	UHF (300 MHz-3 GHz) studies	Ministry of Science and Technology; National Natural Science Foundation of China	1	0
1088	Effect of Low Level Subchronic Microwave Radiation on Rat Brain	Deshmukh PS, Megha K, Nasare N, Banerjee BD, Ahmed RS, Abegaonkar MP, Tripathi AK, Mediratta PK.	2016-12-01	Effect	Continuous			RF Signal Generator and Gigahertz Transverse Electromagnetic (GTEM) cell	https://www.ncbi.nlm.nih.gov/pubmed/28081746	UHF (300 MHz-3 GHz) studies	Indian Council of Medical Research (ICMR), New Delhi	0	1
1100	Microwaves from UMTS/GSM mobile phones induce long-lasting inhibition of 53BP1/gamma-H2AX DNA repair foci in human lymphocytes	Belyaev IY, Markovà E, Hillert L, Malmgren LO, Persson BR.	2008-10-06	Effect	Pulsed	Simulated		Mobile Phone GSM Simulated	https://www.emf-portal.org/en/article/16451	UHF (300 MHz-3 GHz) studies	Swedish Council for Working Life and Social Research (FAS) &Animal Welfare Agency & Radiation Protection Authority (SSI) National Scholarship Program, Slovak Republic	1	0
1101	Microwaves from GSM mobile telephones affect 53BP1 and gamma-H2AX foci in human lymphocytes from hypersensitive and healthy persons	Markova E, Hillert L, Malmgren L, Persson BR, Belyaev IY.	2005-09-01	Effect	Pulsed	Real		Mobile Phone 2G GSM	http://www.ncbi.nlm.nih.gov/pubmed/16140623	UHF (300 MHz-3 GHz) studies	Swedish Work Environment Fund	0	1
1112	Microwave radiation (2.45 GHz)-induced oxidative stress: Whole-body exposure effect on histopathology of Wistar rats	Chauhan P, Verma HN, Sisodia R, Kesari KK.	2016-06-30	Effect	Not Stated		1	Microwave Oven	http://www.ncbi.nlm.nih.gov/pubmed/27362544	UHF (300 MHz-3 GHz) studies	Council for Scientific and Industrial Research New Delhi	0	1
1126	Effects of 1950 MHz W-CDMA-like signal on human spermatozoa	Nakatani-Enomoto S, Okutsu M, Suzuki S, Suganuma R, Groiss SJ, Kadowaki S, Enomoto H, Fujimori K, Ugawa Y.	2016-06-11	No Effect	Pulsed	Simulated		Mobile Phone W-CDMA Simulated	https://www.emf-portal.org/en/article/29652	UHF (300 MHz-3 GHz) studies	Association of Radio Industries and Businesses (ARIB), Japan	1	0
1129	Social behavioral testing and brain magnetic resonance imaging in chicks exposed to mobile phone radiation during development	Zhou Z, Shan J, Zu J, Chen Z, Ma W, Li L, Xu J.	2016-06-10	Effect	Pulsed	Real		Mobile Phone GSM	http://www.ncbi.nlm.nih.gov/pubmed/27287450?dopt=Abstract	UHF (300 MHz-3 GHz) studies	Shanghai Health and Family Planning Commission and a research grant from Shanghai Ren Ji Hospital	0	1
1139	Radiofrequency radiation injures trees around mobile phone base stations	Waldmann-Selsam C, Balmori-de la Puente A, Breunig H, Balmori A.	2016-12-01	Effect	Pulsed	Real		Mobile Phone Base Station	http://www.ncbi.nlm.nih.gov/pubmed/27552133	UHF (300 MHz-3 GHz) studies	Department of Zoology, University Complutense of Madrid	0	1
1156	Effects of Long Term Exposure of 900-1800 MHz Radiation Emitted from 2G Mobile Phone on Mice Hippocampus- A Histomorphometric Study	Mugunthan N, Shanmugasamy K, Anbalagan J, Rajanarayanan S, Meenachi S.	2016-08-01	Effect	Pulsed	Real		Mobile Phone 2G GSM	https://www.ncbi.nlm.nih.gov/pubmed/27656427?dopt=Abstract	UHF (300 MHz-3 GHz) studies	Not Stated	0	1
1157	Effects of radiofrequency field exposure on glutamate-induced oxidative stress in mouse hippocampal HT22 cells	Kim JY, Kim HJ, Kim N, Kwon JH, Park MJ.	2016-09-20	Effect	Pulsed	Simulated	1	Mobile Phone W-CDMA Simulated	https://www.ncbi.nlm.nih.gov/pubmed/27648632?dopt=Abstract	UHF (300 MHz-3 GHz) studies	IT R&D program of MSIP/IITP, National R&D Program through the Korea Institute of Radiological and Medical Sciences funded by the Ministry of Science	1	0
1158	Adverse effects in lumbar spinal cord morphology and tissue biochemistry in Sprague Dawley male rats following exposure to a continuous 1-h a day 900-MHz electromagnetic field throughout adolescence	Kerimoglu G, Aslan A, Baş O, Çolakoğlu S, Odacı E.	2016-12-01	Effect	Continuous		1	Microwave	https://www.ncbi.nlm.nih.gov/pubmed/27650207?dopt=Abstract	UHF (300 MHz-3 GHz) studies	Not Stated	0	1
1160	Effect of mobile phone radiation on pentylenetetrazole-induced seizure threshold in mice	Kouchaki E, Motaghedifard M, Banafshe HR.	2016-07-01	Effect	Pulsed	Simulated		Mobile Phone GSM Simulated	https://www.ncbi.nlm.nih.gov/pubmed/27635206?dopt=Abstract	UHF (300 MHz-3 GHz) studies	University funded	0	1
1167	The safety of digital mobile cellular telephones with minute ventilation rate adaptive pacemakers	Sparks PB, Mond HG, Joyner KH, Wood MP.	1996-10-01	Uncertain Effect	Pulsed	Simulated		Mobile Phone GSM Simulated	https://www.ncbi.nlm.nih.gov/pubmed/8904535	UHF (300 MHz-3 GHz) studies	Not Stated	0	1
1172	Evaluation of selected biochemical parameters in the saliva of young males using mobile phones	Abu Khadra KM, Khalil AM, Abu Samak M, Aljaberi A.	2014-02-05	Effect	Pulsed	Real	1	Mobile Phone	https://www.ncbi.nlm.nih.gov/pubmed/24499288	UHF (300 MHz-3 GHz) studies	Deanship of Research and Graduate Studies at Yarmouk Unversity/Irbid-JORDAN;	0	1
1173	Rat testicular impairment induced by electromagnetic radiation from a conventional cellular telephone and the protective effects of the antioxidants vitamins C and E	Al-Damegh MA.	2012-03-07	Effect	Pulsed	Real	1	Mobile Phone GSM	https://www.ncbi.nlm.nih.gov/pubmed/22892924?dopt=Abstract	UHF (300 MHz-3 GHz) studies	Not Stated	0	1
1178	Modulation of wireless (2.45 GHz)-induced oxidative toxicity in laryngotracheal mucosa of rat by melatonin	Aynali G, Nazıroğlu M, Çelik Ö, Doğan M, Yarıktaş M, Yasan H.	2013-05-01	Effect	Pulsed		1	RF Signal Generator	https://www.ncbi.nlm.nih.gov/pubmed/23479077	UHF (300 MHz-3 GHz) studies	No Conflict of Interest Stated	0	1
1179	Effects of mobile phones on oxidant/antioxidant balance in cornea and lens of rats	Balci M, Devrim E, Durak I.	2009-07-02	Effect	Pulsed	Real	1	Mobile Phone	https://www.ncbi.nlm.nih.gov/pubmed/17364731	UHF (300 MHz-3 GHz) studies	Not Stated	0	1
1182	Evaluation of the Effect of Radiofrequency Radiation Emitted From Wi-Fi Router and Mobile Phone Simulator on the Antibacterial Susceptibility of Pathogenic Bacteria Listeria monocytogenes and Escherichia coli	Taheri M, Mortazavi SM, Moradi M, Mansouri S, Hatam GR, Nouri F.	2017-01-23	Effect	Pulsed	Real		WiFi	https://www.ncbi.nlm.nih.gov/pubmed/28203122	UHF (300 MHz-3 GHz) studies	Research Deputy of Kerman University of Medical Sciences, Kerman, Iran.	1	0
1188	Study of low-intensity 2450-MHz microwave exposure enhancing the genotoxic effects of mitomycin C using micronucleus test and comet assay in vitro	Zhang MB, He JL, Jin LF, Lu DQ.	2002-12-01	Effect	Not Stated			Magnetron	https://www.emf-portal.org/en/article/9988	UHF (300 MHz-3 GHz) studies	National Natural Science Foundation (NSFC), China & International Cooperative Foundation of Science-Technique Bureau of Zhejiang Province, China	1	0
1189	Influence of 1.8 GHz microwave on DNA damage induced by 4 chemical mutagens	Wang BH, Lu DQ, Jin LF, Zheng W, Lou JL, Deng HP, Li QY, He JL.	2005-06-01	Effect	Not Stated			Microwave	https://www.ncbi.nlm.nih.gov/pubmed/16124885	UHF (300 MHz-3 GHz) studies	Not Known	1	0
1190	Influence of 1.8 GHz microwave on DNA damage induced by ultraviolet C ray	Wang BH, Lu DQ, Jin LF, Chen SJ, Lou JL, Zheng W, He JL.	2007-08-01	Effect	Not Stated			Microwave	https://www.ncbi.nlm.nih.gov/pubmed/17945103	UHF (300 MHz-3 GHz) studies	Not Known	1	0
1191	Studying the synergistic damage effects induced by 1.8 GHz radiofrequency field radiation (RFR) with four chemical mutagens on human lymphocyte DNA using comet assay in vitro	Baohong W, Jiliang H, Lifen J, Deqiang L, Wei Z, Jianlin L, Hongping D.	2005-06-02	Effect	Not Stated			RF Signal Generator and Transverse Electromagnetic (TEM) cell	https://www.ncbi.nlm.nih.gov/pubmed/15935405	UHF (300 MHz-3 GHz) studies	This research work was supported by the Natural Science Foundation of Zhejiang Province and International Cooperative Foundation of Science-Technique Bureau of Zhejiang Province (No. 012104) 2001–2002	1	0
1193	Cytogenetic effects of 935.2-MHz (GSM) microwaves alone and in combination with mitomycin C	Maes A, Collier M, Van Gorp U, Vandoninck S, Verschaeve L.	1997-09-18	Effect	Not Stated			Signal Generator and a Transverse Electromagnetic (TEM) Cell	https://www.emf-portal.org/en/article/948	UHF (300 MHz-3 GHz) studies	BELGACOM (Proximus Group is the largest telecommunications company in Belgium)	1	0
1194	954 MHz microwaves enhance the mutagenic properties of mitomycin C	Maes A, Collier M, Slaets D, Verschaeve L.	1996-03-31	Effect	Pulsed	Real		Mobile Phone Base Station (GSM)	https://www.ncbi.nlm.nih.gov/pubmed/8698043	UHF (300 MHz-3 GHz) studies	Not Stated	1	0
1198	Changes in antioxidant capacity of blood due to mutual action of electromagnetic field (1800 MHz) and opioid drug (tramadol) in animal model of persistent inflammatory state.	Bodera P, Stankiewicz W, Zawada K, Antkowiak B, Paluch M, Kieliszek J, Kalicki B, Bartosiński A, Wawer I.	2012-11-02	Effect	Pulsed		1	Simulated by a signal generator	https://www.ncbi.nlm.nih.gov/pubmed/23744426	UHF (300 MHz-3 GHz) studies	Not Stated	0	1
1199	Microwave-enhanced folding and denaturation of globular proteins	Bohr H, Bohr J.	2000-04-01	Effect	Not Stated			Microwave Oven	https://www.ncbi.nlm.nih.gov/pubmed/11088227	UHF (300 MHz-3 GHz) studies	University funded	1	0
1202	Spontaneous and nitrosourea-induced primary tumors of the central nervous system in Fischer 344 rats exposed to frequency-modulated microwave fields	Adey WR, Byus CV, Cain CD, Higgins RJ, Jones RA, Kean CJ, Kuster N, MacMurray A, Stagg RB, Zimmerman G.	2000-04-01	No Effect	Pulsed	Real		Mobile Phone	https://www.ncbi.nlm.nih.gov/pubmed/10766172	UHF (300 MHz-3 GHz) studies	Motorola Corporation	0	1
1203	Effects of Electromagnetic Fields of Cellular Phone on Cortisol and Testosterone	Aghdam Shahryar H, Lotfi AR, Bahojb M, Karami AR.	2008-01-01	Effect	Pulsed	Real		Mobile Phone	https://www.emf-portal.org/en/article/20315	UHF (300 MHz-3 GHz) studies	Islamic Azad University, Iran	0	1
1205	In situ detection of gliosis and apoptosis in the brains of young rats exposed in utero to a Wi-Fi signal	Ait-Aissa S, Billaudel B, de Gannes FP, Hurtier A, Haro E, Taxile M, Ruffie G, Athane A, Veyret B, Lagroye I.	2011-01-03	No Effect	Continuous	Simulated		WiFi Simulated	https://www.emf-portal.org/en/article/19403	UHF (300 MHz-3 GHz) studies	Fondation Santé et Radiofréquences and France Telecom	0	1
1206	In utero and early-life exposure of rats to a Wi-Fi signal: Screening of immune markers in sera and gestational outcome	Aït-Aïssa S, Billaudel B, de Gannes FP, Ruffié G, Duleu S, Hurtier A, Haro E, Taxile M, Athané A, Geffard M, Wu T, Wiart J, Bodet D, Veyret B, Lagroye I.	2011-10-13	No Effect	Pulsed	Simulated		WiFi simulated	https://www.emf-portal.org/en/article/20086	UHF (300 MHz-3 GHz) studies	Fondation Santé et Radiofréquences, France	0	1
1207	Impact of radio frequency electromagnetic radiation on DNA integrity in the male germline	Aitken RJ, Bennetts LE, Sawyer D, Wiklendt AM, King BV.	2005-06-01	Effect	Continuous			RF Signal Generator	https://www.emf-portal.org/en/article/11992	UHF (300 MHz-3 GHz) studies	Funded by a collaboration of international and local agencies: RMC small grant no. 2521229, NIEHS Grant (NRSA, USA) no. F32HM 08557-01, ARC large grant no. AO9918038 and the ARC Centre of Excellence in Biotechnology and Development.	0	1
1208	Increased ornithine decarboxylase activity in cultured cells exposed to low energy modulated microwave fields and phorbol ester tumor promoters	Byus CV, Kartun K, Pieper S, Adey WR.	1988-08-01	Effect	Amplitude Modulation			Simulated by a signal generator	https://www.ncbi.nlm.nih.gov/pubmed/3390816	UHF (300 MHz-3 GHz) studies	Government Agencies	1	0
1209	Effects of low level electromagnetic field exposure at 2.45 GHz on rat cornea	Akar A, Karayiğit MÖ, Bolat D, Gültiken ME, Yarim M, Castellani G.	2013-04-01	Uncertain Effect	Pulsed			RF Signal Generator	https://www.ncbi.nlm.nih.gov/pubmed/23206266	UHF (300 MHz-3 GHz) studies	No Conflict of Interest Stated	0	1
1211	Reactive oxygen species levels and DNA fragmentation on astrocytes in primary culture after acute exposure to low intensity microwave electromagnetic field	Campisi A, Gulino M, Acquaviva R, Bellia P, Raciti G, Grasso R, Musumeci F, Vanella A, Triglia A.	2010-03-31	Effect	Continuous		1	Simulated by a signal generator	https://www.ncbi.nlm.nih.gov/pubmed/20156525	UHF (300 MHz-3 GHz) studies	Not Stated	1	0
1212	The Effects of Whole Body Cell Phone Exposure on the T1 Relaxation Times and Trace Elements in the Serum of Rats	Aksen, F, Dasdag S, Akdag MZ, Askin M, Dasdag MM.	2004-07-07	Effect	Pulsed	Real		Mobile Phone GSM	http://www.tandfonline.com/doi/abs/10.1081/JBC-120037862	UHF (300 MHz-3 GHz) studies	Motorola Florida Research Laboratories, Georgia, and Dicle University	0	1
1213	Fetal radiofrequency radiation exposure from 800-1900 mhz-rated cellular telephones affects neurodevelopment and behavior in mice	Aldad TS, Gan G., Gao XB, Taylor HS.	2012-03-15	Effect	Pulsed	Real		Mobile Phone 2G GSM	http://www.nature.com/articles/srep00312	UHF (300 MHz-3 GHz) studies	Supported by grants from EHHI and NICHD (HD052668).	0	1
1215	The effects of radiofrequency on skin: experimental study	Alvarez N, Ortiz L, Vicente V, Alcaraz M, Sánchez-Pedreño P.	2008-02-01	Effect	Pulsed			Radio Frequency	https://www.emf-portal.org/en/article/15701	UHF (300 MHz-3 GHz) studies	Grupo Solilaser, Spain	0	1
1216	Effect of a chronic GSM 900 MHz exposure on glia in the rat brain	Ammari M, Brillaud E, Gamez C, Lecomte A, Sakly M, Abdelmelek H, de Seze R.	2008-04-01	Effect	Pulsed	Simulated		Mobile Phone GSM Simulated	https://www.emf-portal.org/en/article/15902	UHF (300 MHz-3 GHz) studies		0	1
1217	GFAP expression in the rat brain following sub-chronic exposure to a 900 MHz electromagnetic field signal	Ammari M, Gamez C, Lecomte A, Sakly M, Abdelmelek H, De Seze R.	2010-05-01	Effect	Pulsed	Simulated		Mobile Phone GSM Simulated	https://www.emf-portal.org/en/article/18119	UHF (300 MHz-3 GHz) studies	unded by Project RFMemat, The Health and Radiofre- quencies Foundation	0	1
1219	Effect of head-only sub-chronic and chronic exposure to 900-MHz GSM electromagnetic fields on spatial memory in rats	Ammari M, Jacquet, A, Lecomte, A, Abdelmelek, H, de Seze, R.	2009-07-03	No Effect	Pulsed	Real		Mobile Phone 2G GSM	https://www.ncbi.nlm.nih.gov/pubmed/19117181	UHF (300 MHz-3 GHz) studies	Project RFMemat, The Health and Radiofrequencies Foundation.	0	1
1220	Exposure to GSM 900 MHz electromagnetic fields affects cerebral cytochrome c oxidase activity	Ammari M, Lecomte A, Sakly M, Abdelmelek H, de-Seze R.	2008-08-19	Effect	Pulsed			Microwave	https://www.emf-portal.org/en/article/16106	UHF (300 MHz-3 GHz) studies	(Ministry of Ecology, Energy, Sustainable Development, and Regional Planning), France	0	1
1225	Effects of GSM-900 microwaves on DMBA-induced mammary gland tumors in female Sprague-Dawley rats	Anane R, Dulou PE, Taxile M, Geffard M, Crespeau FL, Veyret B.	2003-10-01	Uncertain Effect	Pulsed	Real		Mobile Phone Base Station	https://www.emf-portal.org/en/article/11209	UHF (300 MHz-3 GHz) studies	France Telecom, Aquitaine Research Council France, CNRS; French National Center for Scientific Research)	0	1
1226	Effects of GSM-900 microwaves on the experimental allergic encephalomyelitis (EAE) rat model of multiple sclerosis	Anane R, Geffard M, Taxile M, Bodet D, Billaudel B, Dulou PE, Veyret B.	2003-04-01	No Effect	Pulsed			Microwave	https://www.emf-portal.org/en/article/9788	UHF (300 MHz-3 GHz) studies	France Telecom and Aquitaine Research Council, France	0	1
1229	Whole body exposure of rats to microwaves emitted from a cell phone does not affect the testes	Dasdag S, Zulkuf Akdag M, Aksen F, Yilmaz F, Bashan M, Mutlu Dasdag M, Salih Celik M.	2003-03-12	No Effect	Pulsed	Real		Mobile Phone 2G GSM	https://www.ncbi.nlm.nih.gov/pubmed/12669301	UHF (300 MHz-3 GHz) studies	No Conflict of Interest Stated	0	1
1231	Effects of exposure of the ear to GSM microwaves: in vivo and in vitro experimental studies	Aran JM, Carrere N, Chalan Y, Dulou PE, Larrieu S, Letenneur L, Veyret B, Dulon D.	2004-10-19	No Effect	Pulsed	Simulated		Mobile Phone GSM Simulated	https://www.ncbi.nlm.nih.gov/pubmed/15726845	UHF (300 MHz-3 GHz) studies	RNRT research programme (National Network for Research on Telecommunications)	0	1
1232	Electromagnetic treatment to old Alzheimer's mice reverses beta-amyloid deposition, modifies cerebral blood flow, and provides selected cognitive benefit.	Arendash GW, Mori T, Dorsey M, Gonzalez R, Tajiri N, Borlongan C.	2012-04-01	Effect	Pulsed	Simulated		Mobile Phone GSM Simulated	https://www.emf-portal.org/en/article/20698	UHF (300 MHz-3 GHz) studies	Florida Alzheimer's Disease Research Center (ADRC), Tampa, Florida /USF Health Byrd Alzheimer's Institute, USA	0	1
1233	Immunohistopathologic demonstration of deleterious effects on growing rat testes of radiofrequency waves emitted from conventional Wi-Fi devices	Atasoy HI, Gunal MY, Atasoy P, Elgun S, Bugdayci G.	2013-04-01	Effect	Pulsed	Real	1	WiFi	https://www.emf-portal.org/en/article/20439	UHF (300 MHz-3 GHz) studies	Self funded	0	1
1235	900 MHz pulse-modulated radiofrequency radiation induces oxidative stress on heart, lung, testis and liver tissues	Esmekaya MA, Ozer C, Seyhan N.	2011-03-01	Effect	Pulsed		1	Simulated by a signal generator	https://www.ncbi.nlm.nih.gov/pubmed/21460416	UHF (300 MHz-3 GHz) studies	Not Stated	0	1
1236	Pulse modulated 900 MHz radiation induces hypothyroidism and apoptosis in thyroid cells: a light, electron microscopy and immunohistochemical study	Esmekaya MA, Seyhan N, Ömeroğlu S.	2010-09-01	Effect	Pulsed			RF Signal Generator	https://www.ncbi.nlm.nih.gov/pubmed/20807179	UHF (300 MHz-3 GHz) studies	Research Funds of Gazi University	0	1
1237	Does MW Radiation Affect Gene Expression, Apoptotic Level, and Cell Cycle Progression of Human SH-SY5Y Neuroblastoma Cells?	Kayhan H, Esmekaya MA, Saglam AS, Tuysuz MZ, Canseven AG, Yagci AM, Seyhan N.	2016-06-03	Effect	Pulsed			Simulated by a signal generator	https://www.ncbi.nlm.nih.gov/pubmed/27260669	UHF (300 MHz-3 GHz) studies	Not Stated	1	0
1238	Mutagenic and morphologic impacts of 1.8GHz radiofrequency radiation on human peripheral blood lymphocytes (hPBLs) and possible protective role of pre-treatment with Ginkgo biloba (EGb 761)	Esmekaya MA, Aytekin E, Ozgur E, Güler G, Ergun MA, Omeroğlu S, Seyhan N.	2011-12-01	Effect	Pulsed			RF Signal Generator	https://www.ncbi.nlm.nih.gov/pubmed/22014767	UHF (300 MHz-3 GHz) studies	Not Stated	1	0
1240	Fatigue-induced changes in muscle fiber action potentials estimated by wavelet analysis	Vukova T, Vydevska-Chichova M, Radicheva N.	2008-06-01	Effect	Continuous			RF Signal Generator	https://www.ncbi.nlm.nih.gov/pubmed/17287133	UHF (300 MHz-3 GHz) studies	Not Stated	1	0
1242	Health Risks of Electromagnetic Radiation from Mobile Phone on Brain of Rats	Awad SM, Hassan N.	2008-06-01	Effect	Continuous	Simulated	1	Mobile Phone GSM Simulated	https://www.researchgate.net/publication/228361169_Health_Risks_of_Electromagnetic_Radiation_from_Mobile_Phone_on_Brain_of_Rats	UHF (300 MHz-3 GHz) studies		0	1
1245	Oxidative stress effects on the central nervous system of rats after acute exposure to ultra high frequency electromagnetic fields.	Ferreira AR, Bonatto F, de Bittencourt Pasquali MA, Polydoro M, Dal-Pizzol F, Fernández C, de Salles AA, Moreira JC.	2006-09-01	No Effect	Pulsed	Real		Mobile Phone	https://www.ncbi.nlm.nih.gov/pubmed/16715528	UHF (300 MHz-3 GHz) studies	Ministry of Science, Technology, Innovation and Communications	0	1
1249	Effects of exposure to 2.45 Ghz microwave radiation on male rat reproductive system	Aweda, MA, Usikalu RM, Awobajo FO.	2011-01-06	Effect	Not Stated			RF Signal Generator	http://www.journalcra.com/article/effects-exposure-245-ghz-microwave-radiation-male-rat-reproductive-system	UHF (300 MHz-3 GHz) studies	Third World Organization for Women in Science (Trieste, Italy)	0	1
1253	The effect of radiofrequency radiation on DNA and lipid damage in female and male infant rabbits	Guler G, Tomruk A, Ozgur E, Sahin D, Sepici A, Altan N, Seyhan N.	2012-04-01	Effect	Pulsed	Simulated	1	Mobile Phone GSM Simulated	https://www.ncbi.nlm.nih.gov/pubmed/22145622	UHF (300 MHz-3 GHz) studies	Gazi University Research Foundation	0	1
1254	GSM modulated radiofrequency radiation does not affect 6-sulfatoxymelatonin excretion of rats	Bakos J, Kubinyi G, Sinay H, Thuróczy G.	2003-12-01	No Effect	Pulsed	Simulated		Mobile Phone GSM Simulated	https://www.emf-portal.org/en/article/10368	UHF (300 MHz-3 GHz) studies	Hungarian Ministry of Welfare and Hungarian Telecommunication Co.	0	1
1256	Mobile phone mast effects on common frog (Rana temporaria) tadpoles: the city turned into a laboratory	Balmori A.	2010-06-01	Effect	Pulsed	Real		Mobile Phone Base Station	https://www.emf-portal.org/en/article/18365	UHF (300 MHz-3 GHz) studies	Not Stated	0	1
1258	900 MHz radiofrequency-induced histopathologic changes and oxidative stress in rat endometrium: protection by vitamins E and C	Guney M, Ozguner F, Oral B, Karahan N, Mungan T.	2007-08-01	Effect	Pulsed		1	Simulated by a signal generator	https://www.ncbi.nlm.nih.gov/pubmed/18536493	UHF (300 MHz-3 GHz) studies	Not Stated	0	1
1259	Whole body exposure to 2.4GHz WIFI signals: Effects on cognitive impairment in adult triple transgenic mouse models of Alzheimer's disease (3xTg-AD)	Banaceur S, Banasr S, Sakly M, Abdelmelek H.	2013-03-01	Effect	Pulsed	Real		WiFi	https://www.emf-portal.org/en/article/21511	UHF (300 MHz-3 GHz) studies	Not Stated	0	1
1265	Is human saliva an indicator of the adverse health effects of using mobile phones?	Hamzany Y, Feinmesser R, Shpitzer T, Mizrachi A, Hilly O, Hod R, Bahar G, Otradnov I, Gavish M, Nagler RM.	2013-01-16	Effect	Pulsed	Real	1	Mobile Phone	https://www.ncbi.nlm.nih.gov/pubmed/22894683	UHF (300 MHz-3 GHz) studies	Not Stated	0	1
1266	Effect of whole-body exposure to high-frequency electromagnetic field on the brain electrogeny in neurodefective and healthy mice	Barcal J, Cendelín J, Vozeh F, Zalud V.	2005-02-01	Effect	Pulsed			Microwave	https://www.emf-portal.org/en/article/12229	UHF (300 MHz-3 GHz) studies	European Union (EU)/European Commission and Grant Agency of Czech Republic	0	1
1267	Effect of whole-body exposure to high-frequency electromagnetic field on the brain cortical and hippocampal activity in mouse experimental model	Barcal J, Cendelín J, Vozeh F, Zalud V.	2007-09-01	Effect	Pulsed			Microwave	https://www.emf-portal.org/en/article/12229	UHF (300 MHz-3 GHz) studies	European Union (EU)/European Commission and Grant Agency of Czech Republic	0	1
1268	Chronic exposure to a GSM-like signal (mobile phone) does not stimulate the development of DMBA-induced mammary tumors in rats: results of three consecutive studies	Bartsch H, Bartsch C, Seebald E, Deerberg F, Dietz K, Vollrath L, Mecke D.	2002-03-01	No Effect	Pulsed	Real		Mobile Phone 2G GSM	https://www.emf-portal.org/en/article/8550	UHF (300 MHz-3 GHz) studies	Deutsche Telekom/T-Systems, Germany	0	1
1269	Effect of chronic exposure to a GSM-like signal (mobile phone) on survival of female Sprague-Dawley rats: Modulatory effects by month of birth and possibly stage of the solar cycle	Bartsch H, Küpper H, Scheurlen U, Deerberg F, Seebald E, Dietz K, Mecke D, Probst H, Stehle T, Bartsch C.	2010-01-01	Uncertain Effect	Pulsed			Microwave	https://www.emf-portal.org/en/article/18588	UHF (300 MHz-3 GHz) studies	Swisscom, Deutsche Telekom/T-Systems, Germany, Forschungsgemeinschaft Funk e.V. (FGF) (Research Association for Radio Applications), Germany	0	1
1270	900 MHz electromagnetic field exposure affects qualitative and quantitative features of hippocampal pyramidal cells in the adult female rat	Bas O, Odaci E, Kaplan S, Acer N, Ucok K, Colakoglu S.	2009-04-10	Effect	Continuous			Microwave	https://www.emf-portal.org/en/article/16815	UHF (300 MHz-3 GHz) studies	Not Stated	0	1
1271	Chronic prenatal exposure to the 900 megahertz electromagnetic field induces pyramidal cell loss in the hippocampus of newborn rats	Bas O, Odaci E, Mollaoglu H, Ucok K, Kaplan S.	2009-07-01	Effect	Continuous			Microwave	https://www.emf-portal.org/en/article/17435	UHF (300 MHz-3 GHz) studies	Not Stated	0	1
1272	Toxicologic Study of Electromagnetic Radiation Emitted by Television and Video Display Screens and Cellular Telephones on Chickens and Mice ( Mice outcome)	Bastide M, Youbicier-Simo BJ, Lebecq JC, Giaimis J.	2001-01-01	Effect	Pulsed	Real		Mobile Phone 2G GSM	https://www.emf-portal.org/en/article/24601	UHF (300 MHz-3 GHz) studies	Not Stated	0	1
1274	Effects of exposing chicken eggs to a cell phone in "call" position over the entire incubation period	Batellier F, Couty I, Picard D, Brillard JP.	2008-04-01	Effect	Pulsed	Real		Mobile Phone 2G GSM	https://www.emf-portal.org/en/article/15655	UHF (300 MHz-3 GHz) studies	Bouygues Telecom, France	0	1
1275	Responses of neurons to an amplitude modulated microwave stimulus	Beason RC, Semm P.	2002-11-29	Effect	Pulsed	Simulated		Mobile Phone GSM Simulated	https://www.ncbi.nlm.nih.gov/pubmed/12429376	UHF (300 MHz-3 GHz) studies	Deutsche Telekom and the Geneseo Foundation.	0	1
1277	Prenatal exposure to 900 MHz, cell-phone electromagnetic fields had no effect on operant-behavior performances of adult rats	Bornhausen M, Scheingraber H.	2000-12-01	No Effect	Pulsed	Real		Mobile Phone Base Station	https://www.emf-portal.org/en/article/4919	UHF (300 MHz-3 GHz) studies	Deutsche Telekom/T-Systems, Germany	0	1
1278	Effects of 900MHz radiofrequency on corticosterone, emotional memory and neuroinflammation in middle-aged rats	Bouji M, Lecomte A, Hode Y, de Seze R, Villégier AS.	2012-06-01	Effect	Pulsed	Real		Mobile Phone GSM	https://www.emf-portal.org/en/article/20531	UHF (300 MHz-3 GHz) studies	French Ministry of Ecology (MEDDTL).	0	1
1279	Effect of an acute 900 MHz GSM exposure on glia in the rat brain: A time-dependent study	Brillaud E, Piotrowski A, de Seze R.	2007-08-16	Effect	Pulsed	Simulated		Mobile Phone GSM Simulated	https://www.ncbi.nlm.nih.gov/pubmed/17624651	UHF (300 MHz-3 GHz) studies	European program RAMP 2001 and the French ministry of Ecology and Sustainable Development	0	1
1280	Effects of GSM-like radiofrequency on distortion product otoacoustic emissions of rabbits: comparison of infants versus adults	Budak GG, Muluk NB, Oztürk GG, Budak B, Apan A, Seyhan N, Sanli C.	2009-05-27	Effect	Pulsed	Simulated		Mobile Phone GSM Simulated	https://www.emf-portal.org/en/article/16965	UHF (300 MHz-3 GHz) studies		0	1
1281	Effects of intrauterine and extrauterine exposure to GSM-like radiofrequency on distortion product otoacoustic emissions in infant male rabbits	Budak GG, Muluk NB, Budak B, Oztürk GG, Apan A, Seyhan N.	2009-03-01	Effect	Pulsed	Simulated		Mobile Phone GSM Simulated	https://www.ncbi.nlm.nih.gov/pubmed/19108901	UHF (300 MHz-3 GHz) studies	Not Stated	0	1
1282	Effects of GSM-like radiofrequency on distortion product otoacoustic emissions in pregnant adult rabbits	Budak GG, Muluk NB, Budak B, Oztürk GG, Apan A, Seyhan N.	2009-08-01	Effect	Pulsed	Simulated		Mobile Phone GSM Simulated	https://www.emf-portal.org/en/article/17147	UHF (300 MHz-3 GHz) studies	Not Stated	0	1
1283	Effects of 837 and 1950MHz radiofrequency radiation exposure alone or combined on oxidative stress in MCF10A cells	Hong MN, Kim BC, Ko YG, Lee YS, Hong SC, Kim T, Pack JK, Choi HD, Kim N, Lee JS.	2012-04-30	No Effect	Pulsed			Simulated by a signal generator	https://www.ncbi.nlm.nih.gov/pubmed/22549623	UHF (300 MHz-3 GHz) studies	Korea Communications Commission	1	0
1284	Erythropoietic changes in rats after 2.45 GHz nonthermal irradiation	Busljeta I, Trosic I, Milkovic-Kraus S.	2004-12-01	Effect	Continuous			RF Signal Generator	https://www.emf-portal.org/en/article/11630	UHF (300 MHz-3 GHz) studies	Ministry of Science, Education and Sports, Republic of Croatia	0	1
1285	GSM 900 MHz radiation inhibits ants' association between food sites and encountered cues	Cammaerts MC, De Doncker P, Patris X, Bellens F, Rachidi Z, Cammaerts D.	2012-06-01	Effect	Pulsed	Real		Mobile Phone Base Station	https://www.emf-portal.org/en/article/20151	UHF (300 MHz-3 GHz) studies	Not Stated	0	1
1286	Changes in Paramecium caudatum (Protozoa) near a switched-on GSM telephone	Cammaerts MC, Debeir O, Cammaerts R.	2011-03-01	Effect	Pulsed	Real		Mobile Phone GSM	https://www.emf-portal.org/en/article/19261	UHF (300 MHz-3 GHz) studies	Not Stated	1	0
1287	Evaluation of parameters of oxidative stress after in vitro exposure to FMCW- and CDMA-modulated radiofrequency radiation fields	Hook GJ, Spitz DR, Sim JE, Higashikubo R, Baty JD, Moros EG, Roti Roti JL.	2004-11-01	No Effect	Continuous	Real		Mobile Phone FDMA (Frequency Division Multiple Access)	https://www.ncbi.nlm.nih.gov/pubmed/15624304	UHF (300 MHz-3 GHz) studies	Major portion of this work was supported by a contract from Motorola Incorporated. Funding also from Old Dominion University	1	0
1288	Ornithine decarboxylase activity is affected in primary astrocytes but not in secondary cell lines exposed to 872 MHz RF radiation	Hoyto A, Juutilainen J, Naarala J.	2007-03-05	Effect	Pulsed			Simulated by a signal generator	https://www.ncbi.nlm.nih.gov/pubmed/17487676	UHF (300 MHz-3 GHz) studies	Tekes (the Finnish Funding Agency for Technology and Innovation), Mobile Manufacturers’ Forum, GSM Association, and Finnish Cultural Foundation, Regional Fund of North-Savo	1	0
1293	Induction of adaptive response: Pre-exposure of mice to 900 MHz radiofrequency fields reduces hematopoietic damage caused by subsequent exposure to ionising radiation	Cao Y, Xu Q, Jin ZD, Zhou Z, Nie JH, Tong J.	2007-07-01	Effect	Continuous			Microwave	https://www.emf-portal.org/en/article/19002	UHF (300 MHz-3 GHz) studies	National Natural Science Foundation (NSFC), China / Ministry of Science and Technology (MOST), China / Soochow University, China	0	1
1294	Ginkgo biloba prevents mobile phone-induced oxidative stress in rat brain	Ilhan A, Gurel A, Armutcu F, Kamisli S, Iraz M, Akyol O, Ozen S.	2004-02-01	Effect	Pulsed	Real	1	Mobile Phone GSM	https://www.ncbi.nlm.nih.gov/pubmed/14734207	UHF (300 MHz-3 GHz) studies	Not Stated	0	1
1297	A study of neurotoxic biomarkers, c-fos and GFAP after acute exposure to GSM radiation at 900MHz in the picrotoxin model of rat brains	Carballo-Quintás M1, Martínez-Silva I, Cadarso-Suárez C, Alvarez-Figueiras M, Ares-Pena FJ, López-Martín E.	2011-04-16	Effect	Pulsed			Microwave	https://www.emf-portal.org/en/article/19230	UHF (300 MHz-3 GHz) studies	Xunta de Galicia, Spain / Ministerio Espanol de Ciencia y Innovación (Ministry of Science and Innovation), Spain	0	1
1298	Whole-body exposure to 2.45 GHz electromagnetic fields does not alter radial-maze performance in rats	Cassel JC, Cosquer B, Galani R, Kuster N.	2005-05-12	No Effect	Pulsed			RF Signal Generator	https://www.ncbi.nlm.nih.gov/pubmed/15325777	UHF (300 MHz-3 GHz) studies	Mobile Manufacturers Forum (MMF), the GSM Association (GSM A), the ULP, and Centre Nationnal de la Recherche Scientifique (CNRS).	0	1
1299	An Evaluation of the Effects of Long-term Cell Phone Use on the Testes Via Light and Electron Microscope Analysis	Celik S, Aridogan IA, Izol V, Erdoğan S, Polat S, Doran S.	2012-02-02	Uncertain Effect	Pulsed	Real		Mobile Phone GSM	https://www.ncbi.nlm.nih.gov/pubmed/22196412	UHF (300 MHz-3 GHz) studies	Academic Research Projects Unit of the University of Çukurova	0	1
1302	The prophylactic effect of vitamin C on induced oxidative stress in rat testis following exposure to 900 MHz radio frequency wave generated by a BTS antenna model.	Jelodar G, Nazifi S, Akbari A.	2013-09-01	Effect	Not Stated		1	Simulated by a signal generator	https://www.ncbi.nlm.nih.gov/pubmed/23323690	UHF (300 MHz-3 GHz) studies	No Conflict of Interest Stated	0	1
1304	The influence of microwave radiation from cellular phone on fetal rat brain	Jing J, Yuhua Z, Xiao-qian Y, Rongping J, Dong-mei G, Xi C.	2012-03-01	Effect	Pulsed	Real	1	Mobile Phone	https://www.ncbi.nlm.nih.gov/pubmed/22268709	UHF (300 MHz-3 GHz) studies	Grants from ASRF “A-803P” and ISTC No.#1571P projects. No Conflict of Interest.	0	1
1305	2.45 GHz (CW) microwave irradiation alters circadian organization, spatial memory, DNA structure in the brain cells and blood cell counts of male mice, Mus musculus	Chaturvedi CM, Singh VP, Singh P, Basu P, Singaravel M, Shukla RK, Dhawan A, Pati AK, Gangwar RK, Singh SP.	2011-03-15	Effect	Continuous			RF Signal Generator	https://www.emf-portal.org/en/article/19608	UHF (300 MHz-3 GHz) studies	Research grant from the Council of Scientific and Industrial Research, New Delhi, India	0	1
1306	Comparison of biological effects between continuous and intermittent exposure to GSM-900-MHz mobile phone radiation: detection of apoptotic cell-death features	Chavdoula ED, Panagopoulos DJ, Margaritis LH.	2010-07-19	Effect	Pulsed	Real		Mobile Phone GSM	https://www.emf-portal.org/en/article/18222	UHF (300 MHz-3 GHz) studies	Research Grants from the National and Kapodistrian University of Athens	0	1
1308	Influence of Radiofrequency Radiation on Chromosome Aberrations in CHO Cells and Its Interaction with DNA-Damaging Agents	Kerbacher JJ, Meltz ML, Erwin DN.	1990-09-03	Uncertain Effect	Pulsed			RF Signal Generator	https://www.ncbi.nlm.nih.gov/pubmed/2120738	UHF (300 MHz-3 GHz) studies	This research was supported by USAF Contracts No. F33615-84-0604 and F33615-87-C-06 10. Military Funded	1	0
1310	900-MHz microwave radiation promotes oxidation in rat brain	Kesari KK, Kumar S, Behari J.	2011-11-02	Effect	Pulsed	Real	1	Mobile Phone	https://www.ncbi.nlm.nih.gov/pubmed/22047460	UHF (300 MHz-3 GHz) studies	Indian Council for Medical Research (ICMR)	0	1
1311	Assessment of oxidant/antioxidant status in saliva of cell phone users	Khalil AM, Abu Khadra KM, Aljaberi AM, Gagaa MH, Issa HS.	2013-06-19	Uncertain Effect	Pulsed	Real	1	Mobile Phone GSM	https://www.ncbi.nlm.nih.gov/pubmed/23781989	UHF (300 MHz-3 GHz) studies	Deanship of the Graduate Studies, Yarmouk University	0	1
1312	8-Oxo-7, 8-dihydro-2'-deoxyguanosine as a biomarker of DNA damage by mobile phone radiation	Khalil AM, Gagaa MH, Alshamali AM.	2012-01-16	Effect	Continuous	Simulated	1	Mobile Phone GSM Simulated	https://www.ncbi.nlm.nih.gov/pubmed/22249391	UHF (300 MHz-3 GHz) studies	Deanship of the Graduate Studies, Yarmouk University	0	1
1313	In vitro assessment of clastogenicity of mobile-phone radiation (835 MHz) using the alkaline comet assay and chromosomal aberration test	Kim JY, Hong SY, Lee YM, Yu SA, Koh WS, Hong JR, Son T, Chang SK, Lee M.	2008-01-23	Effect	Not Stated			RF Signal Generator Transverse and Electromagnetic (TEM) Cell	https://www.ncbi.nlm.nih.gov/pubmed/18214898	UHF (300 MHz-3 GHz) studies	Contract grant sponsor: BIT Wireless Communication Devices Research Centre, Soonchunhyang University.	1	0
1314	Effect of Electromagnetic Pulses (EMP) on associative learning in mice and a preliminary study of mechanism	Chen YB, Li J, Liu JY, Zeng LH, Wan Y, Li YR, Ren D, Guo GZ.	2011-12-01	Effect	Pulsed			Microwave	https://www.ncbi.nlm.nih.gov/pubmed/21929296	UHF (300 MHz-3 GHz) studies	Health Research Foundation, Kyoto 606-8225, Japan) for providing us with TMG. is study was supported by National Natural Science Foundation of China	0	1
1315	The influence of 1800 MHz GSM-like signals on blood chemistry and oxidative stress in non-pregnant and pregnant rabbits	Kismali G, Ozgur E, Guler G, Akcay A, Sel T, Seyhan N.	2012-05-01	Effect	Pulsed			Simulated by a signal generator	https://www.ncbi.nlm.nih.gov/pubmed/22280439	UHF (300 MHz-3 GHz) studies	Gazi University Research Foundation	0	1
1317	The effects of antioxidants on testicular apoptosis and oxidative stress produced by cell phones	KOÇ A, ÜNAL D, ÇİMENTEPE E, BAYRAK O, KARATAŞ OF, YILDIRIM ME, BAYRAK R, AYDIN M.	2013-01-18	Effect	Pulsed	Real	1	Mobile Phone	http://dergipark.ulakbim.gov.tr/tbtkmedical/article/view/5000024749	UHF (300 MHz-3 GHz) studies	Scientific Research Fund of Fatih University	0	1
1318	Melatonin modulates 900 Mhz microwave-induced lipid peroxidation changes in rat brain	Koylu H, Mollaoglu H, Ozguner F, Naziroglu M, Delibas N.	2006-06-01	Effect	Pulsed		1	Simulated by a signal generator	https://www.ncbi.nlm.nih.gov/pubmed/16898263	UHF (300 MHz-3 GHz) studies	Not Stated	0	1
1320	Effects of 1950 MHz radiofrequency electromagnetic fields on Aβ processing in human neuroblastoma and mouse hippocampal neuronal cells	Park J, Kwon JH, Kim N, Song K.	2017-10-06	Effect	Pulsed	Real		Mobile Phone W-CDMA Simulated	https://www.ncbi.nlm.nih.gov/pubmed/29040655	UHF (300 MHz-3 GHz) studies	National Research Foundation of Korea (NRF) funded by the Ministry of Science, ICT & Future Planning and by Korea Mobile EMF consortium	1	0
1321	Influence of electromagnetic fields on bone fracture in rats: role of CAPE	Cicek E, Gokalp O, Varol R, Cesur G.	2009-04-01	Effect	Continuous			Microwave	https://www.emf-portal.org/de/article/17314	UHF (300 MHz-3 GHz) studies	Not Stated	0	1
1322	Radial arm maze performance of rats following repeated low level microwave radiation exposure	Cobb BL, Jauchem JR, Adair ER.	2004-01-01	No Effect	Pulsed			RF Signal Generator	https://www.emf-portal.org/en/article/10461	UHF (300 MHz-3 GHz) studies	Not Stated - Researchers are associated with the US Airforce	0	1
1323	Neural and behavioral teratological evaluation of rats exposed to ultra-wideband electromagnetic fields	Cobb BL, Jauchem JR, Mason PA, Dooley MP, Miller SA, Ziriax JM, Murphy MR.	2000-10-01	Uncertain Effect	Pulsed			Microwave	https://www.emf-portal.org/en/article/3934	UHF (300 MHz-3 GHz) studies	Not Stated - Authors associated with US Airforce	0	1
1324	Effects of electromagnetic radiation from 3G mobile phone on heart rate, blood pressure and ECG parameters in rats	Colak C, Parlakpinar H, Ermis N, Tagluk ME, Colak C, Sarihan E, Dilek OF, Turan B, Bakir S, Acet A.	2012-08-01	No Effect	Pulsed	Real		Mobile Phone 3G GSM	https://www.emf-portal.org/en/article/19761	UHF (300 MHz-3 GHz) studies	The Scientific Research Fund of Inonu University, Malatya, Turkey	0	1
1327	Whole-body exposure to 2.45 GHz electromagnetic fields does not alter 12-arm radial-maze with reduced access to spatial cues in rats	Cosquer B, Kuster N, Cassel JC.	2005-03-23	No Effect	Pulsed			RF Signal Generator	https://www.emf-portal.org/en/article/12007	UHF (300 MHz-3 GHz) studies	GSM Association, UK/Ireland & Mobile Manufacturers Forum (MMF), Belgium	0	1
1328	Blood-brain barrier and electromagnetic fields: effects of scopolamine methylbromide on working memory after whole-body exposure to 2.45 GHz microwaves in rats	Cosquer B, Vasconcelos AP, Fröhlich J, Cassel JC.	2005-03-21	No Effect	Pulsed			RF Signal Generator	https://www.emf-portal.org/en/article/12008	UHF (300 MHz-3 GHz) studies	Work was funded by MMF and GSM Industry associations	0	1
1329	Neurophysiologic effects at low level 1.8 GHz radiofrequency field exposure: a multiparametric approach on freely moving rats	Crouzier D, Debouzy JC, Bourbon F, Collin A, Perrin A, Testylier G.	2006-08-01	Uncertain Effect	Pulsed	Simulated		Mobile Phone GSM Simulated	https://www.emf-portal.org/en/article/14068	UHF (300 MHz-3 GHz) studies	Délégation Générale pour l'Armement (DGA; part of Ministère de la Défense (Ministry of Defense)), France	0	1
1330	The effect of electromagnetic radiation in the mobile phone range on the behaviour of the rat	Daniels WM, Pitout IL, Afullo TJ, Mabandla MV.	2009-10-13	Uncertain Effect	Pulsed			Microwave	https://www.emf-portal.org/en/article/17611	UHF (300 MHz-3 GHz) studies	Not Stated	0	1
1331	Do cellular phones alter blood parameters and birth weight of rats?	Dasdag S, Akdag Z, Ayyildiz O, Demirtas OC, Yayla M, Sert C.	2009-07-07	Uncertain Effect	Pulsed			Microwave	https://www.emf-portal.org/en/article/9424	UHF (300 MHz-3 GHz) studies	Not Stated	0	1
1332	Effects of microwaves on the phagocytic activity of variously treated rat macrophages	Dasdag S, Sert C, Akdag Z, Oflazoglu HD.	2001-01-01	Effect	Not Stated			RF Signal Generator	https://www.tandfonline.com/doi/full/10.1081/JBC-100104141	UHF (300 MHz-3 GHz) studies	Not Stated	0	1
1333	Does 900 MHz GSM Mobile Phone Exposure Affect Rat Brain?	Dasdag S, Akdag Z, Aksen F.	2004-01-01	Effect	Pulsed	Real	1	Mobile Phone	https://www.emf-portal.org/en/article/12083	UHF (300 MHz-3 GHz) studies	Not Stated	0	1
1335	Mobile phone exposure does not induce apoptosis on spermatogenesis in rats	Dasdag S, Akdag MZ, Ulukaya E, Uzunlar AK, Yegin D.	2007-07-20	No Effect	Pulsed	Simulated		Mobile Phone GSM Simulated	https://www.emf-portal.org/en/article/15455	UHF (300 MHz-3 GHz) studies	Not Stated	0	1
1336	Single- and double-strand DNA breaks in rat brain cells after acute exposure to radiofrequency electromagnetic radiation	Lai H, Singh NP.	1996-04-01	Effect	Pulsed			RF Signal Generator	https://www.ncbi.nlm.nih.gov/pubmed/8627134	UHF (300 MHz-3 GHz) studies	National Institute of Environmental Health Sciences	0	1
1337	Melatonin and a spin-trap compound block radiofrequency electromagnetic radiation-induced DNA strand breaks in rat brain cells	Lai H, Singh NP.	1997-01-28	Effect	Pulsed			RF Signal Generator	https://www.ncbi.nlm.nih.gov/pubmed/9261542	UHF (300 MHz-3 GHz) studies	National Institute of Environmental Health Science	0	1
1338	ROS release and Hsp70 expression after exposure to 1,800 MHz radiofrequency electromagnetic fields in primary human monocytes and lymphocytes	Lantow M, Lupke M, Frahm J, Mattsson MO, Kuster N, Simko M.	2006-03-22	Uncertain Effect	Continuous			Simulated by a signal generator	https://www.ncbi.nlm.nih.gov/pubmed/16552570	UHF (300 MHz-3 GHz) studies	German Federal Office for Radiation Protection	1	0
1339	Low-intensity microwave irradiation does not substantially alter gene expression in late larval and adult Caenorhabditis elegans	Dawe AS, Bodhicharla RK, Graham NS, May ST, Reader T, Loader B, Gregory A, Swicord M, Bit-Babik G, de Pomerai DI.	2009-12-01	No Effect	Continuous			Microwave	https://www.emf-portal.org/en/article/17197	UHF (300 MHz-3 GHz) studies	Mobile Telecommunications and Health Research (MTHR), UK	0	1
1340	Continuous wave and simulated GSM exposure at 1.8 W/kg and 1.8 GHz do not induce hsp16-1 heat-shock gene expression in Caenorhabditis elegans	Dawe AS, Nylund R, Leszczynski D, Kuster N, Reader T, De Pomerai DI.	2008-02-01	No Effect	Continuous			Microwave	https://www.emf-portal.org/en/article/15087	UHF (300 MHz-3 GHz) studies	Mobile Telecommunications and Health Research (MTHR), UK, STUK (Radiation and Nuclear Safety Authority), Helsinki, Finland, IT'IS Foundation (Foundation for Research on Information Technologies in Society), Zurich, Switzerland	0	1
1341	A small temperature rise may contribute towards the apparent induction by microwaves of heat-shock gene expression in the nematode Caenorhabditis Elegans	Dawe AS, Smith B, Thomas DW, Greedy S, Vasic N, Gregory A, Loader B, de Pomerai DI.	2006-02-01	Uncertain Effect	Continuous			Microwave	https://www.ncbi.nlm.nih.gov/pubmed/16342196	UHF (300 MHz-3 GHz) studies	UK Mobile Telecommunications Health Research	0	1
1342	Effects of head-only exposure of rats to GSM-900 on blood-brain barrier permeability and neuronal degeneration	de Gannes FP, Billaudel B, Taxile M, Haro E, Ruffié G, Lévêque P, Veyret B, Lagroye I.	2009-09-01	No Effect	Continuous			Microwave	https://www.emf-portal.org/en/article/17360	UHF (300 MHz-3 GHz) studies	France Telecom Bouygues Telecom, France, Centre National de la Recherche Scientifique (CNRS; French National Center for Scientific Research), France	0	1
1343	A confirmation study of Russian and Ukrainian data on effects of 2450 MHz microwave exposure on immunological processes and teratology in rats	de Gannes FP, Taxile M, Duleu S, Hurtier A, Haro E, Geffard M, Ruffié G, Billaudel B, Lévêque P, Dufour P, Lagroye I, Veyret B.	2009-11-01	No Effect	Continuous			Magnetron	https://www.emf-portal.org/en/article/17481	UHF (300 MHz-3 GHz) studies	French National Center for Scientific Research), FranceGSM Association, UK/Ireland. Mobile Manufacturers Forum (MMF), Belgium. Health and Radiofrequencies Foundation (La Fondation Santé et Radiofréquences), France	0	1
1344	Microwave radiation induces a heat-shock response and enhances growth in the nematode Caenorhabditis elegans	de Pomerai DI, Daniells C, David H, Allan J, Duce I, Mutwakil M, Thomas D, Sewell P, Tattersall J, Jones D, Candido P	2000-11-01	Effect	Continuous			Microwave	https://www.emf-portal.org/en/article/6611	UHF (300 MHz-3 GHz) studies	Wellcome Trust, UK, Defence Evaluation and Research Agency (DERA), UK	0	1
1346	Microwave radiation can alter protein conformation without bulk heating	de Pomerai DI, Smith B, Dawe A, North K, Smith T, Archer DB, Duce IR, Jones D, Candido EP.	2003-05-01	Effect	Continuous			Microwave	https://www.emf-portal.org/en/article/10335	UHF (300 MHz-3 GHz) studies	Mobile Telecommunications and Health Research (MTHR), UK, Canadian Institutes of Health Research (CIHR), Natural Sciences and Engineering Research Council (NERSC) of Canada Defence Evaluation and Research Agency (DERA), UK	1	0
1347	Free radical release and HSP70 expression in two human immune-relevant cell lines after exposure to 1800 MHz radiofrequency radiation	Lantow M, Schuderer J, Hartwig C, Simkó M.	2006-01-01	Uncertain Effect	Continuous			Simulated by a signal generator	https://www.ncbi.nlm.nih.gov/pubmed/16392966	UHF (300 MHz-3 GHz) studies	German Federal Office for Radiation Protection	1	0
1348	The role of coherence time in the effect of microwaves on ornithine decarboxylase activity	Litovitz TA, Krause D, Penafiel M, Elson EC, Mullins JM.	1993-03-22	Effect	Amplitude Modulation			Simulated by a signal generator	https://www.ncbi.nlm.nih.gov/pubmed/8285913	UHF (300 MHz-3 GHz) studies	Walter Reed Institute of Research, Department of the Army.	1	0
1350	Effects of third generation mobile phone-emitted electromagnetic radiation on oxidative stress parameters in eye tissue and blood of rats	Demirel S, Doganay S, Turkoz Y, Dogan Z, Turan B, Firat PG.	2012-06-01	No Effect	Pulsed	Real		Mobile Phone 3G GSM	https://www.emf-portal.org/en/article/20259	UHF (300 MHz-3 GHz) studies	Not Stated	0	1
1353	Reactive oxygen species formation and apoptosis in human peripheral blood mononuclear cell induced by 900 MHz mobile phone radiation	Lu YS, Huang BT, Huang YX.	2012-06-14	Effect	Pulsed	Simulated	1	GSM Base Station Simulation	https://www.ncbi.nlm.nih.gov/pubmed/22778799?dopt=Abstract	UHF (300 MHz-3 GHz) studies	Not Stated	1	0
1355	Enhancement of chemically induced reactive oxygen species production and DNA damage in human SH-SY5Y neuroblastoma cells by 872 MHz radiofrequency radiation	Luukkonen J, Hakulinen P, Mäki-Paakkanen J, Juutilainen J, Naarala J.	2008-12-24	Effect	Continuous			RF Signal Generator	https://www.ncbi.nlm.nih.gov/pubmed/19135463	UHF (300 MHz-3 GHz) studies	Finnish Funding Agency for Technology and Innovation TEKES; Finnish mobile phone manufacturers and operators; the Finnish Ministry of Education	1	0
1356	Cytogenetic investigations on microwaves emitted by a 455.7 MHz car phone	Maes A, Collier M, Verschaeve L.	2000-01-01	Uncertain Effect	Pulsed			Car Phone	https://www.emf-portal.org/en/article/4988	UHF (300 MHz-3 GHz) studies	Not Known Proximus, Belgium telecommunications network provided the exposure facility and the dosimetry.	1	0
1357	Radio frequency electromagnetic radiation (RF-EMR) from GSM (0.9/1.8GHz) mobile phones induces oxidative stress and reduces sperm motility in rats	Mailankot M, Kunnath AP, Jayalekshmi H, Koduru B, Valsalan R.	2009-03-06	Effect	Pulsed	Real	1	Mobile Phone GSM	https://www.ncbi.nlm.nih.gov/pubmed/19578660	UHF (300 MHz-3 GHz) studies	Not Stated	0	1
1358	Reactive oxygen species elevation and recovery in Drosophila bodies and ovaries following short-term and long-term exposure to DECT base EMF	Manta AK, Stravopodis DJ, Papassideri IS, Margaritis LH.	2013-06-19	Effect	Pulsed	Real	1	DECT Phone	https://www.ncbi.nlm.nih.gov/pubmed/23781995	UHF (300 MHz-3 GHz) studies	EU European Social Fund – ESF; Greek national funds through the Operational Program ‘‘Education and Lifelong Learning’’ of the National Strategic Reference Framework	0	1
1359	Effect of 910-MHz electromagnetic field on rat bone marrow	Demsia G, Vlastos D, Matthopoulos DP.	2004-10-20	Effect	Not Stated			Microwave	https://www.ncbi.nlm.nih.gov/pubmed/15517102	UHF (300 MHz-3 GHz) studies	Not Stated	0	1
1360	Effects of Electromagnetic Radiation Use on Oxidant/Antioxidant Status and DNA Turn-over Enzyme Activities in Erythrocytes and Heart, Kidney, Liver, and Ovary Tissues From Rats: Possible Protective Role of Vitamin C	Devrim E, Ergüder IB, Kılıçoğlu B, Yaykaşlı E, Cetin R, Durak I.	2008-01-01	Effect	Pulsed	Real	1	Mobile Phone GSM	https://www.ncbi.nlm.nih.gov/pubmed/20020924	UHF (300 MHz-3 GHz) studies	Not Stated	0	1
1362	Effects of electromagnetic radiation produced by 3G mobile phones on rat brains: magnetic resonance spectroscopy, biochemical, and histopathological evaluation	Dogan M, Turtay MG, Oguzturk H, Samdanci E, Turkoz Y, Tasdemir S, Alkan A, Bakir S.	2011-06-01	No Effect	Pulsed	Real		Mobile Phone 3G GSM	https://www.emf-portal.org/en/article/19350	UHF (300 MHz-3 GHz) studies	No funding was received in support of this work	0	1
1363	Long-term electromagnetic field treatment enhances brain mitochondrial function of both Alzheimer's transgenic mice and normal mice: a mechanism for electromagnetic field-induced cognitive benefit?	Dragicevic N, Bradshaw PC, Mamcarz M, Lin X, Wang L, Cao C, Arendash GW.	2011-06-30	Effect	Pulsed	Simulated		Mobile Phone GSM Simulated	https://www.emf-portal.org/en/article/19218	UHF (300 MHz-3 GHz) studies	USF Health Byrd Alzheimer's Institute, USA and USF Start-up Funds, USA	0	1
1364	Does head-only exposure to GSM-900 electromagnetic fields affect the performance of rats in spatial learning tasks?	Dubreuil D, Jay T, Edeline JM.	2001-07-27	No Effect	Pulsed	Simulated		Mobile Phone GSM Simulated	https://www.emf-portal.org/en/article/8336	UHF (300 MHz-3 GHz) studies	Ministry of National Education and Research , France and Ministry of Economy, Finance and Industry, France	0	1
1365	Therapeutic approaches of melatonin in microwave radiations-induced oxidative stress-mediated toxicity on male fertility pattern of Wistar rats	Meena R, Kumari K, Kumar J, Rajamani P, Verma HN, Kesari KK.	2013-05-15	Effect	Frequency Modulated		1	Microwave Oven	https://www.ncbi.nlm.nih.gov/pubmed/23676079	UHF (300 MHz-3 GHz) studies	Council for Scientific and Industrial Research	0	1
1366	Effects of 900-MHz electromagnetic field emitted from cellular phone on brain oxidative stress and some vitamin levels of guinea pigs	Meral I, Mert H, Mert N, Deger Y, Yoruk I, Yetkin A, Keskin S.	2007-09-12	Effect	Pulsed	Real	1	Mobile Phone	https://www.ncbi.nlm.nih.gov/pubmed/17674954	UHF (300 MHz-3 GHz) studies	Not Known	0	1
1367	Effects of acute exposure to the radiofrequency fields of cellular phones on plasma lipid peroxide and antioxidase activities in human erythrocytes	Moustafa YM, Moustafa RM, Belacy A, Abou-El-Ela SH, Ali FM.	2001-11-01	Effect	Pulsed	Real	1	Mobile Phone GSM	https://www.ncbi.nlm.nih.gov/pubmed/11516912	UHF (300 MHz-3 GHz) studies	Not Stated	0	1
1368	Head-only exposure to GSM 900-MHz electromagnetic fields does not alter rat's memory in spatial and non-spatial tasks	Dubreuil D, Jay T, Edeline JM.	2003-10-01	No Effect	Pulsed	Simulated		Mobile Phone GSM Simulated	https://www.emf-portal.org/en/article/10326	UHF (300 MHz-3 GHz) studies	France Telecom	0	1
1371	Assessment of DNA Sensitivity and Heat Stress Protein Response (HSP70) in Male Wistar Rat Blood After Exposure to Microwave Radiation	El-Ezabi M.	2010-06-01	Effect	Pulsed	Real		Mobile Phone 2G GSM	https://www.semanticscholar.org/paper/Assessment-of-DNA-Sensitivity-and-Heat-Stress-in-to-El-Ezabi/335b33fbaa1c9c3f7f6de43c4df0984ea13c34fc	UHF (300 MHz-3 GHz) studies	Not Stated	0	1
1372	Effects of electromagnetic field produced by mobile phones on the oxidant and antioxidant status of rats	Elhag MA, Nabil GM, Attia AM.	2007-12-01	Effect	Continuous		1	Microwave	https://www.emf-portal.org/en/article/16650	UHF (300 MHz-3 GHz) studies	Not Stated	0	1
1374	Detection of probable effects of microwave exposure of blood parameters of RBC, PCV and Hb in rat	Esfahani MS, Radmehr B, Kohbodi A.	2007-12-01	Effect	Not Stated			RF Signal Generator	https://www.emf-portal.org/en/article/16658	UHF (300 MHz-3 GHz) studies	Not Stated	0	1
1375	A possible effect of electromagnetic radiation from mobile phone base stations on the number of breeding house sparrows (Passer domesticus)	Everaert J, Bauwens D.	2007-06-01	Effect	Pulsed	Real		Mobile Phone Base Station	https://www.emf-portal.org/en/article/14674	UHF (300 MHz-3 GHz) studies	Not Stated	0	1
1376	Mobile phone-induced honeybee worker piping	Favre D.	2011-04-13	Effect	Pulsed	Real		Mobile Phone 2G GSM	https://www.emf-portal.org/en/article/19270	UHF (300 MHz-3 GHz) studies	Not Stated	0	1
1377	Melatonin modulates wireless (2.45 GHz)-induced oxidative injury through TRPM2 and voltage gated Ca(2+) channels in brain and dorsal root ganglion in rat	Nazıroğlu M, Çelik Ö, Özgül C, Çiğ B, Doğan S, Bal R, Gümral N, Rodríguez AB, Pariente JA.	2012-02-01	Effect	Pulsed		1	RF Signal Generator	https://www.ncbi.nlm.nih.gov/pubmed/22019785	UHF (300 MHz-3 GHz) studies	Partially supported by Unit of Scientiﬁc Research Project, Suleyman Demirel University	0	1
1378	2.45-Gz wireless devices induce oxidative stress and proliferation through cytosolic Ca²⁺ influx in human leukemia cancer cells	Nazıroğlu M, Ciğ B, Doğan S, Uğuz AC, Dilek S, Faouzi D.	2012-06-01	Effect	Pulsed		1	RF Signal Generator	https://www.ncbi.nlm.nih.gov/pubmed/22489926	UHF (300 MHz-3 GHz) studies	No Conflict of Interest Stated	1	0
1379	Modulator effects of L-carnitine and selenium on wireless devices (2.45 GHz)-induced oxidative stress and electroencephalography records in brain of rat.	Nazıroglu M, Gümral N.	2009-04-29	Effect	Pulsed		1	RF Signal Generator	https://www.ncbi.nlm.nih.gov/pubmed/19637079	UHF (300 MHz-3 GHz) studies	No Conflict of Interest Stated	0	1
1380	Expression of the immediate early gene, c-fos, in mouse brain after acute global system for mobile communication microwave exposure	Finnie, J. W.	2005-06-01	No Effect	Pulsed	Real		Mobile Phone 2G GSM	https://www.ncbi.nlm.nih.gov/pubmed/16175897	UHF (300 MHz-3 GHz) studies	Not Stated	0	1
1381	Protective effects of melatonin against oxidative injury in rat testis induced by wireless (2.45 GHz) devices.	Oksay T, Naziroğlu M, Doğan S, Güzel A, Gümral N, Koşar PA.	2012-04-12	Effect	Pulsed		1	RF Signal Generator	https://www.ncbi.nlm.nih.gov/pubmed/23145464	UHF (300 MHz-3 GHz) studies	Not Stated	0	1
1382	Expression of the water channel protein, aquaporin-4, in mouse brains exposed to mobile telephone radiofrequency fields	Finnie JW, Blumbergs PC, Cai Z, Manavis J.	2009-08-01	No Effect	Pulsed	Simulated		Mobile Phone GSM Simulated	https://www.emf-portal.org/en/article/17038	UHF (300 MHz-3 GHz) studies	Not Stated	0	1
1383	Neonatal mouse brain exposure to mobile telephony and effect on blood-brain barrier permeability	Finnie JW, Blumbergs PC, Cai Z, Manavis J, Kuchel TR.	2006-06-01	No Effect	Pulsed	Real		Mobile Phone 2G GSM	https://www.emf-portal.org/en/article/13987	UHF (300 MHz-3 GHz) studies	Funding by the National Health and Medical Research Council	0	1
1384	Effect of mobile telephony on blood-brain barrier permeability in the fetal mouse brain	Finnie JW, Blumbergs PC, Cai Z, Manavis J, Kuchel TR.	2006-02-01	No Effect	Pulsed	Real		Mobile Phone 2G GSM	https://www.emf-portal.org/en/article/13429	UHF (300 MHz-3 GHz) studies	National Health and Medical Research Council (NHMRC), Australia	0	1
1386	Oxidative damage in the kidney induced by 900-MHz-emitted mobile phone: protection by melatonin	Oktem F, Ozguner F, Mollaoglu H, Koyu A, Uz E.	2005-03-11	Effect	Continuous		1	Simulated by a signal generator	https://www.ncbi.nlm.nih.gov/pubmed/15950073	UHF (300 MHz-3 GHz) studies	Not Stated	0	1
1387	Effect of global system for mobile communication (gsm)-like radiofrequency fields on vascular permeability in mouse brain	Finnie JW, Blumbergs PC, Manavis J, Utteridge TD, Gebski V, Swift JG, Vernon-Roberts B, Kuchel TR.	2001-08-01	No Effect	Pulsed	Real		Mobile Phone 2G GSM	https://www.emf-portal.org/en/article/7467	UHF (300 MHz-3 GHz) studies	Not Stated	0	1
1388	Expression of the immediate early gene, c-fos, in fetal brain after whole of gestation exposure of pregnant mice to global system for mobile communication microwaves	Finnie JW, Cai Z, Blumbergs PC, Manavis J, Kuchel TR.	2006-08-01	No Effect	Pulsed	Real		Mobile Phone 2G GSM	https://www.ncbi.nlm.nih.gov/pubmed/16916723	UHF (300 MHz-3 GHz) studies	National Health and Medical Research Council (NHMRC)	0	1
1389	Microglial activation as a measure of stress in mouse brains exposed acutely (60 minutes) and long-term (2 years) to mobile telephone radiofrequency fields	Finnie JW, Cai Z, Manavis J, Helps S, Blumbergs PC.	2010-02-01	No Effect	Pulsed	Real		Mobile Phone 2G GSM	https://www.emf-portal.org/en/article/17890	UHF (300 MHz-3 GHz) studies	National Health and Medical Research Council (NHMRC), Australia & Australian Centre for Radiofrequency Bioeffects	0	1
1390	Heat shock protein induction in fetal mouse brain as a measure of stress after whole of gestation exposure to mobile telephony radiofrequency fields	Finnie JW, Chidlow G, Blumbergs PC, Manavis J, Cai Z.	2009-04-01	No Effect	Pulsed	Real		Mobile Phone 2G GSM	https://www.ncbi.nlm.nih.gov/pubmed/19291540	UHF (300 MHz-3 GHz) studies	National Health and Medical Research Council (NHMRC), Australia and Australian Centre for Radiofrequency Bioeffects	0	1
1391	Effect of whole-body 1800MHz GSM-like microwave exposure on testicular steroidogenesis and histology in mice	Forgacs Z, Somosy Z, Kubinyi G, Bakos J, Hudák A, Surján A, Thuróczy G.	2006-01-24	Effect	Pulsed	Simulated		Mobile Phone GSM Simulated	https://www.ncbi.nlm.nih.gov/pubmed/16434166	UHF (300 MHz-3 GHz) studies	National Scientific Research Fund, the Committee for Health Studies of the Ministry of Health Hungary.	0	1
1392	Endometrial apoptosis induced by a 900-MHz mobile phone: preventive effects of vitamins E and C	Oral B, Guney M, Ozguner F, Karahan N, Mungan T, Comlekci S, Cesur G.	2006-11-01	Effect	Pulsed		1	Simulated by a signal generator	https://www.ncbi.nlm.nih.gov/pubmed/17276964	UHF (300 MHz-3 GHz) studies	Not Stated	0	1
1394	Mobile phone-induced myocardial oxidative stress: protection by a novel antioxidant agent caffeic acid phenethyl ester.	Ozguner F, Altinbas A, Ozaydin M, Dogan A, Vural H, Kisioglu AN, Cesur G, Yildirim NG.	2005-10-01	Effect	Pulsed		1	Simulated by a signal generator	https://www.ncbi.nlm.nih.gov/pubmed/16342473	UHF (300 MHz-3 GHz) studies	Not Stated	0	1
1395	Cranial and postcranial skeletal variations induced in mouse embryos by mobile phone radiation	Fragopoulou AF, Koussoulakos SL, Margaritis LH.	2010-06-01	Uncertain Effect	Pulsed	Real		Mobile Phone 2G GSM	https://www.emf-portal.org/en/article/17645	UHF (300 MHz-3 GHz) studies	University of Athens, Greece	0	1
1396	Whole body exposure with GSM 900MHz affects spatial memory in mice	Fragopoulou AF, Miltiadous P, Stamatakis A, Stylianopoulou F, Koussoulakos SL, Margaritis LH.	2010-06-01	Effect	Pulsed	Real		Mobile Phone 2G GSM	https://www.emf-portal.org/en/article/17772	UHF (300 MHz-3 GHz) studies	Special Account of Research Grants from the National and Kapodistrian University of Athens.	0	1
1397	Brain proteome response following whole body exposure of mice to mobile phone or wireless DECT base radiation	Fragopoulou AF1, Samara A, Antonelou MH, Xanthopoulou A, Papadopoulou A, Vougas K, Koutsogiannopoulou E, Anastasiadou E, Stravopodis DJ, Tsangaris GT, Margaritis LH.	2012-12-01	Effect	Pulsed	Real		Mobile Phone 2G GSM	https://www.emf-portal.org/en/article/20130	UHF (300 MHz-3 GHz) studies	University of Athens, Greece	0	1
1400	Effects of 900 MHz electromagnetic fields exposure on cochlear cells' functionality in rats: evaluation of distortion product otoacoustic emissions	Galloni P, Lovisolo GA, Mancini S, Parazzini M, Pinto R, Piscitelli M, Ravazzani P, Marino C.	2005-10-01	No Effect	Continuous	Real		Mobile Phone 2G GSM	https://www.emf-portal.org/en/article/12285	UHF (300 MHz-3 GHz) studies	(EU)/European Commission, Ministry of University and Research), Italy &Italian Consortium ELETTRA 2000	0	1
1401	Protective effects of melatonin and caffeic acid phenethyl ester against retinal oxidative stress in long-term use of mobile phone: a comparative study	Ozguner F, Bardak Y, Comlekci S.	2006-01-01	Effect	Pulsed		1	Simulated by a signal generator	https://www.ncbi.nlm.nih.gov/pubmed/16317515	UHF (300 MHz-3 GHz) studies	Not Stated	0	1
1402	Electromagnetic fields from mobile phones do not affect the inner auditory system of Sprague-Dawley rats	Galloni P, Parazzini M, Piscitelli M, Pinto R, Lovisolo GA, Tognola G, Marino C, Ravazzani P.	2005-12-01	No Effect	Pulsed	Simulated		Mobile Phone GSM Simulated	https://www.emf-portal.org/en/article/12902	UHF (300 MHz-3 GHz) studies	(EU)/European Commission, Ministry of University and Research), Italy &Italian Consortium ELETTRA 2000	0	1
1404	A novel antioxidant agent caffeic acid phenethyl ester prevents long-term mobile phone exposure-induced renal impairment in rat. Prognostic value of malondialdehyde, N-acetyl-beta-D-glucosaminidase and nitric oxide determination	Ozguner F, Oktem F, Ayata A, Koyu A, Yilmaz HR.	2005-09-01	Effect	Pulsed		1	Simulated by a signal generator	https://www.ncbi.nlm.nih.gov/pubmed/16132717	UHF (300 MHz-3 GHz) studies	Not Stated	0	1
1405	Mobile phone radiation-induced free radical damage in the liver is inhibited by the antioxidants N-acetyl cysteine and epigallocatechin-gallate	Ozgur E, Güler G, Seyhan N.	2010-09-01	Effect	Pulsed		1	Simulated by a signal generator	https://www.ncbi.nlm.nih.gov/pubmed/20807176	UHF (300 MHz-3 GHz) studies	Gazi University Research funds	0	1
1414	Effect of amplitude modulated RF radiation on calcium ion efflux and ODC activity in chronically exposed rat brain	Paulraj R, Behari J, Rao AR.	1999-10-01	Effect	Amplitude Modulation			Transverse Electromagnetic (TEM) Cell	https://www.ncbi.nlm.nih.gov/pubmed/10844985	UHF (300 MHz-3 GHz) studies	Not Stated	0	1
1420	Effects of in vivo exposure to GSM-modulated 900 MHz radiation on mouse peripheral lymphocytes	Gatta L, Pinto R, Ubaldi V, Pace L, Galloni P, Lovisolo GA, Marino C, Pioli C.	2003-11-01	Uncertain Effect	Pulsed	Real		Mobile Phone 2G GSM	https://www.emf-portal.org/en/article/10429	UHF (300 MHz-3 GHz) studies	Ministry of University and Research , Italy	0	1
1421	Lymphomas in E mu-Pim1 transgenic mice exposed to pulsed 900 MHz electromagnetic fields.	Repacholi MH, Basten A, Gebski V, Noonan D, Finnie J, Harris AW.	1997-05-01	Effect	Pulsed	Simulated		Mobile Phone GSM Simulated	https://www.ncbi.nlm.nih.gov/pubmed/9146709	UHF (300 MHz-3 GHz) studies	Telstra Corporation Limited and by the National Health and Medical Research Council	0	1
1424	Effects of 1-week and 6-week exposure to GSM/DCS radiofrequency radiation on micronucleus formation in B6C3F1 mice	Gorlitz BD, Müller M, Ebert S, Hecker H, Kuster N, Dasenbrock C.	2005-10-01	No Effect	Pulsed	Simulated		Mobile Phone GSM Simulated	https://www.ncbi.nlm.nih.gov/pubmed/16187745	UHF (300 MHz-3 GHz) studies	Cellular Telecommunications & Internet Association, 1250 Connecticut Avenue, Washington, DC	0	1
1426	Autoimmune processes after long-term low-level exposure to electromagnetic fields (the results of an experiment). Part 4. Manifestation of oxidative intracellular stress-reaction after long-term non-thermal EMF exposure of rats	Grigoriev YG, Mikhaĭlov VF, Ivanov AA, Mal'tsev VN, Ulanova AM, Stavrakova NM, Nikolaeva IA, Grigoriev OA.	2010-01-01	Effect	Continuous		1	RF Signal Generator	https://www.ncbi.nlm.nih.gov/pubmed/20297677	UHF (300 MHz-3 GHz) studies	WHO sponsored	0	1
1427	Confirmation studies of Soviet research on immunological effects of microwaves: Russian immunology results	Grigoriev YG, Grigoriev OA, Ivanov AA, Lyaginskaya AM, Merkulov AV, Shagina NB, Maltsev VN, Leveque P, Ulanova AM, Osipov VA, Shafirkin AV.	2010-12-01	Effect	Continuous			RF Signal Generator	https://www.emf-portal.org/en/article/18632	UHF (300 MHz-3 GHz) studies	GSM Association, UK/Ireland , Mobile Manufacturers Forum (MMF), Belgium Center for Electromagnetic Safety, Moscow, Russia	0	1
1428	2.45 GHz microwave irradiation-induced oxidative stress affects implantation or pregnancy in mice, Mus musculus	Shahin S, Singh VP, Shukla RK, Dhawan A, Gangwar RK, Singh SP, Chaturvedi CM.	2013-01-22	Effect	Continuous		1	RF Signal Generator	https://www.ncbi.nlm.nih.gov/pubmed/23334843	UHF (300 MHz-3 GHz) studies	Indian Council of Medical Research	0	1
1429	The effects of microwave emitted by cellular phones on ovarian follicles in rats	Gul A, Celebi H, Ugras S.	2009-02-25	Effect	Pulsed			Mobile Phone GSM	https://www.emf-portal.org/en/article/16824	UHF (300 MHz-3 GHz) studies	No Conflict of Interest Stated	0	1
1430	Apoptosis resulted from radiofrequency radiation exposure of pregnant rabbits and their infants	Guler G, Ozgur E, Keles H, Tomruk A, Vural SA, Seyhan N.	2011-10-01	Effect	Pulsed	Simulated		Mobile Phone GSM Simulated	https://www.researchgate.net/publication/233799824_Apoptosis_resulted_from_radiofrequency_radiation_exposure_of_pregnant_rabbits_and_their_infants	UHF (300 MHz-3 GHz) studies	Not Stated	0	1
1431	Effects of Selenium and L-Carnitine on Oxidative Stress in Blood of Rat Induced by 2.45-GHz Radiation from Wireless Devices	Gumral N, Naziroglu M, Koyu A, Ongel K, Celik O, Saygin M, Kahriman M, Caliskan S, Kayan M, Gencel O, Flores-Arce MF.	2009-04-25	Effect	Pulsed		1	RF Signal Generator	https://www.ncbi.nlm.nih.gov/pubmed/19396408	UHF (300 MHz-3 GHz) studies	Not Stated	0	1
1432	Mobile phone radiation inhibits Vigna radiata (mung bean) root growth by inducing oxidative stress	Sharma VP, Singh HP, Kohli RK, Batish DR.	2009-08-13	Effect	Pulsed	Real	1	Mobile Phone GSM	https://www.ncbi.nlm.nih.gov/pubmed/19682728	UHF (300 MHz-3 GHz) studies	Not Stated	0	1
1434	Is there any possible genotoxic effect in exfoliated bladder cells of rat under the exposure of 1800 MHz GSM-like modulated radio frequency radiation (RFR)?	Gurbuz N, Sirav B, Yuvaci HU, Turhan N, Coskun ZK, Seyhan N.	2010-08-01	No Effect	Pulsed	Simulated		Mobile Phone GSM Simulated	https://www.ncbi.nlm.nih.gov/pubmed/20707643	UHF (300 MHz-3 GHz) studies	Fatih University Research Foundation and Grant from Gazi University Research Foundation	0	1
1435	Effects of long-term electromagnetic field exposure on spatial learning and memory in rats	Hao D, Yang L, Chen S, Tong J, Tian Y, Su B, Wu S, Zeng Y.	2012-02-24	Effect	Continuous	Simulated		Mobile Phone GSM Simulated	https://www.emf-portal.org/en/article/20319	UHF (300 MHz-3 GHz) studies	National Basic Research Program of China and National Natural Science Foundation (NSFC), China	0	1
1437	Cell phone electromagnetic field radiations affect rhizogenesis through impairment of biochemical processes	Singh HP, Sharma VP, Batish DR, Kohli RK.	2011-05-12	Effect	Pulsed	Real	1	Mobile Phone 3G GSM	https://www.ncbi.nlm.nih.gov/pubmed/21562792	UHF (300 MHz-3 GHz) studies	Not Stated	0	1
1439	Prevalence of nuclear cataract in Swiss veal calves and its possible association with mobile telephone antenna base stations	Hassig M, Jud F, Naegeli H, Kupper J, Spiess BM.	2009-10-01	Effect	Pulsed	Real	1	Mobile Phone Base Station	https://www.emf-portal.org/en/article/17570	UHF (300 MHz-3 GHz) studies	Not Stated	0	1
1440	Increased occurence of nuclear cataract in the calf after erection of a mobile phone base station	Hassig M, Jud F, Spiess B.	2012-01-24	Effect	Pulsed	Real		Mobile Phone Base Station	https://www.researchgate.net/publication/221788770_Increased_occurence_of_nuclear_cataract_in_the_calf_after_erection_of_a_mobile_phone_base_station	UHF (300 MHz-3 GHz) studies	Federal Office for Communications and (OFCOM) and the Federal Office for the Environment (FOEN) provided support	0	1
1441	Short term exposure to 1439 MHz pulsed TDMA field does not alter melatonin synthesis in rats	Hata K, Yamaguchi H, Tsurita G, Watanabe S, Wake K, Taki M, Ueno S, Nagawa H.	2005-01-01	Uncertain Effect	Pulsed			TDMA low level microwave	https://www.ncbi.nlm.nih.gov/pubmed/15605405	UHF (300 MHz-3 GHz) studies	Ministry of Internal Affairs and Communications, Japan.	0	1
1442	No effects of radiofrequency radiation on 3-chloro-4-(dichloromethyl)-5-hydroxy-2(5H)-furanone-induced tumorigenesis in female Wistar rats	Heikkinen P, Ernst H, Huuskonen H, Komulainen H, Kumlin T, Maki-Paakkanen J, Puranen L, Juutilainen J.	2006-08-01	Uncertain Effect	Pulsed	Simulated		Mobile Phone GSM Simulated	https://www.emf-portal.org/en/article/14055	UHF (300 MHz-3 GHz) studies	European Union (EU)/European Comm & Nokia	0	1
1443	Effects of mobile phone radiation on UV-induced skin tumourigenesis in ornithine decarboxylase transgenic and non-transgenic mice	Heikkinen P, Kosma VM, Alhonen L, Huuskonen H, Komulainen H, Kumlin T, Laitinen JT, Lang S, Puranen L, Juutilainen J.	2003-04-01	Uncertain Effect	Pulsed	Real		Mobile Phone (DAMPS) Digital Advanced Mobile Phone System	https://www.emf-portal.org/en/article/9979	UHF (300 MHz-3 GHz) studies	Nokia, Elisa Communications Corporation, Finland , Benefon, Finland	0	1
1444	Effects of mobile phone radiation on X-ray-induced tumorigenesis in mice	Heikkinen P, Kosma VM, Hongisto T, Huuskonen H, Hyysalo P, Komulainen H, Kumlin T, Lahtinen T, Lang S, Puranen L, Juutilainen J.	2001-12-01	No Effect	Pulsed	Simulated		Mobile Phone GSM Simulated	https://www.ncbi.nlm.nih.gov/pubmed/11741502	UHF (300 MHz-3 GHz) studies	The Finnish Work Environment Fund, Elisa Communications Corporation, Nokia Mo- bile Phones, and Sonera Corporation.	0	1
1445	Direct observation of microcirculatory parameters in rat brain after local exposure to radio-frequency electromagnetic field	Hirota, S, Matsuura M, Masuda H, Ushiyama A, Wake K, Watanabe S,	2008-11-25	No Effect	Pulsed	Simulated		Mobile Phone GSM Simulated	http://link.springer.com/article/10.1007/s10669-008-9199-8	UHF (300 MHz-3 GHz) studies	Ministry of internal affairs and communications, Japan.	0	1
1446	Melatonin reduces oxidative stress induced by chronic exposure of microwave radiation from mobile phones in rat brain.	Sokolovic D, Djindjic B, Nikolic J, Bjelakovic G, Pavlovic D, Kocic G, Krstic D, Cvetkovic T, Pavlovic V.	2008-09-29	Effect	Pulsed	Real	1	Mobile Phone GSM	https://www.ncbi.nlm.nih.gov/pubmed/18827438	UHF (300 MHz-3 GHz) studies	Not Stated	0	1
1447	Study on potential effects of "902-MHz GSM-type Wireless Communication Signals" on DMBA-induced mammary tumours in Sprague-Dawley rats	Hruby R, Neubauer G, Kuster N, Frauscher M.	2008-01-01	Uncertain Effect	Pulsed	Simulated		Mobile Phone GSM Simulated	https://www.emf-portal.org/en/article/15331	UHF (300 MHz-3 GHz) studies	European Union (EU)/European Commission, GSM Association, UK/Ireland, Mobile Manufacturers Forum (MMF), Belgium, Austrian Government	0	1
1448	Effect of radiofrequency radiation exposure on mouse skin tumorigenesis initiated by 7,12-dimethybenz[alpha]anthracene	Huang TQ, Lee JS, Kim TH, Pack JK, Jang JJ, Seo JS	2005-12-09	No Effect	Pulsed	Real		Mobile Phone CDMA	https://www.emf-portal.org/en/article/13546	UHF (300 MHz-3 GHz) studies	Ministry of Information and Communication, Korea	0	1
1451	Accelerated development of spontaneous and benzopyrene-induced skin cancer in mice exposed to 2450-MHz microwave radiation	Szmigielski S, Szudzinski A, Pietraszek A, Bielec M, Janiak M, Wrembel JK.	1981-07-20	Effect	Not Stated			RF Signal Generator	https://www.ncbi.nlm.nih.gov/pubmed/7126270	UHF (300 MHz-3 GHz) studies	Bureau of Radiological Health, FDA	0	1
1452	Effects on rat testis of 1.95-GHz W-CDMA for IMT-2000 cellular phones	Imai N, Kawabe M, Hikage T, Nojima T, Takahashi S, Shirai T.	2011-08-01	Effect	Pulsed	Simulated		Mobile Phone CDMA Simulated	https://www.emf-portal.org/en/article/18880	UHF (300 MHz-3 GHz) studies	Association of Radio Industries and Businesses (ARIB), Japan	0	1
1454	Genotoxicity of radiofrequency signals. I. Investigation of DNA damage and micronuclei induction in cultured human blood cells	Tice RR, Hook GG, Donner M, McRee DI, Guy AW.	2002-02-01	Effect	Frequency Modulated			Simulated by a signal generator and TEM Cell	https://www.ncbi.nlm.nih.gov/pubmed/11835258	UHF (300 MHz-3 GHz) studies	Motorola Corporation Provided Phones. Contract grant sponsor: Wireless Technology Research LLC	1	0
1455	Lack of promotion of 7,12-dimethylbenz[a]anthracene-initiated mouse skin carcinogenesis by 1.5 GHz electromagnetic near fields	Imaida K, Kuzutani K, Wang J, Fujiwara O, Ogiso T, Kato K, Shirai T.	2001-11-01	No Effect	Pulsed			TDMA low level microwave	https://www.emf-portal.org/en/article/8091	UHF (300 MHz-3 GHz) studies	Association of Radio Industries and Businesses (ARIB), Japan	0	1
1456	Effects of mobile phone use on brain tissue from the rat and a possible protective role of vitamin C - a preliminary study	Imge EB, Kiliçoğlu B, Devrim E, Cetin R, Durak I.	2010-12-01	Effect	Pulsed	Simulated		Mobile Phone GSM Simulated	https://www.ncbi.nlm.nih.gov/pubmed/20698742	UHF (300 MHz-3 GHz) studies	Not Stated	0	1
1457	Effects of electromagnetic radiation from a cellular telephone on the oxidant and antioxidant levels in rabbits	Irmak MK, Fadillioğlu E, Güleç M, Erdoğan H, Yağmurca M, Akyol O.	2002-04-23	Effect	Pulsed	Simulated	1	Mobile Phone GSM Simulated	https://www.ncbi.nlm.nih.gov/pubmed/12415560	UHF (300 MHz-3 GHz) studies	Not Stated	0	1
1458	Effects of electromagnetic radiation from a cellular telephone on epidermal Merkel cells	Irmak MK, Oztas E, Yagmurca M, Fadillioglu E, Bakir B.	2003-02-01	Effect	Pulsed	Simulated		Mobile Phone GSM Simulated	https://www.emf-portal.org/en/article/10440	UHF (300 MHz-3 GHz) studies	Not Stated	0	1
1459	Exposure to radiofrequency radiation induces oxidative stress in duckweed Lemna minor L	Tkalec M, Malarić K, Pevalek-Kozlina B.	2007-12-01	Effect	Not Stated		1	Transverse Electromagnetic (TEM) Cell	https://www.ncbi.nlm.nih.gov/pubmed/17825879	UHF (300 MHz-3 GHz) studies	Ministry of Science, Education and Sports, Republic of Croatia	0	1
1460	Autoimmune processes after long-term low-level exposure to electromagnetic fields (the results of an experiment). Part 3. The effect of the long-term non-thermal RF EMF exposure on complement-fixation antibodies against homologenous tissue	Ivanov AA, Grigor'ev IuG, Mal'tsev VN, Ulanova AM, Stavrakova NM, Skachkova VG, Grigor'ev OA.	2011-03-29	Effect	Continuous			RF Signal Generator	https://www.ncbi.nlm.nih.gov/pubmed/20297676	UHF (300 MHz-3 GHz) studies	Not Stated	0	1
1461	Effect of modified SHF and acoustic stimulation on spectral characteristics of the electroencephalograms of the cat brain	Ivanova VIu, Martynova OV, Aleĭnik SV, Limarenko AV.	2000-09-01	Effect	Pulsed	Simulated		Mobile Phone GSM Simulated	https://www.ncbi.nlm.nih.gov/pubmed/11094726	UHF (300 MHz-3 GHz) studies	Not Known	0	1
1462	Oxidative and genotoxic effects of 900 MHz electromagnetic fields in the earthworm Eisenia fetida	Tkalec M, Stambuk A, Srut M, Malarić K, Klobučar GI.	2013-04-01	Effect	Continuous		1	RF Signal Generator and a Gigahertz Transverse Electromagnetic (GTEM) Cell	https://www.ncbi.nlm.nih.gov/pubmed/23352129	UHF (300 MHz-3 GHz) studies	This work was supported by the Croatian Scientific Research Council (Project Nos. 119-0982934-3110, 036-0361566-1569)	0	1
1463	Does whole body exposure to GSM-950 MHz electromagnetic fields affect acquisition and consolidation of spatial information in rats?	Jadidi, M., Firoozabadi SM, Rashidy-Pour A, Bolouri B, Fathollahi Y, Sajadi AA.	2009-06-01	No Effect	Pulsed	Simulated		Mobile Phone GSM Simulated	http://en.journals.sid.ir/ViewPaper.aspx?ID=181088	UHF (300 MHz-3 GHz) studies	Iran Telecommunication Research Center, Tarbiat Modares University and Semnan University of Medical Sciences	0	1
1466	Effects of melatonin on Wi-Fi-induced oxidative stress in lens of rats	Tök L, Nazıroğlu M, Doğan S, Kahya MC, Tök O.	2014-01-01	Effect	Pulsed		1	RF Signal Generator	https://www.ncbi.nlm.nih.gov/pubmed/24492496	UHF (300 MHz-3 GHz) studies	Not Stated	0	1
1468	Adaptive Response in Mice Exposed to 900 MHz Radiofrequency Fields: Primary DNA Damage	Jiang B, Nie J, Zhou Z, Zhang J, Tong J, Cao Y.	2012-02-28	Effect	Continuous			RF Signal Generator and Gigahertz Transverse Electromagnetic (GTEM) Cell	https://www.ncbi.nlm.nih.gov/pubmed/22389679	UHF (300 MHz-3 GHz) studies	National Natural Science Foundation of China	0	1
1469	One-year, simultaneous combined exposure of CDMA and WCDMA radiofrequency electromagnetic fields to rats	Jin YB, Lee HJ, Seon Lee J, Pack JK, Kim N, Lee YS.	2011-04-01	Uncertain Effect	Pulsed	Real		Mobile Phone CDMA	https://www.emf-portal.org/en/article/18848	UHF (300 MHz-3 GHz) studies	Korea Communications Commission (KCC), Korea	0	1
1470	The Effects of Single and Repeated Exposure to 2.45 GHz Radiofrequency Fields on c-Fos Protein Expression in the Paraventricular Nucleus of Rat Hypothalamus	Jorge-Mora T, Misa-Agustino MJ, Rodriguez-Gonzalez JA, Jorge-Barreiro FJ, Ares-Pena FJ, Lopez-Martin E.	2011-08-05	Effect	Continuous			RF Signal Generator	https://www.emf-portal.org/en/article/19483	UHF (300 MHz-3 GHz) studies	Xunta de Galicia, Spain	0	1
1471	Long-term, low-level exposure of mice prone to mammary tumors to 435 MHz radiofrequency radiation	Toler JC, Shelton WW, Frei MR, Merritt JH, Stedham MA.	1997-09-01	No Effect	Pulsed			Simulated by a signal generator	https://www.ncbi.nlm.nih.gov/pubmed/9291353	UHF (300 MHz-3 GHz) studies	United States Air Force Contract F 33615-83-D-060	0	1
1472	GSM 900 MHz microwave radiation affects embryo development of Japanese quails	Tsybulin O, Sidorik E, Kyrylenko S, Henshel D, Yakymenko I.	2012-03-01	Effect	Pulsed	Real	1	Mobile Phone 2G GSM	https://www.ncbi.nlm.nih.gov/pubmed/22268787	UHF (300 MHz-3 GHz) studies	National Academy of Sciences of Ukraine, European Community within the Seventh Framework Programme	0	1
1473	Exposure to 2.45 GHz microwave radiation provokes cerebral changes in induction of HSP-90 a/ß.heat shock protein in rat	Jorge-Mora, T. Alvarez-Folgueiras M, Leiro J, Jorge-Barreiro FJ, Ares-Pena FJ, Lopez-Martin E	2010-01-01	Effect	Continuous			RF Signal Generator	https://www.emf-portal.org/en/article/19509	UHF (300 MHz-3 GHz) studies	Secretariat General for Research and Development of the Xunta de Galicia, Spain Ministerio de Educacion (Ministry of Education), Spain Xunta de Galicia, Spain	0	1
1474	Micronucleus frequency in erythrocytes of mice after long-term exposure to radiofrequency radiation	Juutilainen J, Heikkinen P, Soikkeli H, Maki-Paakkanen J.	2007-04-01	No Effect	Continuous	Real		Mobile Phone NHT (Analog)	https://www.emf-portal.org/en/article/14790	UHF (300 MHz-3 GHz) studies	Forschungsgemeinschaft Funk e.V. (FGF) (Research Association for Radio Applications), Germany Nokia, Elisa Communications Corporation, Finland , Benefon, Finland	0	1
1476	Auditory Brainstem Response Changes during Exposure to GSM-900 Radiation: An Experimental Study	Kaprana AE, Chimona TS, Papadakis CE, Velegrakis SG, Vardiambasis IO, Adamidis G, Velegrakis GA	2010-11-16	Effect	Pulsed	Simulated		Mobile Phone GSM Simulated	https://www.emf-portal.org/en/article/18764	UHF (300 MHz-3 GHz) studies	Not Stated	0	1
1477	Selenium and L-carnitine reduce oxidative stress in the heart of rat induced by 2.45-GHz radiation from wireless devices	Turker Y, Nazıroğlu M, Gümral N, Celik O, Saygın M, Cömlekçi S, Flores-Arce M.	2011-03-01	Effect	Pulsed		1	RF Signal Generator	https://www.ncbi.nlm.nih.gov/pubmed/21360060	UHF (300 MHz-3 GHz) studies	Not Stated	0	1
1480	Effect of chronic exposure to cellular telephone electromagnetic fields on hearing in rats	Kayabasoglu G, Sezen OS, Eraslan G, Aydin E, Coskuner T, Unver S.	2009-04-01	No Effect	Pulsed	Real		Mobile Phone 3G GSM	https://www.emf-portal.org/en/article/18747	UHF (300 MHz-3 GHz) studies	Not Stated	0	1
1484	Evidence for mobile phone radiation exposure effects on reproductive pattern of male rats: role of ROS	Kesari KK, Behari J.	2012-09-01	Effect	Pulsed	Simulated		Mobile Phone GSM Simulated	https://www.emf-portal.org/en/article/21125	UHF (300 MHz-3 GHz) studies	Indian Council of Medical Research (ICMR) for their financial support	0	1
1485	Effects of Radiofrequency Electromagnetic Wave Exposure from Cellular Phones on the Reproductive Pattern in Male Wistar Rats	Kesari KK, Kumar S, Behari J.	2011-01-15	Effect	Pulsed	Real	1	Mobile Phone GSM	https://www.emf-portal.org/en/article/18931	UHF (300 MHz-3 GHz) studies	Indian Council of Medical Research (ICMR), India	0	1
1486	Pathophysiology of Microwave Radiation: Effect on Rat Brain	Kesari KK, Kumar S, Behari J.	2011-11-29	Effect	Continuous			Microwave Oven	https://www.emf-portal.org/en/article/19939	UHF (300 MHz-3 GHz) studies	Indian Council of Medical Research (ICMR), India	0	1
1488	Detection of oxidative stress induced by mobile phone radiation in tissues of mice using 8-oxo-7, 8-dihydro-20-deoxyguanosine as a biomarker	Khalil AM, Alshamali AM, Gagaa MH.	2011-05-01	No Effect	Pulsed	Simulated		Mobile Phone GSM Simulated	https://www.emf-portal.org/en/article/20110	UHF (300 MHz-3 GHz) studies	Yarmouk University, Irbid, Jordan	0	1
1489	Histological and Ultrastructural Analyses of Male Mice Exposed to Mobile Phone Radiation	Khalil, AM, Al-Adhammi M, Al-shara B, Gagaa M, Rawshdeh AA, Alshamli A.	2012-01-01	Effect	Pulsed	Simulated		Mobile Phone GSM Simulated	https://www.researchgate.net/publication/258885369_Histological_and_Ultrastructural_Analyses_of_male_Mice_Exposed_to_Mobile_Phone_radiation	UHF (300 MHz-3 GHz) studies	Deanship of the Graduate Studies at Yarmouk University	0	1
1490	Individual responsiveness to induction of micronuclei in human lymphocytes after exposure in vitro to 1800-MHz microwave radiation	Zotti-Martelli L, Peccatori M, Maggini V, Ballardin M, Barale R.	2005-04-04	Effect	Continuous			Simulated by a RF signal generator	https://www.ncbi.nlm.nih.gov/pubmed/15781209	UHF (300 MHz-3 GHz) studies	This work has been supported by CISAM (Ministry of Defence).	1	0
1492	Comparison of antioxidant capacity changes in rabbit blood after disconnected exposure to mobile phone microwave	Khavanin A, Zaroushani V, Mortazavi SB, Rezaei A, Mirzaei R	2008-04-01	Effect	Not Stated		1	RF Signal Generator	http://en.journals.sid.ir/ViewPaper.aspx?ID=139457	UHF (300 MHz-3 GHz) studies	Not Known	0	1
1493	Effects of Green Tea on Mineral Levels of Liver and Testis of Guinea Pigs Electromagnetic Field Emitted by Mobil Phones	Kilicalp, D, Dede S, Deger Y, Aslan L.	2009-04-01	Effect	Pulsed	Real		Mobile Phone GSM	http://scialert.net/fulltext/?doi=ajava.2009.86.92	UHF (300 MHz-3 GHz) studies	Not Stated	0	1
1494	Green tea catechins protect rats from microwave-induced oxidative damage to heart tissue	Kim MJ, Rhee SJ.	2004-09-01	Effect	Continuous		1	Microwave Oven	https://www.emf-portal.org/en/article/18443	UHF (300 MHz-3 GHz) studies	Not Stated	0	1
1496	Local exposure of 849 MHz and 1763 MHz radiofrequency radiation to mouse heads does not induce cell death or cell proliferation in brain	Kim TH, Huang TQ, Jang JJ, Kim MH, Kim HJ, Lee JS, Pack JK, Seo JS, Park WY.	2008-06-30	No Effect	Pulsed	Simulated		Mobile Phone CDMA Simulated	https://www.emf-portal.org/en/article/16105	UHF (300 MHz-3 GHz) studies	Ministry of Information and Communication & Education and Human Resources Development, Korea	0	1
1498	Effects of chronic exposure of electromagnetic fields from mobile phones on hearing in rats	Kizilay A, Ozturan O, Erdem T, Kalcioglu MT, Miman MC.	2003-08-01	No Effect	Pulsed	Real		Mobile Phone GSM	https://www.ncbi.nlm.nih.gov/pubmed/12927285	UHF (300 MHz-3 GHz) studies	Not stated	0	1
1501	Influence of anesthesia on ocular effects and temperature in rabbit eyes exposed to microwaves	Kojima M, Hata I, Wake K, Watanabe S, Yamanaka Y, Kamimura Y, Taki M, Sasaki K.	2004-04-01	Effect	Not Stated			Open Aperture Waveguide AGriffithntenna	https://www.ncbi.nlm.nih.gov/pubmed/15042632	UHF (300 MHz-3 GHz) studies	Committee to Promote Research on the Potential Biological Effects of Electromagnetic Fields, Ministry of Internal Affairs and Communications, Japan.	0	1
1503	Caffeic Acid Phenethyl Ester Modulates 1800 MHz Microwave-Induced Oxidative Stress in Rat Liver	Koyu A, Naziroglu M, Özgüner F.	2009-07-07	Effect	Pulsed	Simulated	1	Mobile Phone GSM Simulated	https://www.emf-portal.org/en/article/13470	UHF (300 MHz-3 GHz) studies	Not Stated	0	1
1504	Effects of 900 MHz electromagnetic field on TSH and thyroid hormones in rats	Koyu A, Cesur G, Özgüner F, Akdogan M, Mollaoglu H, Ozen S.	2005-04-11	Effect	Continuous			RF Signal Generator	https://www.emf-portal.org/en/article/11995	UHF (300 MHz-3 GHz) studies	Not Stated	0	1
1508	Exposure to cell phone radiations produces biochemical changes in worker honey bees	Kumar NR, Sangwan S, Badotra P.	2011-01-01	Effect	Pulsed	Real		Mobile Phone	https://www.emf-portal.org/en/article/19126	UHF (300 MHz-3 GHz) studies	Department of Zoology, Punjab University, Chandigarh	0	1
1509	Adaptive response in mouse bone-marrow stromal cells exposed to 900-MHz radiofrequency fields: Gamma-radiation-induced DNA strand breaks and repair	Ji Y, He Q, Sun Y, Tong J, Cao Y.	2016-06-07	Effect	Continuous			RF Signal Generator and a Gigahertz Transverse Electromagnetic (GTEM) Cell	https://www.ncbi.nlm.nih.gov/pubmed/27267824	UHF (300 MHz-3 GHz) studies	National Natural Science Foundation of China	1	0
1510	Hypoactivity of Wistar rats exposed to mobile phone on elevated plus maze	Kumar RS, Sareesh NN, Nayak S, Mailankot M.	2009-06-10	Effect	Pulsed	Real		Mobile Phone GSM	https://www.emf-portal.org/en/article/18061	UHF (300 MHz-3 GHz) studies	Not Stated	0	1
1514	The therapeutic effect of a pulsed electromagnetic field on the reproductive patterns of male Wistar rats exposed to a 2.45-GHz microwave field	Kumar S, Kesari KK, Behari J.	2011-07-01	Effect	Amplitude Modulation			Microwave Oven	https://www.ncbi.nlm.nih.gov/pubmed/21876981	UHF (300 MHz-3 GHz) studies	Indian Council of Medical Research (ICMR)	0	1
1515	Mobile phone radiation and the developing brain: behavioral and morphological effects in juvenile rats	Kumlin T, Iivonen H, Miettinen P, Juvonen A, van Groen T, Puranen L, Pitkäaho R, Juutilainen J, Tanila H.	2007-10-01	Effect	Pulsed	Simulated		Mobile Phone GSM Simulated	https://www.emf-portal.org/en/article/15114	UHF (300 MHz-3 GHz) studies	Finnish Research Programme HERMO (Health Risk Assessment of Mobile Communications), Finland, VTT Technical Research Centre of Finland. HERMO was funded by Government, Industry and Institutions	0	1
1516	Lack of effects of 1439 MHz electromagnetic near field exposure on the blood-brain barrier in immature and young rats	Kuribayashi M, Wang J, Fujiwara O, Doi Y, Nabae K, Tamano S, Ogiso T, Asamoto M, Shirai T.	2005-09-02	No Effect	Pulsed			TDMA low level microwave	https://www.emf-portal.org/en/article/12426	UHF (300 MHz-3 GHz) studies	Association of Radio Industries and Businesses (ARIB), Japan	0	1
1519	The effect of chronic exposure to 835.62 MHz FDMA or 847.74 MHz CDMA radiofrequency radiation on the incidence of spontaneous tumors in rats	LaRegina MC, Moros EG, Pickard WF, Straube WL, Baty J, Roti Roti JL.	2003-08-01	No Effect	Pulsed	Simulated		Mobile Phone FDMA Simulated	https://www.emf-portal.org/en/article/10037	UHF (300 MHz-3 GHz) studies	Motorola	0	1
1520	Measurement of DNA damage after acute exposure to pulsed-wave 2450 MHz microwaves in rat brain cells by two alkaline comet assay methods	Lagroye I, Anane R, Wettring BA, Moros EG, Straube WL, LaRegina MC, Niehoff M, Pickard WF, Baty J, Roti Roti JL.	2004-01-01	No Effect	Pulsed			RF Signal Generator	https://www.emf-portal.org/en/article/11161	UHF (300 MHz-3 GHz) studies	Motorola, Inc., France Telecom R&D, the National Centre for Scientific CNRS) and the Research Council of Aquitaine. Roti-Roti is an ICNIRP Scientific Expert Group Member	0	1
1523	Prenatal exposure to radiofrequencies: Effects of WiFi signals on thymocyte development and peripheral T cell compartment in an animal model.	Laudisi F, Sambucci M, Nasta F, Pinto R, Lodato R, Altavista P, Lovisolo GA, Marino C, Pioli C.	2012-05-03	Uncertain Effect	Pulsed	Simulated		WiFi simulated	https://www.emf-portal.org/en/article/20696	UHF (300 MHz-3 GHz) studies	École Pratique des Hautes Etudes, France	0	1
1524	The effects of simultaneous combined exposure to CDMA and WCDMA electromagnetic fields on rat testicular function	Lee HJ, Jin YB, Kim TH, Pack JK, Kim N, Choi HD, Lee JS, Lee YS.	2011-10-19	No Effect	Pulsed	Simulated		Mobile Phone CDMA and WCDMA Simulated	https://www.emf-portal.org/en/article/19804	UHF (300 MHz-3 GHz) studies	Korea Communications Commission (KCC), Korea (Government Communications Authority)	0	1
1525	Lymphoma development of simultaneously combined exposure to two radiofrequency signals in AKR/J mice	Lee HJ, Jin YB, Lee JS, Choi SY, Kim TH, Pack JK, Choi HD, Kim N, Lee YS.	2011-03-23	Uncertain Effect	Pulsed	Real		Mobile Phone CDMA	https://www.emf-portal.org/en/article/19128	UHF (300 MHz-3 GHz) studies	Korea Communications Commission (KCC), Korea	0	1
1527	Lack of teratogenicity after combined exposure of pregnant mice to CDMA and WCDMA radiofrequency electromagnetic fields	Lee HJ, Lee JS, Pack JK, Choi HD, Kim N, Kim SH, Lee YS.	2009-11-01	No Effect	Pulsed	Real		Mobile Phone CDMA	https://www.emf-portal.org/de/article/17482	UHF (300 MHz-3 GHz) studies	The Korea Communications Commission (KCC), Korea	0	1
1529	The lack of histological changes of CDMA cellular phone-based radio frequency on rat testis	Lee HJ, Pack JK, Kim TH, Kim N, Choi SY, Lee JS, Kim SH, Lee YS.	2010-07-06	No Effect	Pulsed	Simulated		Mobile Phone CDMA Simulated	https://www.emf-portal.org/en/article/18427	UHF (300 MHz-3 GHz) studies	Korea Communications Commission (KCC), Korea Korea (Government Communications Authority)	0	1
1530	Subchronic exposure of hsp70.1-deficient mice to radiofrequency radiation	Lee JS, Huang TQ, Lee JJ, Pack JK, Jang JJ, Seo JS.	2005-10-01	No Effect	Pulsed	Real		Mobile Phone CDMA	https://www.emf-portal.org/en/article/13218	UHF (300 MHz-3 GHz) studies	Ministry of Information and Communication, Korea	0	1
1532	Effects of mobile phone electromagnetic fields at nonthermal SAR values on melatonin and body weight of Djungarian hamsters (Phodopus sungorus)	Lerchl A, Kruger H, Niehaus M, Streckert JR, Bitz AK, Hansen V.	2007-10-25	Effect	Pulsed	Simulated		TETRA simulated	https://www.emf-portal.org/en/article/15273	UHF (300 MHz-3 GHz) studies	Forschungsgemeinschaft Funk e.V. (FGF) (Research Association for Radio Applications), Germany & Polizei-Führungsakademie (German Police University (DHPol)), Münster, Germany	0	1
1534	Electromagnetic pulses induce fluctuations in blood pressure in rats	Li BF, Guo GZ, Ren DQ, Jing-Li, Zhang RB.	2007-06-01	Effect	Pulsed			Transverse Electromagnetic (TEM) Cell	https://www.ncbi.nlm.nih.gov/pubmed/17487681	UHF (300 MHz-3 GHz) studies	Nature Science Foundation of China	0	1
1535	Elevation of plasma corticosterone levels and hippocampal glucocorticoid receptor translocation in rats: a potential mechanism for cognition impairment following chronic low-power-density microwave exposure	Li M, Wang Y, Zhang Y, Zhou Z, Yu Z.	2008-03-01	Effect	Pulsed			Microwave	https://www.emf-portal.org/en/article/18399	UHF (300 MHz-3 GHz) studies	Nature Science Foundation of China	0	1
1536	A aquaporin 4 expression and effects in rat hippocampus after microwave radiation	Li X, Hu XJ, Peng RY, Gao YB, Wang SM, Wang LF, Xu XP, Su ZT, Yang GS.	2009-09-01	Effect	Continuous			Microwave	https://www.ncbi.nlm.nih.gov/pubmed/20137298	UHF (300 MHz-3 GHz) studies	Not Known	0	1
1537	Autoimmune processes after long-term low-level exposure to electromagnetic fields (the results of an experiment). Part 5. Impact of the blood serum from rats exposed to low-level electromagnetic fields on pregnancy, foetus and offspring development of intact female rats	Liaginskaia AM, Grigor'ev IuG, Osipov VA, Grigor'ev OA, Shafirkin AV.	2010-01-01	Effect	Continuous			RF Signal Generator	https://www.ncbi.nlm.nih.gov/pubmed/20297678	UHF (300 MHz-3 GHz) studies	Not Stated	0	1
1544	The action of pulse-modulated GSM radiation increases regional changes in brain activity and c-Fos expression in cortical and subcortical areas in a rat model of picrotoxin-induced seizure proneness	Lopez-Martin E, Bregains J, Relova-Quinteiro JL, Cadarso-Suarez C, Jorge-Barreiro FJ, Ares-Pena FJ.	2008-12-29	Effect	Continuous	Simulated		Mobile Phone GSM Simulated	https://www.emf-portal.org/en/article/16675	UHF (300 MHz-3 GHz) studies	Secretariat General for Research and Development of the Xunta de Galicia, Spain Ministerio de Educacion (Ministry of Education), Spain	0	1
1545	GSM radiation triggers seizures and increases cerebral c-Fos positivity in rats pretreated with subconvulsive doses of picrotoxin	Lopez ME, Relova-Quinteiro JL, Gallego-Gomez R, Peleteiro-Fernandez M, Jorge-Barreiro FJ, Ares-Pena FJ.	2006-05-01	Effect	Pulsed	Simulated		Mobile Phone GSM Simulated	https://www.emf-portal.org/en/article/13191	UHF (300 MHz-3 GHz) studies	Secretariat General for Research and Development of the Xunta de Galicia, Spain	0	1
1546	Effects of 900 MHz electromagnetic fields emitted by cellular phone on total cholesterol and triglyceride levels of plasma in Syrian hamsters (Mesocricetus auratus)	Lotfi A, Shahryar HA.	2009-05-01	Effect	Pulsed	Simulated		Mobile Phone GSM Simulated	https://www.emf-portal.org/en/article/18879	UHF (300 MHz-3 GHz) studies	Not Stated	0	1
1548	Absence of corneal endothelium injury in non-human primates treated with and without ophthalmologic drugs and exposed to 2.8 GHz pulsed microwaves	Lu ST, D'Andrea J, Chalfin S, Crane C, Marchello D, Garay R, Hatcher D, Ziriax J.	2010-05-01	No Effect	Pulsed			Microwave	https://www.ncbi.nlm.nih.gov/pubmed/20112259	UHF (300 MHz-3 GHz) studies	Grant sponsor: Office of Naval Research	0	1
1549	Effects of high peak power microwaves on the retina of the rhesus monkey	Lu ST, Mathur SP, Stuck B, Zwick H, D'Andrea JA, Ziriax JM, Merritt JH, Lutty G, McLeod DS, Johnson M.	2000-09-01	No Effect	Pulsed			Microwave	https://www.emf-portal.org/en/article/3904	UHF (300 MHz-3 GHz) studies	Air Force Research Laboratory (AFRL), USA. Air Force, USA Naval Medical Research and Development Command (NMRDC; at Department of Defense/U.S. Navy), USA. U.S. Army Medical Research and Development Command of U.S. Medical Research and Materiel Command (USAMRMC)	0	1
1550	Glucose administration attenuates spatial memory deficits induced by chronic low-power-density microwave exposure	Lu Y, Xu S, He M, Chen C, Zhang L, Liu C, Chu F, Yu Z, Zhou Z, Zhong M.	2012-04-28	Effect	Pulsed			RF Signal Generator	https://www.emf-portal.org/en/article/20709	UHF (300 MHz-3 GHz) studies	National Natural Science Foundation of China	0	1
1551	Changes in response of neurons in visual area of cerebral cortex of rabbits to flashes of light under the influence of low-intensity physical factors of non-ionizing nature	Lukianova SN, Alekseeva VA.	2011-07-01	Uncertain Effect	Continuous			Microwave	https://www.ncbi.nlm.nih.gov/pubmed/21950105	UHF (300 MHz-3 GHz) studies	Not Known	0	1
1568	Effects of radiofrequency exposure on the GABAergic system in the rat cerebellum: clues from semi-quantitative immunohistochemistry	Mausset AL, de Seze R, Montpeyroux F, Privat A.	2001-04-24	Effect	Pulsed	Simulated		Mobile Phone GSM Simulated	https://www.ncbi.nlm.nih.gov/pubmed/11520491	UHF (300 MHz-3 GHz) studies	France Telecom R&D, French Ministry of Research	0	1
1569	Acute exposure to GSM 900-MHz electromagnetic fields induces glial reactivity and biochemical modifications in the rat brain	Mausset-Bonnefont AL, Hirbec H, Bonnefont X, Privat A, Vignon J, de Sèze R.	2004-12-01	Effect	Pulsed	Simulated		Mobile Phone GSM Simulated	https://www.ncbi.nlm.nih.gov/pubmed/15571980	UHF (300 MHz-3 GHz) studies	France Telecom R&D, French Ministry of Research	0	1
1571	Morphological changes induced by mobile phone radiation in liver and pancreas in Wistar albino rats	Meo, SA, Arif M, Rashied S, Husain S, Khan MM, Al Masri AA, Vohra MS, Usmani AM, Husain A, Al-Drees AM.	2010-10-08	Effect	Pulsed	Real		Mobile Phone 2G GSM	https://eurjanat.com/v1/journal/paper.php?id=100017sm	UHF (300 MHz-3 GHz) studies	Medicine, Research Centre (CMRC), King Saud University, Riyadh KSA	0	1
1573	Hypospermatogenesis and spermatozoa maturation arrest in rats induced by mobile phone radiation	Meo SA, Arif M, Rashied S, Khan MM, Vohra MS, Usmani AM, Imran MB, Al-Drees AM.	2011-05-01	Effect	Pulsed	Real		Mobile Phone GSM	https://www.ncbi.nlm.nih.gov/pubmed/21575531	UHF (300 MHz-3 GHz) studies	College of Medicine Research Centre, King Saud University, Riyadh, Kingdom of Saudi Arabia	0	1
1577	Electromagnetic fields at 2.45 GHz trigger changes in heat shock proteins 90 and 70 without altering apoptotic activity in rat thyroid gland	Misa Agustiño MJ, Leiro JM, Jorge Mora MT, Rodríguez-González JA, Jorge Barreiro FJ, Ares-Pena FJ, López-Martín E.	2012-09-15	Effect	Not Stated			RF Signal Generator & Gigahertz Transverse Electromagnetic (GTEM) Cell	https://www.ncbi.nlm.nih.gov/pubmed/23213477	UHF (300 MHz-3 GHz) studies	Direccion General de Investigacion y Desarrollo of the Xunta de Galicia	0	1
1578	Long-Term Electromagnetic Field Treatment Increases Brain Neuronal Activity: Linkage to Cognitive Benefit and Therapeutic Implications for Alzheimer’s Disease	Mori T, Arendash GW.	2011-01-01	Effect	Pulsed	Simulated		Mobile Phone GSM Simulated	https://www.omicsonline.org/long-term-electromagnetic-field-treatment-increases-brain-neuronal-activity-linkage-to-cognitive-benefit-and-therapeutic-implications-for-alzheimers-disease-2161-0460.1000102.php?aid=2736	UHF (300 MHz-3 GHz) studies	NIA-designated Florida Alzheimer’s Disease Research Centre, USF/Byrd Alzheimer’s Institute to G.A.	0	1
1581	Nonthermal effects of mobile-phone frequency microwaves on uteroplacental functions in pregnant rats	Nakamura H, Matsuzaki I, Hatta K, Nobukuni Y, Kambayashi Y, Ogino K.	2003-01-26	Effect	Continuous			Magnetron	https://www.emf-portal.org/en/article/13442	UHF (300 MHz-3 GHz) studies	Ministry of Education, Sports, Science and Culture of Japan	0	1
1582	Uteroplacental circulatory disturbance mediated by prostaglandin f2alpha in rats exposed to microwaves	Nakamura H, Nagase H, Ogino K, Hatta K, Matsuzaki I.	2000-05-01	Effect	Continuous			Magnetron	https://www.ncbi.nlm.nih.gov/pubmed/10838124	UHF (300 MHz-3 GHz) studies	Grant-in Aid for Scientific Research from Ministry of Education, Science and Cultures of Japan	0	1
1591	Nonthermal GSM RF and ELF EMF effects upon rat BBB permeability	Nittby, H. Brun A, Strömblad S, Moghadam MK, Sun W, Malmgren L, Eberhardt J, Persson BR, Salford LG.	2011-01-29	Effect	Pulsed	Real		Mobile Phone GSM	https://www.emf-portal.org/en/article/19140	UHF (300 MHz-3 GHz) studies	Hans and Ma¨rit Rausing Charitable Foundation and from the Lund University Hospital research funds.	0	1
1592	Variations in amino acid neurotransmitters in some brain areas of adult and young male albino rats due to exposure to mobile phone radiation	Noor NA, Mohammed HS, Ahmed NA, Radwan NM.	2011-07-01	Effect	Not Stated			Simulated by a signal generator	https://www.ncbi.nlm.nih.gov/pubmed/21780540	UHF (300 MHz-3 GHz) studies	Granted by Sector of “International Cooperation with USA”	0	1
1595	Carcinogenicity study of 217 Hz pulsed 900 MHz electromagnetic fields in Pim1 transgenic mice	Oberto G, Rolfo K, Yu P, Carbonatto M, Peano S, Kuster N, Ebert S, Tofani S.	2006-12-03	No Effect	Pulsed	Simulated		Mobile Phone GSM Simulated	https://www.emf-portal.org/en/article/14987	UHF (300 MHz-3 GHz) studies	The PERFORM A program of the Fifth Frame-work European Union program by the European Commission, the Mobile Manufactures' forum, and the GSM Association.	0	1
1600	Absence of mutagenic effects of 2.45 GHz radiofrequency exposure in spleen, liver, brain, and testis of lacZ-transgenic mouse exposed in utero	Ono T, Saito Y, Komura J, Ikehata H, Tarusawa Y, Nojima T, Goukon K, Ohba Y, Wang J, Fujiwara O, Sato R.	2003-12-17	No Effect	Continuous			RF Signal Generator	https://www.ncbi.nlm.nih.gov/pubmed/14998303	UHF (300 MHz-3 GHz) studies	Telecommunications Advancement Organization of Japan	0	1
1602	Effects of short-duration electromagnetic radiation on early postnatal neurogenesis in rats: Fos and NADPH-d histochemical studies	Orendáčová J, Orendáč M, Mojžiš M, Labun J, Martončíková M, Saganová K, Lievajová K, Blaško J, Abdiová H, Gálik J, Račeková E.	2011-11-01	Effect	Pulsed			RF Signal Generator	https://www.ncbi.nlm.nih.gov/pubmed/20950843	UHF (300 MHz-3 GHz) studies	VEGA Projects	0	1
1603	Immunohistochemical study of postnatal neurogenesis after whole-body exposure to electromagnetic fields: evaluation of age- and dose-related changes in rats	Orendácová J, Raceková E, Orendác M, Martoncíková M, Saganová K, Lievajová K, Abdiová H, Labun J, Gálik J.	2009-09-01	Effect	Pulsed			RF Signal Generator	https://www.ncbi.nlm.nih.gov/pubmed/19305951	UHF (300 MHz-3 GHz) studies	VEGA Projects, APVV Grants	0	1
1604	Preliminary Study on the Induction of Sperm Head Abnormalities in Mice, Mus musculus, Exposed to Radiofrequency Radiations from Global System for Mobile Communication Base Stations	Otitoloju AA, Obe IA, Adewale OA, Otubanjo OA, Osunkalu VO.	2010-01-01	Effect	Pulsed	Real		Mobile Phone Base Station	https://www.ncbi.nlm.nih.gov/pubmed/19816647	UHF (300 MHz-3 GHz) studies	University of Lagos Central Research Committee (CRC) grant	0	1
1607	Biological and morphological effects on the reproductive organ of rats after exposure to electromagnetic field	Ozguner M, Koyu A, Cesur G, Ural M, Ozguner F, Gokcimen A, Delibas N.	2005-03-01	Effect	Continuous			RF Signal Generator	https://www.ncbi.nlm.nih.gov/pubmed/15806208?dopt=Abstract	UHF (300 MHz-3 GHz) studies	Not Known	0	1
1608	Effects of exposure to electromagnetic field (1.8/0.9GHz) on testicular function and structure in growing rats	Ozlem Nisbet H, Nisbet C, Akar A, Cevik M, Karayigit MO.	2012-10-01	Effect	Pulsed	Simulated		Mobile Phone GSM Simulated	https://www.ncbi.nlm.nih.gov/pubmed/22130559	UHF (300 MHz-3 GHz) studies	Scientific Research and Development Support Program of University of Ondokuz Mayis	0	1
1610	Effect of Microwave Exposure on the Ovarian Development of Drosophila melanogaster	Panagopoulos DJ.	2012-02-25	Effect	Pulsed	Real		Mobile Phone GSM	https://www.ncbi.nlm.nih.gov/pubmed/22367734	UHF (300 MHz-3 GHz) studies	Special Account for Research Grants of the University of Athens	0	1
1613	Cell death induced by GSM 900-MHz and DCS 1800-MHz mobile telephony radiation	Panagopoulos DJ, Chavdoula ED, Nezis IP, Margaritis LH.	2006-10-11	Effect	Pulsed	Real		Mobile Phone GSM	https://www.ncbi.nlm.nih.gov/pubmed/17045516	UHF (300 MHz-3 GHz) studies	Details of Grant Source not Provided	0	1
1616	No evidence of major transcriptional changes in the brain of mice exposed to 1800 MHz GSM signal	Paparini A, Rossi P, Gianfranceschi G, Brugaletta V, Falsaperla R, De Luca P, Romano Spica V.	2008-01-03	Uncertain Effect	Pulsed	Simulated		Mobile Phone GSM Simulated	https://www.emf-portal.org/en/article/15535	UHF (300 MHz-3 GHz) studies	Ministero dell' Università e della Ricerca (MIUR (formerly MURST (Ministero dell' Università e della Ricerca Scientifica e Tecnologica); Ministry of University and Research), Italy	0	1
1617	Possible combined effects of 900 MHZ continuous-wave electromagnetic fields and gentamicin on the auditory system of rats	Parazzini M, Galloni P, Piscitelli M, Pinto R, Lovisolo GA, Tognola G, Ravazzani P, Marino C.	2007-05-01	No Effect	Continuous			Microwave generator	https://www.ncbi.nlm.nih.gov/pubmed/17474791	UHF (300 MHz-3 GHz) studies	European Project GUARD "Potential adverse effects of GSM cellular phones on hearing"	0	1
1619	The effect of low level continuous 2.45 GHz waves on enzymes of developing rat brain	Paulraj R, Behari J.	2002-01-01	Effect	Continuous			RF Signal Generator	https://www.emf-portal.org/en/article/9961	UHF (300 MHz-3 GHz) studies	Defense Research and Development Organization, Ministry of Defense, Government of India	0	1
1622	Protein kinase C activity in developing rat brain cells exposed to 2.45 GHz radiation	Paulraj R, Behari J.	2009-07-07	Effect	Not Stated			Magnetron	https://www.ncbi.nlm.nih.gov/pubmed/16595335	UHF (300 MHz-3 GHz) studies	Indian Council of Medical Research (ICMR)	0	1
1623	Effects of low level microwave radiation on carcinogenesis in Swiss Albino mice	Paulraj R, Behari J.	2011-02-01	No Effect	Continuous			RF Signal Generator	https://www.ncbi.nlm.nih.gov/pubmed/21086023	UHF (300 MHz-3 GHz) studies	Not Stated	0	1
1626	Effects of chronic exposure to radiofrequency electromagnetic fields on energy balance in developing rats	Pelletier A, Delanaud S, Décima P, Thuroczy G, de Seze R, Cerri M, Bach V, Libert JP, Loos N.	2012-11-10	Effect	Continuous			Transverse Electromagnetic (TEM) Cell	https://www.ncbi.nlm.nih.gov/pubmed/23143821	UHF (300 MHz-3 GHz) studies	French Ministry of Research and a “ Post-Grenelle ” from the French Ministry of Ecology	0	1
1627	Effects of Microwaves from GSM Mobile Phones on the Blood-brain Barrier and Neurons in Rat Brain	Persson BR, Eberhardt J, Malmgren L, Persson M, Brun A, Salford L.	2005-01-01	Effect	Continuous			Transverse Electromagnetic (TEM) Cell	https://www.researchgate.net/publication/224772674_Effects_of_Microwaves_from_GSM_Mobile_Phones_on_the_Blood-brain_Barrier_and_Neurons_in_Rat_Brain	UHF (300 MHz-3 GHz) studies	Not Stated	0	1
1629	Effect of In Utero Wi-Fi Exposure on the Pre- and Postnatal Development of Rats	Poulletier de Gannes F, Haro E, Hurtier A, Taxile M, Athane A, Ait-Aissa S, Masuda H, Percherncier Y, Ruffié G, Billaudel B, Dufour P, Veyret B, Lagroye I.	2012-04-01	Uncertain Effect	Pulsed	Simulated		WiFi simulated	https://www.ncbi.nlm.nih.gov/pubmed/22311618	UHF (300 MHz-3 GHz) studies	French National Agency for Research (grant number 2008 CESA 007 01) and the French Foundation for Health and Radiofrequency which is equally funded by Government and Industry	0	1
1639	The effect of mobile phone on the number of Purkinje cells: a stereological study	Rağbetli MC, Aydinlioğlu A, Koyun N, Rağbetli C, Bektas S, Ozdemir S.	2010-07-01	Effect	Continuous	Real		Mobile Phone GSM	https://www.emf-portal.org/en/article/18342	UHF (300 MHz-3 GHz) studies	No Conflict of Interest Stated	0	1
1640	Effect of prenatal exposure to mobile phone on pyramidal cell numbers in the mouse hippocampus: a stereological study	Rağbetli MC, Aydinlioğlu A, Koyun N, Rağbetli C, Karayel M.	2009-01-01	No Effect	Pulsed	Real		Mobile Phone GSM	https://www.ncbi.nlm.nih.gov/pubmed/19466637	UHF (300 MHz-3 GHz) studies	Not Stated	0	1
1641	Effects of subchronic exposure to radio frequency from a conventional cellular telephone on testicular function in adult rats	Ribeiro EP, Rhoden EL, Horn MM, Rhoden C, Lima LP, Toniolo L.	2007-01-01	No Effect	Pulsed	Real		Mobile Phone GSM	https://www.ncbi.nlm.nih.gov/pubmed/17162098	UHF (300 MHz-3 GHz) studies	Supported by the Coordination of Improvement of Personnel of Superior Level (CAPES, Brazil) and the National Council for Scientific and Technological Development (CNPq, Brazil) (ELR).	0	1
1646	Anthropogenic Radio-Frequency Electromagnetic Fields Elicit Neuropathic Pain in an Amputation Mode	Black B, Granja-Vazquez R, Johnston BR, Jones E, Romero-Ortega M.	2016-01-01	Effect	Pulsed	Real		Mobile Phone Base Station	https://www.ncbi.nlm.nih.gov/pubmed/26760033	UHF (300 MHz-3 GHz) studies	No specific grants were received for the evaluation	0	1
1648	Prenatal Exposure to Non-ionizing Radiation: Effects of WiFi Signals on Pregnancy Outcome, Peripheral B-Cell Compartment and Antibody Production	Sambucci M, Laudisi F, Nasta F, Pinto R, Lodato R, Altavista P, Lovisolo GA, Marino C, Pioli C.	2010-12-01	No Effect	Pulsed	Simulated		WiFi simulated	https://www.emf-portal.org/en/article/18651	UHF (300 MHz-3 GHz) studies	École Pratique des Hautes Etudes, France research and higher education institutions	0	1
1649	Early life exposure to 2.45GHz WiFi-like signals: Effects on development and maturation of the immune system	Sambucci M, Laudisi F, Nasta F, Pinto R, Lodato R, Lopresto V, Altavista P, Marino C, Pioli C.	2011-12-01	Uncertain Effect	Pulsed	Real		WiFi	https://www.emf-portal.org/en/article/19613	UHF (300 MHz-3 GHz) studies	EPHE (École Pratique des Hautes Études), Paris, France.	0	1
1650	DNA and Chromosomal Damage in Residents Near a Mobile Phone Base Station	Gandhi G, Naru J, Kaur M, Kaur G.	2014-09-01	Effect	Pulsed	Real		Mobile Phone Base Station	https://www.researchgate.net/publication/287280967_DNA_and_chromosomal_damage_in_residents_near_a_mobile_phone_base_station	UHF (300 MHz-3 GHz) Ecological studies	Department of Human Genetics, Guru Nanak Dev University.	1	0
1652	Effects of exposure of newborn patched1 heterozygous mice to GSM, 900 MHz	Saran A, Pazzaglia S, Mancuso M, Rebessi S, Di Majo V, Tanori M, Lovisolo GA, Pinto R, Marino C.	2007-12-01	No Effect	Pulsed	Simulated		Mobile Phone GSM Simulated	https://www.emf-portal.org/en/article/15428	UHF (300 MHz-3 GHz) studies	MIUR/CNR-ENEA (Salvaguardia dell'uomo e dell'ambiente dalle emissioni elettromagnetiche), Italy	0	1
1653	Evaluation of the maximum permissible level of low-intensity electromagnetic radiation at mobile connection frequency (1 GHz) by changes in motor activity of Spirostomum Ambiguum	Sarapultseva EI, Igolkina JV, Litovchenko AV.	2009-08-20	Effect	Continuous			Microwave	https://www.emf-portal.org/en/article/17468	UHF (300 MHz-3 GHz) studies	Not Stated	0	1
1656	Testicular apoptosis and histopathological changes induced by a 2.45 GHz electromagnetic field	Sarookhani, MR, Safari A, Zahedpanah, M, Zaroushani V.	2011-06-01	Effect	Pulsed			RF Signal Generator	https://www.emf-portal.org/en/article/19016	UHF (300 MHz-3 GHz) studies	S.D.U. (Suleyman Demirel University) Unit of Scientific Research Projects, Turkey	0	1
1657	Acute effects of pulsed microwaves and 3-nitropropionic acid on neuronal ultrastructure in the rat caudate-putamen	Seaman RL, Phelix CF.	2005-01-25	Effect	Pulsed			Microwave	https://www.emf-portal.org/en/article/11573	UHF (300 MHz-3 GHz) studies	U.S. Medical Research and Materiel Command (USAMRMC)	0	1
1658	Cytotoxic and genotoxic effects of high-frequency electromagnetic fields (GSM 1800MHz) on immature and mature rats	Sekeroglu V, Akar A, Sekeroglu ZA.	2010-06-01	Effect	Pulsed	Simulated		Mobile Phone GSM Simulated	https://www.emf-portal.org/en/article/20362	UHF (300 MHz-3 GHz) studies	Not Stated	0	1
1659	Effects of Exposure to Cellular Phones 950 MHZ Electromagnetic Fields on Progesterone, Cortisol and Glucose Level in Female Hamsters (Mesocricetus auratus)	Seyednour R, Chekaniazar V.	2011-06-01	Effect	Pulsed	Simulated		Mobile Phone GSM Simulated	https://www.emf-portal.org/en/article/20313	UHF (300 MHz-3 GHz) studies	Not stated	0	1
1660	Investigation on blood-brain barrier permeability and collagen synthesis under radiofrequency radiation exposure and SAR simulations of adult and child head	Seyhan, N. Goknur Guler, Ayse Canseven, Bahriye Sirav, Elcin Ozgur,	2010-01-01	Effect	Continuous			Microwave	https://www.emf-portal.org/en/article/18907	UHF (300 MHz-3 GHz) studies	Grant from Gazi UniversityResearch Foundation, Project No: 01/2003-62.	0	1
1662	Changes in honeybee behaviour and biology under the influence of cellphone radiations	Sharma, VP, Kumar NR.	2010-05-25	Effect	Pulsed	Real		Mobile Phone 2G GSM	https://www.emf-portal.org/en/article/18302	UHF (300 MHz-3 GHz) studies	Not Stated	0	1
1663	Effects of mobile-phone microwave on dimethylbenz (a) anthracene induced mammary carcinoma development in rats	Shen YH, Yu D, Fu YT, Chiang H.	2006-05-01	No Effect	Pulsed	Simulated		Mobile Phone GSM Simulated	https://www.ncbi.nlm.nih.gov/pubmed/16836878	UHF (300 MHz-3 GHz) studies	Not Known	0	1
1664	Lack of promoting effects of chronic exposure to 1.95-GHz W-CDMA signals for IMT-2000 cellular system on development of N-ethylnitrosourea-induced central nervous system tumors in F344 rats	Shirai T, Ichihara T, Wake K, Watanabe S, Yamanaka Y, Kawabe M, Taki M, Fujiwara O, Wang J, Takahashi S, Tamano S.	2007-10-01	No Effect	Pulsed	Real		Mobile Phone W-CDMA	https://www.ncbi.nlm.nih.gov/pubmed/17516507	UHF (300 MHz-3 GHz) studies	Ministry of Internal Affairs and Communications, Japan (former Ministry of Public Management, Home Affairs, Posts and Telecommunications, Japan	0	1
1665	Chronic exposure to a 1.439 GHz electromagnetic field used for cellular phones does not promote N-ethylnitrosourea induced central nervous system tumors in F344 rats	Shirai T, Kawabe M, Ichihara T, Fujiwara O, Taki M, Watanabe S, Wake K, Yamanaka Y, Imaida K, Asamoto M, Tamano S.	2004-12-16	No Effect	Pulsed			TDMA low level microwave	https://www.ncbi.nlm.nih.gov/pubmed/15605402	UHF (300 MHz-3 GHz) studies	Ministry of Public Management, Home Affairs, Posts and Telecommunications, Japan	0	1
1670	Chronic non-thermal exposure of modulated 2450 MHz microwave radiation alters thyroid hormones and behavior of male rat	Sinha RK.	2008-06-01	Effect	Square			RF Signal Generator	https://www.emf-portal.org/en/article/16182	UHF (300 MHz-3 GHz) studies	Not Stated	0	1
1671	Blood-brain barrier disruption by continuous-wave radio frequency radiation	Sirav B, Seyhan N.	2009-01-01	Effect	Continuous			Microwave	https://www.emf-portal.org/en/article/17230	UHF (300 MHz-3 GHz) studies	Gazi University Research Foundation, Turkey	0	1
1672	GSM and DCS wireless communication signals: combined chronic toxicity/carcinogenicity study in the Wistar rat	Smith P, Kuster N, Ebert S, Chevalier HJ.	2007-10-01	No Effect	Pulsed	Simulated		Mobile Phone GSM Simulated	https://www.emf-portal.org/en/article/15120	UHF (300 MHz-3 GHz) studies	European Union (EU)/European Commission & GSM Association, UK/Ireland & Mobile Manufacturers Forum (MMF), Belgium & European Project PERFORM-A State Secretariat for Education and Research (SER; Staatssekretariat für Bildung und Forschung), Switzerland	0	1
1675	Melatonin protects rat thymus against oxidative stress caused by exposure to microwaves and modulates proliferation/apoptosis of thymocytes	Sokolovic D, Djordjevic B, Kocic G, Veljkovic A, Marinkovic M, Basic J, Jevtovic-Stoimenov T, Stanojkovic Z, Sokolovic DM, Pavlovic V, Djindjic B, Krstic D.	2013-03-01	Effect	Pulsed	Simulated	1	Mobile Phone GSM Simulated	https://www.emf-portal.org/en/article/21991	UHF (300 MHz-3 GHz) studies	Ministry for Science and Technology Development, Serbia	0	1
1676	The effect of melatonin on body mass and behaviour of rats during an exposure to microwave radiation from mobile phone	Sokolovic D, Djordjevic B, Kocic G, Babovic P, Ristic G, Stanojkovic Z, Sokolovic DM, Veljkovic A, Jankovic A, Radovanovic Z.	2012-05-01	Effect	Continuous	Simulated		Mobile Phone GSM Simulated	https://www.emf-portal.org/en/article/20782	UHF (300 MHz-3 GHz) studies	Ministry for Science and Technology Development, Serbia	0	1
1679	Purkinje cell number decreases in the adult female rat cerebellum following exposure to 900 MHz electromagnetic field	Sonmez OF, Odaci E, Bas O, Kaplan S.	2010-08-04	Effect	Pulsed	Simulated		Mobile Phone GSM Simulated	https://www.ncbi.nlm.nih.gov/pubmed/20691167	UHF (300 MHz-3 GHz) studies	Not Stated	0	1
1680	Assessment of proliferative activity in rat brain with AgNOR following exposure to magnetic field	Sorkun CH, Yalcin N, Erken G, Erken HA, Genc O.	2009-01-01	Effect	Pulsed	Real		Mobile Phone	https://www.researchgate.net/publication/26637277_Assessment_of_Proliferative_Activity_in_Rat_Brain_With_AgNOR_Following_Exposure_to_Magnetic_Field	UHF (300 MHz-3 GHz) studies	Not Known	0	1
1681	Effect of immobilization and concurrent exposure to a pulse-modulated microwave field on core body temperature, plasma ACTH and corticosteroid, and brain ornithine decarboxylase, Fos and Jun mRNA	Stagg RB, Hawel LH, Pastorian K, Cain C, Adey WR, Byus CV.	2001-04-01	Uncertain Effect	Pulsed	Simulated		Mobile Phone GSM Simulated	https://www.emf-portal.org/en/article/6387	UHF (300 MHz-3 GHz) studies	Motorola Corporation awarded to the University of California (WRA and CVB).	0	1
1682	Immunotropic influence of 900 MHz microwave GSM signal on human blood immune cells activated in vitro	Stankiewicz W, Dabrowski MP, Kubacki R, Sobiczewska E, Szmigielski S	2009-07-07	Effect	Pulsed	Simulated		Mobile Phone GSM Simulated	https://www.emf-portal.org/en/article/13731	UHF (300 MHz-3 GHz) studies	Not Stated	1	0
1686	Effect of exposure to 900 MHz radiofrequency radiation on intrachromosomal recombination in pKZ1 mice	Sykes PJ, McCallum BD, Bangay MJ, Hooker AM, Morley AA.	2001-11-01	Effect	Pulsed	Simulated		Mobile Phone GSM Simulated	https://www.emf-portal.org/de/article/7646	UHF (300 MHz-3 GHz) studies	National Health and Medical Research Council (NHMRC), Australia	0	1
1688	Lack of mutation induction with exposure to 1.5 GHz electromagnetic near fields used for cellular phones in brains of Big Blue mice	Takahashi S, Inaguma S, Cho YM, Imaida K, Wang J, Fujiwara O, Shirai T.	2002-04-01	No Effect	Pulsed	Simulated		RF Signal Mobile Phone TDMA Simulated	https://www.emf-portal.org/en/article/8665	UHF (300 MHz-3 GHz) studies	Association of Radio Industries and Businesses (ARIB), Japan	0	1
1689	Post-continuous whole body exposure of rabbits to 650 MHz electromagnetic fields: effects on liver, spleen, and brain	Tarantino P, Lanubile R, Lacalandra G, Abbro L, Dini L.	2005-04-06	Effect	Pulsed			Microwave	https://www.emf-portal.org/en/article/11804	UHF (300 MHz-3 GHz) studies	Not Stated	0	1
1690	Effects of exposure to low level radiofrequency fields on acetylcholine release in hippocampus of freely moving rats	Testylier G, Tonduli, Malabiau, LR ,Debouzy JC	2002-04-02	Effect	Continuous			RF Signal Generator	http://onlinelibrary.wiley.com/doi/10.1002/bem.10008/abstract	UHF (300 MHz-3 GHz) studies	Not Stated	0	1
1692	Carcinogenicity study of GSM and DCS wireless communication signals in B6C3F1 mice	Tillmann T, Ernst H, Ebert S, Kuster N, Behnke W, Rittinghausen S, Dasenbrock C.	2006-10-03	No Effect	Pulsed			Microwave	https://www.emf-portal.org/en/article/14236	UHF (300 MHz-3 GHz) studies	European Union (EU)/European Commission GSM Association, UK/Ireland Mobile Manufacturers Forum (MMF), Belgium & Austrian Government & Swiss Government	0	1
1693	Indication of cocarcinogenic potential of chronic UMTS-modulated radiofrequency exposure in an ethylnitrosourea mouse mode	Tillmann T, Ernst H, Streckert J, Zhou Y, Taugner F, Hansen V, Dasenbrock C.	2010-07-01	Effect	Pulsed			UMTS	https://www.emf-portal.org/en/article/18344	UHF (300 MHz-3 GHz) studies	Compagnia di San Paolo, Torino, Italy.	0	1
1695	Frequency of micronuclei in the peripheral blood and bone marrow of cancer-prone mice chronically exposed to 2450 MHz radiofrequency radiation	Vijayalaxmi, Frei MR, Dusch SJ, Guel V, Meltz ML, Jauchem JR.	1997-04-01	Effect	Continuous			Microwave Signal Generator	https://www.ncbi.nlm.nih.gov/pubmed/9092931	UHF (300 MHz-3 GHz) studies	This work was supported by the U.S. Air Force grant No. F33615-90-0606	0	1
1696	Multinucleated giant cell appearance after whole body microwave irradiation of rats	Trosic I.	2001-05-23	Effect	Not Stated			Microwave Oven	https://www.ncbi.nlm.nih.gov/pubmed/11759156	UHF (300 MHz-3 GHz) studies	Not Stated	0	1
1697	Erythropoietic dynamic equilibrium in rats maintained after microwave irradiation	Trosic I, Busljeta I.	2006-01-01	Effect	Not Stated			RF Signal Generator	http://www.sciencedirect.com/science/article/pii/S0940299305000825	UHF (300 MHz-3 GHz) studies	Research supported by Ministry of Science, Education and Sports, Republic of Croatia, Grant No. 0022005	0	1
1698	Micronucleus induction after whole-body microwave irradiation of rats	Trosic I, Busljeta I, Kasuba V, Rozgaj R.	2002-11-01	Effect	Continuous			Microwave	https://www.ncbi.nlm.nih.gov/pubmed/12438005	UHF (300 MHz-3 GHz) studies	Not Stated	0	1
1699	Investigation of the genotoxic effect of microwave irradiation in rat bone marrow cells: in vivo exposure	Trosic I, Busljeta I, Modlic B.	2004-09-01	Effect	Continuous			Microwave	https://www.ncbi.nlm.nih.gov/pubmed/15388808	UHF (300 MHz-3 GHz) studies	Not Stated	0	1
1700	Blood-forming system in rats after whole-body microwave exposure; reference to the lymphocytes	Trosic I, Busljeta I, Pavicic I.	2004-09-13	Effect	Not Stated			Microwave	https://www.ncbi.nlm.nih.gov/pubmed/15475186	UHF (300 MHz-3 GHz) studies	Ministry of Science, Education and Sports, Republic of Croatia	0	1
1701	Effect of electromagnetic radiofrequency radiation on the rats' brain, liver and kidney cells measured by comet assay	Trosic I, Pavicic I, Milkovic-Kraus S, Mladinic M, Zeljezic D.	2011-12-01	Effect	Pulsed	Simulated		Mobile Phone GSM Simulated	https://www.emf-portal.org/en/article/20359	UHF (300 MHz-3 GHz) studies	Ministry of Science, Education and Sports, Republic of Croatia	0	1
1702	Frequency of Micronucleated Erythrocytes in Rat Bone Marrow Exposed to 2.45 GHz Radiation	Trosic I, Busljeta I.	2005-01-01	Effect	Continuous			Microwave	http://iopscience.iop.org/article/10.1238/Physica.Topical.118a00168	UHF (300 MHz-3 GHz) studies	Supported by Ministry of Science, Education and Sports, Republic of Croatia, Grant No. 0022005	0	1
1703	Biological and morphological effects on the brain after exposure of rats to a 1439 MHz TDMA field	Tsurita G, Nagawa H, Ueno S, Watanabe S, Taki M.	2000-07-01	No Effect	Pulsed			TDMA low level microwave	https://www.emf-portal.org/en/article/3914	UHF (300 MHz-3 GHz) studies	Ministry of Education, Culture, and Science,& Ministry of Posts and Telecommunications, Japan	0	1
1706	Biological effect on blood cerebrospinal fluid barrier due to radio frequency electromagnetic fields exposure of the rat brain in vivo	Ushiyama, A, Masuda H, Hirota S, Wake K, Kawai H, Watanabe S, Taki M, Ohkubo C.	2007-07-01	No Effect	Pulsed			TDMA low level microwave	https://www.emf-portal.org/en/article/15808	UHF (300 MHz-3 GHz) studies	Ministry of Health, Labour and Welfare, Japan	0	1
1707	Effect of Radiofrequency Electromagnetic Field Exposure on Hematological Parameters of Mice	Usman AD, Wan Ahmad F, Ab Kadir M, Mokhtar M, Ariffin R.	2012-01-01	Effect	Not Stated			RF Signal Generator	http://www.idosi.org/wasj/wasj16(5)12/5.pdf	UHF (300 MHz-3 GHz) studies	Not Stated	0	1
1708	Long-term exposure of E-mu-Pim1 transgenic mice to 898.4 MHz microwaves does not increase lymphoma incidence	Utteridge TD, Gebski V, Finnie JW, Vernon-Roberts B, Kuchel TR.	2002-09-01	No Effect	Pulsed	Simulated		Mobile Phone GSM Simulated	https://www.emf-portal.org/en/article/9121	UHF (300 MHz-3 GHz) studies	National Health and Medical Research Council (NHMRC), Australia	0	1
1709	Pulsed and continuous radiofrequency current adjacent to the cervical dorsal root ganglion of the rat induces late cellular activity in the dorsal horn	Van Zundert J, de Louw AJ, Joosten EA, Kessels AG, Honig W, Dederen PJ, Veening JG, Vles JS, van Kleef M.	2005-01-01	Effect	Pulsed			RF Signal Generator	https://www.ncbi.nlm.nih.gov/pubmed/15618796	UHF (300 MHz-3 GHz) studies	Not Stated	0	1
1710	Investigation of co-genotoxic effects of radiofrequency electromagnetic fields in vivo	Verschaeve L, Heikkinen P, Verheyen G, Van Gorp U, Boonen F, Vander Plaetse F, Maes A, Kumlin T, Mäki-Paakkanen J, Puranen L, Juutilainen J.	2006-05-01	No Effect	Amplitude Modulation	Simulated		Mobile Phone GSM Simulated	https://www.ncbi.nlm.nih.gov/pubmed/16669742	UHF (300 MHz-3 GHz) studies	European Commission 5th framework project on Combined Effects of Electro Magnetic Fields with Environmental Carcinogens (CEM-FEC)	0	1
1713	Micronuclei in the peripheral blood and bone marrow cells of rats exposed to 2450 MHz radiofrequency radiation	Vijayalaxmi, Pickard WF, Bisht KS, Prihoda TJ, Meltz ML, LaRegina MC, Roti Roti JL, Straube WL, Moros EG.	2001-11-01	No Effect	Continuous			RF Signal Generator	https://www.ncbi.nlm.nih.gov/pubmed/11683981	UHF (300 MHz-3 GHz) studies	Motorola Corporate Laboratories, United States Air Force	0	1
1714	Genotoxic potential of 1.6 GHz wireless communication signal: in vivo two-year bioassay	Vijayalaxmi, Sasser LB, Morris JE, Wilson BW, Anderson LE.	2003-04-01	No Effect	Continuous	Simulated		Mobile Phone Iridium Simulated	https://www.emf-portal.org/en/article/9893	UHF (300 MHz-3 GHz) studies	Motorola and Air Force, USA	0	1
1715	Potential Impact of Simulated Mobile Phone Radiation on Blood-Brain Barrier	Vojtisek M, Knotkova J, Kasparova L, Hornychova M, Frantik M, Svandova E.	2009-07-01	Effect	Pulsed	Simulated		Mobile Phone Simulated	https://www.emf-portal.org/en/article/13487	UHF (300 MHz-3 GHz) studies	COST OC 281.004 grant from the MŠMT. The Ministry of Education, Youth and Sports	0	1
1716	Repeated exposure to low-level extremely low frequency-modulated microwaves affects baseline and scopolamine-modified electroencephalograms in freely moving rats	Vorobyov V, Pesic V, Janac B, Prolic Z.	2004-09-01	Effect	Pulsed	Simulated		Mobile Phone GSM Simulated	https://www.emf-portal.org/en/article/13578	UHF (300 MHz-3 GHz) studies	Ministry for Science and Technology Development, Serbia	0	1
1718	Regional distribution of Hsp70 in the CNS of young and old food-restricted rats following hyperthermia	Walters TJ, Ryan KL, Mason PA.	2001-06-01	Effect	Continuous			Microwave Heating Device	https://www.emf-portal.org/en/article/7266	UHF (300 MHz-3 GHz) studies	Air Force, USA	0	1
1719	Acute exposure to pulsed 2450-MHz microwaves affects water-maze performance of rats	Wang B, Lai H.	2000-01-01	Effect	Pulsed			RF Signal Generator	https://www.emf-portal.org/en/article/3955	UHF (300 MHz-3 GHz) studies	National Institute of Environmental Health Sciences (NIEHS), North Carolina, USA	0	1
1721	Effect of Exposure to 1,800 MHz Electromagnetic Fields on Heat Shock Proteins and Glial Cells in the Brain of Developing Rats	Watilliaux A, Edeline JM, Leveque P, Jay TM, Mallat M.	2011-08-01	Uncertain Effect	Pulsed	Simulated		Mobile Phone GSM Simulated	https://www.emf-portal.org/en/article/18724	UHF (300 MHz-3 GHz) studies	Centre National de la Recherche Scientifique (CNRS; French National Center for Scientific Research), France	0	1
1723	Effects of mobile phone radiation on reproduction and development in Drosophila melanogaster	Weisbrot D, Lin H, Ye L, Blank M, Goodman R.	2003-05-01	Effect	Pulsed	Real		Mobile Phone 2G GSM	https://www.emf-portal.org/en/article/13481	UHF (300 MHz-3 GHz) studies	Not Stated	0	1
1729	1439 MHz pulsed TDMA fields affect performance of rats in a T-maze task only when body temperature is elevated	Yamaguchi H, Tsurita G, Ueno S, Watanabe S, Wake K, Taki M, Nagawa H.	2003-04-08	Effect	Pulsed			Microwave	https://www.emf-portal.org/en/article/9845	UHF (300 MHz-3 GHz) studies	Ministry of Public Management, Home Affairs, Posts and Telecommunications, Japan	0	1
1730	Short-term exposure to a 1439-MHz TDMA signal exerts no estrogenic effect in rats	Yamashita H, Hata K, Yamaguchi H, Tsurita G, Wake K, Watanabe S, Taki M, Ueno S, Nagawa H.	2010-10-01	No Effect	Pulsed			TDMA low level microwave	https://www.emf-portal.org/en/article/18428	UHF (300 MHz-3 GHz) studies	Ministry of Internal Affairs and Communications, Japan	0	1
1731	Effects of cellular phone emissions on sperm motility in rats	Yan JG, Agresti M, Bruce T, Yan YH, Granlund A, Matloub HS.	2007-10-01	Effect	Pulsed	Real		Mobile Phone CDMA	https://www.emf-portal.org/en/article/14886	UHF (300 MHz-3 GHz) studies	Not Stated	0	1
1732	Qualitative effect on mRNAs of injury-associated proteins by cell phone like radiation in rat facial nerves	Yan JG, Agresti M, Zhang LL, Yan Y, Matloub HS.	2009-12-17	Effect	Pulsed	Real		Mobile Phone CDMA	https://www.emf-portal.org/en/article/17816	UHF (300 MHz-3 GHz) studies	Not Stated	0	1
1733	Exposure to 2.45GHz electromagnetic fields elicits an HSP-related stress response in rat hippocampus	Yang XS, He GL, Hao YT, Xiao Y, Chen CH, Zhang GB, Yu ZP.	2012-04-09	Effect	Pulsed			RF Signal Generator	https://www.emf-portal.org/en/article/20588	UHF (300 MHz-3 GHz) studies	National Natural Science Foundation (NSFC), China	0	1
1734	Nitric oxide level in the nasal and sinus mucosa after exposure to electromagnetic field	Yariktas M, Doner F, Ozguner F, Gokalp O, Dogru H, Delibas N.	2005-05-01	Effect	Continuous			Microwave	https://www.emf-portal.org/en/article/11956	UHF (300 MHz-3 GHz) studies	Not Stated	0	1
1735	Low power density microwave radiation induced early changes in rabbit lens epithelial cells	Ye J, Yao K, Lu D, Wu R, Jiang H.	2001-12-01	Effect	Not Stated			RF Signal Generator	https://www.emf-portal.org/en/article/12457	UHF (300 MHz-3 GHz) studies	not stated	0	1
1736	Changes in gap junctional intercellular communication in rabbits lens epithelial cells induced by low power density microwave radiation	Ye J, Yao K, Zeng Q, Lu D.	2002-12-01	Effect	Not Stated			RF Signal Generator	https://www.emf-portal.org/en/article/12454	UHF (300 MHz-3 GHz) studies	Not Stated	0	1
1738	Whole-body exposure of radiation emitted from 900 MHz mobile phones does not seem to affect the levels of anti-apoptotic bcl-2 protein	Yilmaz F, Dasdag S, Akdag Z, Kilinc N.	2009-07-07	No Effect	Pulsed	Real		Mobile Phone GSM	https://www.emf-portal.org/en/article/15744	UHF (300 MHz-3 GHz) studies	Not Stated	0	1
1739	Effects of 900 MHz GSM wireless communication signals on DMBA-induced mammary tumors in rats	Yu D, Shen Y, Kuster N, Fu Y, Chiang H.	2006-02-01	No Effect	Pulsed	Simulated		Mobile Phone GSM Simulated	https://www.emf-portal.org/en/article/13171	UHF (300 MHz-3 GHz) studies	GSM Association, UK/Ireland & Mobile Manufacturers Forum (MMF), Belgium	0	1
1740	Derangement of chick embryo retinal differentiation caused by radiofrequency electromagnetic fields	Zareen N, Khan MY, Minhas LA.	2009-02-18	Effect	Pulsed	Real		Mobile Phone	https://www.emf-portal.org/en/article/16833	UHF (300 MHz-3 GHz) studies	Not Stated	0	1
1741	Dose related shifts in the developmental progress of chick embryos exposed to mobile phone induced electromagnetic fields	Zareen N, Khan MY, Minhas LA.	2009-01-01	Effect	Pulsed	Real		Mobile Phone	https://www.ncbi.nlm.nih.gov/pubmed/20364761	UHF (300 MHz-3 GHz) studies	not known	0	1
1743	Absence of genotoxic potential of 902 MHz (GSM) and 1747 MHz (DCS) wireless communication signals: In vivo two-year bioassay in B6C3F1 mice	Ziemann C, Brockmeyer H, Reddy SB, Vijayalaxmi, Prihoda TJ, Kuster N, Tillmann T, Dasenbrock C.	2009-05-01	No Effect	Pulsed	Simulated		Mobile Phone GSM Simulated	https://www.ncbi.nlm.nih.gov/pubmed/19365745	UHF (300 MHz-3 GHz) studies	European Commission (EC, Brussels, Belgium) the Swiss and Austrian government, the GSM (Global System for Mobile Communications) Association (Geneva, Switzerland) and the Mobile Manufactures Forum (MMF, Brussels, Belgium)	0	1
1744	The effects of 860 MHz radiofrequency radiation on the induction or promotion of brain tumors and other neoplasms in rats	Zook BC, Simmens SJ.	2001-04-01	No Effect	Pulsed			Microwave	https://www.emf-portal.org/en/article/6198	UHF (300 MHz-3 GHz) studies	Motorola	0	1
1745	The effects of pulsed 860 MHz radiofrequency radiation on the promotion of neurogenic tumors in rat	Zook BC, Simmens SJ.	2008-05-01	No Effect	Pulsed			Microwave	https://www.emf-portal.org/en/article/13791	UHF (300 MHz-3 GHz) studies	Motorola	0	1
1748	Mobile phone affects cerebral blood flow in humans	Aalto S, Haarala C, Bruck A, Sipila H, Hämäläinen H, Rinne JO.	2006-07-01	Effect	Pulsed	Real		Mobile Phone	https://www.emf-portal.org/en/article/13424	UHF (300 MHz-3 GHz) studies		0	1
1753	Effect of mobile phone radiation on heart rate variability	Ahamed VI, Karthick NG, Joseph PK.	2008-06-01	Uncertain Effect	Pulsed	Real		Mobile Phone GSM	https://www.emf-portal.org/en/article/15982	UHF (300 MHz-3 GHz) studies	Not Stated	0	1
1755	Measurements of skin surface temperature during mobile phone use	Anderson V, Rowley J.	2006-11-01	Uncertain Effect	Pulsed	Real		Mobile Phone 2G GSM	https://www.emf-portal.org/en/article/14340	UHF (300 MHz-3 GHz) studies	Telstra Research Laboratories, Melbourne, Australia	0	1
1757	Thirty minutes mobile phone use has no short-term adverse effects on central auditory pathways	Arai N, Enomoto H, Okabe S, Yuasa K, Kamimura Y, Ugawa Y.	2003-08-01	No Effect	Pulsed	Real		Mobile Phone	https://www.emf-portal.org/en/article/10091	UHF (300 MHz-3 GHz) studies	Association of Radio Industries and Businesses (ARIB), Japan	0	1
1771	The effect of GSM and TETRA mobile handset signals on blood pressure, catechol levels and heart rate variability	Barker AT, Jackson PR, Parry H, Coulton LA, Cook GG, Wood SM.	2007-09-01	No Effect	Pulsed	Simulated		Mobile Phone GSM Simulated	https://www.ncbi.nlm.nih.gov/pubmed/17486598	UHF (300 MHz-3 GHz) studies	UK MTHR programme (MTHR 2002).	0	1
1778	Single-strand DNA breaks in human hair root cells exposed to mobile phone radiation	Cam ST, Seyhan N.	2012-05-01	Effect	Pulsed	Real		Mobile Phone GSM	https://www.ncbi.nlm.nih.gov/pubmed/22348707	UHF (300 MHz-3 GHz) studies	No Conflict of Interest Stated	0	1
1803	Effects of a 902 MHz mobile phone on cerebral blood flow in humans: a PET study	Haarala C, Aalto S, Hautzel H, Julkunen L, Rinne JO, Laine M, Krause B, Hämäläinen H.	2003-11-14	Uncertain Effect	Pulsed	Real		Mobile Phone GSM	https://www.ncbi.nlm.nih.gov/pubmed/14600490	UHF (300 MHz-3 GHz) studies	University of Turku, National Technology Agency of Finland and Finnish mobile phone industry (Nokia Research Centre, Sonera Corporation, Elisa Communications Corporation, Benefon Oyj, and Finnish 2G).	0	1
1841	Mobile phone radiation might alter protein expression in human skin	Karinen A, Heinävaara S, Nylund R, Leszczynski D.	2008-02-11	Uncertain Effect	Pulsed	Real		Mobile Phone 2G GSM	https://www.ncbi.nlm.nih.gov/pubmed/18267023	UHF (300 MHz-3 GHz) studies	Funding was provided by Tekes – Finnish Funding Agency for Technology and Innovation (HERMO project) and by STUK- Radiation and Nuclear Safety Authority.	0	1
1845	Microwave radiation from cellular phones increases allergen-specific IgE production	Kimata H.	2005-05-06	Effect	Pulsed	Real		Mobile Phone CDMA	https://www.emf-portal.org/en/article/12171	UHF (300 MHz-3 GHz) studies	Not Stated	0	1
1957	The effect of electromagnetic waves on the growth of Entamoeba histolytica and Entamoeba dispar	Aksoy U, Sahin S, Ozkoc S, Ergor G.	2005-09-01	Effect	Pulsed	Real		Mobile Phone GSM	https://www.emf-portal.org/en/article/12499	UHF (300 MHz-3 GHz) studies	Not Stated	1	0
1959	The effects of electromagnetic fields on peripheral blood mononuclear cells in vitro	Atasoy A, Sevim Y, Kaya I, Yilmaz M, Durmus A, Sonmez M, Omay SB, Ozdemir F, Ovali E.	2009-01-01	Effect	Pulsed	Real		Mobile Phone GSM	https://www.emf-portal.org/en/article/17621	UHF (300 MHz-3 GHz) studies	not stated	1	0
1962	Non-thermal effects of 2.45GHz microwaves on spindle assembly, mitotic cells and viability of Chinese hamster V-79 cells	Ballardin M, Tusa I, Fontana N, Monorchio A, Pelletti C, Rogovich A, Barale R, Scarpato R.	2011-11-01	Effect	Continuous			RF Signal Generator	https://www.emf-portal.org/en/article/19499	UHF (300 MHz-3 GHz) studies	Not Stated	1	0
1963	Evaluating the combinative effects on human lymphocyte DNA damage induced by ultraviolet ray C plus 1.8 GHz microwaves using comet assay in vitro	Baohong W, Lifen J, Lanjuan L, Jianlin L, Deqiang L, Wei Z, Jiliang H.	2007-04-11	Effect	Not Stated			RF Signal Generator and Transverse Electromagnetic Transmission (TEM) Cell	https://www.ncbi.nlm.nih.gov/pubmed/17336440	UHF (300 MHz-3 GHz) studies	National Natural Science Foundation of China, the Natural Science Foundation of Zhejiang Province and International Cooperative Foundation of Science-Technique Bureau of Zhejiang Province	1	0
1964	Structural and kinetic effects of mobile phone microwaves on acetylcholinesterase activity	Barteri M, Pala A, Rotella S.	2005-03-01	Effect	Pulsed	Real		Mobile Phone GSM	https://www.ncbi.nlm.nih.gov/pubmed/15620509	UHF (300 MHz-3 GHz) studies	MURST and by the Training and Mobility of Researchers (TMR) Program of the European Community for the SAXS experiments at L.U.R.E. (Fr)	1	0
1965	Responses of neurons to an amplitude modulated microwave stimulus	Beason RC, Semm P.	2002-11-01	Effect	Pulsed	Simulated		Mobile Phone GSM Simulated	https://www.ncbi.nlm.nih.gov/pubmed/12429376	UHF (300 MHz-3 GHz) studies	Not Known	1	0
1966	A suitable plane transmission line at 900 MHz rf fields for E. coli DNA studies	Belloni, F, Nassisi V, Alifano P, Monaco C, Tala A, Tredici M, Raino A.	2005-04-01	Effect	Not Stated			RF Signal Generator	https://www.emf-portal.org/en/article/16862	UHF (300 MHz-3 GHz) studies	Ministero dell' Università e della Ricerca (MIUR (formerly MURST (Ministero dell' Università e della Ricerca Scientifica e Tecnologica); Ministry of University and Research), Italy	1	0
1967	Microwaves from Mobile Phones Inhibit 53BP1 Focus Formation in Human Stem Cells More Strongly Than in Differentiated Cells: Possible Mechanistic Link to Cancer Risk	Markova E, Malmgren L, Belyaev I.	2010-03-01	Effect	Pulsed	Simulated		Test Mobile Phone GSM with a Transverse Electromagnetic Line (TEM) Cell	https://www.emf-portal.org/en/article/17858	UHF (300 MHz-3 GHz) studies	Swedish Council for Working Life and Social Research (FAS); Swedish Animal Welfare Agency; Swedish Radiation Protection Authority (SSI); National Scholarship Program, Slovak Republic; VEGA (Scientific Grant Agency), Slovakia	1	0
1970	Microwave induced shift of the main phase transition in phosphatidylcholine membranes	Beneduci A, Filippelli L, Cosentino K, Calabrese ML, Massa R, Chidichimo G.	2012-04-01	Effect	Continuous			Microwave	https://www.ncbi.nlm.nih.gov/pubmed/22082754	UHF (300 MHz-3 GHz) studies	Regione Calabria	1	0
1971	Effects of exposure to DAMPS and GSM signals on Ornithine Decarboxylase (ODC) activity: II. SH-SY5Y human neuroblastoma cells	Billaudel B, Taxile M, Poulletier de Gannes F, Ruffie G, Lagroye I, Veyret B.	2009-06-01	No Effect	Pulsed	Simulated		Mobile Phone GSM Simulated	https://www.emf-portal.org/en/article/17094	UHF (300 MHz-3 GHz) studies	Mobile Manufacturers Forum and GSM Association (PERFORM B programme)	1	0
1972	Effects of exposure to DAMPS and GSM signals on ornithine decarboxylase (ODC) activity: I. L-929 mouse fibroblasts	Billaudel B, Taxile M, Ruffie G, Veyret B, Lagroye I.	2009-06-01	No Effect	Pulsed	Real		Mobile Phone GSM	https://www.emf-portal.org/en/article/17093	UHF (300 MHz-3 GHz) studies	Aquitaine Research Council, Franc ; Centre National de la Recherche Scientifique (CNRS; French National Center for Scientific Research), France ; GSM Association, UK/Irela ;Mobile Manufacturers Forum (MMF), Belgium; European Project PERFORM- ; École Pratique des Hautes Etudes, France	1	0
1973	The effect of 835.62 MHz FDMA or 847.74 MHz CDMA modulated radiofrequency radiation on the induction of micronuclei in C3H 10T(1/2) cells	Bisht KS, Moros EG, Straube WL, Baty JD, Roti Roti JL.	2002-05-01	No Effect	Pulsed	Simulated		Mobile Phone FDMA Simulated	https://www.emf-portal.org/en/article/8831	UHF (300 MHz-3 GHz) studies	Motorola ; National Cancer Institute (NCI; U.S. National Institutes of Health), Maryland, USA Department of Radiation Oncology, Mallinckrodt Institute of Radiology, Washington University School of Medicine, St. Louis, Missouri, USA	1	0
1974	Are the conformational dynamics and the ligand binding properties of myoglobin affected by exposure to microwave radiation?	Bismuto E, Mancinelli F, d'Ambrosio G, Massa R.	2003-11-01	No Effect	Continuous			Microwave	https://www.emf-portal.org/en/article/10382	UHF (300 MHz-3 GHz) studies	Ministry of Health, Italy	1	0
1977	Cytogenetic Studies in Human Cells Exposed In Vitro to GSM-900 MHz Radiofrequency Radiation Using R-Banded Karyotyping	Bourthoumieu S, Joubert V, Marin B, Collin A, Leveque P, Terro F, Yardin C	2010-12-01	No Effect	Pulsed	Simulated		Mobile Phone GSM Simulated	https://www.emf-portal.org/en/article/18635	UHF (300 MHz-3 GHz) studies	Fondation sante ́ et radio- fre ́quences’’. http://www.fondationsante.org/index.php?id=sponsors	1	0
1978	Study of p53 expression and post-transcriptional modifications after GSM-900 radiofrequency exposure of human amniotic cells	Bourthoumieu S, Magnaudeix A, Terro F, Leveque P, Collin A, Yardin C.	2013-01-01	No Effect	Pulsed	Simulated		Mobile Phone GSM Simulated	https://www.emf-portal.org/en/article/20967	UHF (300 MHz-3 GHz) studies	Fondation sante ́ et radio- fre ́quences’’. http://www.fondationsante.org/index.php?id=sponsors	1	0
1979	Aneuploidy studies in human cells exposed in vitro to GSM-900 MHz radiofrequency radiation using FISH	Bourthoumieu S, Terro F, Leveque P, Collin A, Joubert V, Yardin C.	2011-04-01	No Effect	Pulsed	Simulated		Mobile Phone GSM Simulated	https://www.ncbi.nlm.nih.gov/pubmed/21247240	UHF (300 MHz-3 GHz) studies	Fondation sante ́ et radio- fre ́quences’’. http://www.fondationsante.org/index.php?id=sponsors	1	0
1980	Reactive oxygen species formation is not enhanced by exposure to UMTS 1950 MHz radiation and co-exposure to ferrous ions in Jurkat cells	Brescia F, Sarti M, Massa R, Calabrese ML, Sannino A, Scarfi MR.	2009-10-01	No Effect	Pulsed			UMTS	https://www.emf-portal.org/en/article/17135	UHF (300 MHz-3 GHz) studies	Centre of Competence on Information and Communication Technologies, Regione Campania, Italy ; Project "Wireless Technology Health Risks", Italy; Italian Agency for Environmental Protection and Technical Services (Agenzia per la Protezione dell'Ambiente e per i servizi Tecnici, APAT, ISPRA institute), Italy; Project "Electromagnetic Fields and Experimental Carcinogenesis", Italy	1	0
1981	Radiofrequency radiation (900 MHz) induces Egr-1 gene expression and affects cell-cycle control in human neuroblastoma cell	Buttiglione M, Roca L, Montemurno E, Vitiello F, Capozzi V, Cibelli G.	2007-12-01	Effect	Pulsed	Simulated		Mobile Phone GSM Simulated	https://www.emf-portal.org/en/article/15008	UHF (300 MHz-3 GHz) studies	MIUR-PRIN. Fondazione Caripuglia—Progetto Uomo e Salute. Fondi Ateneo’’ University of Foggia ‘‘Fondi Ateneo’’ University of Bari.	1	0
1983	Inspections of mobile phone microwaves effects on proteins secondary structure by means of Fourier transform infrared spectroscopy	Calabro E, Magazu S.	2010-11-01	Effect	Pulsed	Simulated		Mobile Phone GSM Simulated	http://www.scirp.org/journal/PaperInformation.aspx?PaperID=3294	UHF (300 MHz-3 GHz) studies	Not Stated	1	0
1984	Modulation of heat shock protein response in SH-SY5Y by mobile phone microwaves	Calabro E, Condello S, Curro M, Ferlazzo N, Caccamo D, Magazu S, Ientile R.	2012-02-01	Effect	Pulsed	Simulated		Mobile Phone GSM Simulated	https://www.emf-portal.org/de/article/20318	UHF (300 MHz-3 GHz) studies	Not Stated	1	0
1985	Apoptosis of human lung carcinoma cell line GLC-82 induced by high power electromagnetic pulse	Cao XZ, Zhao ML, Wang DW, Dong B.	2002-09-01	Effect	Pulsed			Microwave	https://www.ncbi.nlm.nih.gov/pubmed/12508535	UHF (300 MHz-3 GHz) studies	Not Known	1	0
1988	1800 MHz radiofrequency (mobile phones, different Global System for Mobile communication modulations) does not affect apoptosis and heat shock protein 70 level in peripheral blood mononuclear cells from young and old donors	Capri M, Scarcella E, Bianchi E, Fumelli C, Mesirca P, Agostini C, Remondini D, Schuderer J, Kuster N, Franceschi C, Bersani F.	2004-06-01	No Effect	Pulsed	Simulated		Mobile Phone GSM Simulated	https://www.emf-portal.org/en/article/11157	UHF (300 MHz-3 GHz) studies	European Union (EU)/European Commission ; Fondazione del Monte di Bologna e Ravenna, Italy	1	0
1989	In vitro exposure of human lymphocytes to 900 MHz CW and GSM modulated radiofrequency: studies of proliferation, apoptosis and mitochondrial membrane potential	Capri M, Scarcella E, Fumelli C, Bianchi E, Salvioli S, Mesirca P, Agostini C, Antolini A, Schiavoni A, Castellani G, Bersani F, Franceschi C	2004-08-01	Uncertain Effect	Pulsed	Simulated		Mobile Phone GSM Simulated	https://www.emf-portal.org/en/article/11293	UHF (300 MHz-3 GHz) studies	Telecom Italia Mobile (TIM)	1	0
1991	Effect of high-frequency electromagnetic fields on trophoblastic	Cervellati F, Franceschetti G, Lunghi L, Franzellitti S, Valbonesi P, Fabbri E, Biondi C, Vesce F	2009-07-01	Effect	Pulsed	Simulated		Mobile Phone GSM Simulated	https://www.emf-portal.org/en/article/17161	UHF (300 MHz-3 GHz) studies	Fondazione Cassa di Risparmio di Cento, Italy; University of Ferrara, Italy	1	0
1993	Genotoxicity evaluation of electromagnetic fields generated by 835-MHz mobile phone frequency band	Chang SK, Choi JS, Gil HW, Yang JO, Lee EY, Jeon YS, Lee ZW, Lee M, Hong MY, Ho Son T, Hong SY.	2005-05-01	No Effect	Pulsed	Simulated		Mobile Phone CDMA Simulated	https://www.ncbi.nlm.nih.gov/pubmed/15785322	UHF (300 MHz-3 GHz) studies	Korea Science and Engineering Foundation through the BIT Wireless Communication Devices Research Centre, Soonchunhyang University	1	0
1994	Gene expression analysis of a human lymphoblastoma cell line exposed in vitro to an intermittent 1.9 GHz pulse-modulated radiofrequency field	Chauhan V, Mariampillai A, Bellier PV, Qutob SS, Gajda GB, Lemay E, Thansandote A, McNamee, JP.	2006-04-01	No Effect	Pulsed			Microwave	http://pinnacle.allenpress.com/doi/abs/10.1667/RR3531.1?journalCode=rare	UHF (300 MHz-3 GHz) studies	Health Canada Genomics R & D fund	1	0
1995	Analysis of proto-oncogene and heat-shock protein gene expression in human derived cell-lines exposed in vitro to an intermittent 1.9 GHz pulse-modulated radiofrequency field	Chauhan V, Mariampillai A, Gajda GB, Thansandote A, McNamee JP.	2006-05-01	No Effect	Pulsed			Microwave	https://www.emf-portal.org/en/article/13925	UHF (300 MHz-3 GHz) studies	Health Canada Genomics R & D fund	1	0
1996	Evaluating the biological effects of intermittent 1.9 GHz pulse-modulated radiofrequency fields in a series of human-derived cell lines	Chauhan V, Mariampillai A, Kutzner BC, Wilkins RC, Ferrarotto C, Bellier PV, Marro L, Gajda GB, Lemay E, Thansandote A, McNamee JP.	2007-01-01	No Effect	Pulsed			Microwave	https://www.emf-portal.org/en/article/14452	UHF (300 MHz-3 GHz) studies	Health Canada	1	0
1997	Analysis of gene expression in two human-derived cell lines exposed in vitro to a 1.9 GHz pulse-modulated radiofrequency field	Chauhan V, Mariampillai A, Bellier PV, Qutob SS, Gajda GB, Lemay E, Thansandote A, McNamee JP.	2006-04-01	No Effect	Pulsed	Simulated		Mobile Phone GSM Simulated	https://www.emf-portal.org/en/article/13723	UHF (300 MHz-3 GHz) studies	Health Canada Genomics R&D Initiative.	1	0
2004	Effects of mobile phone type signals on calcium levels within human leukaemic T-cells (Jurkat cells)	Cranfield CG, Wood AW, Anderson V, Menezes KG.	2001-12-01	No Effect	Pulsed	Simulated		Mobile Phone GSM Simulated	https://www.ncbi.nlm.nih.gov/pubmed/11747545	UHF (300 MHz-3 GHz) studies	Swinburne University Research and Development Fund and a Telstra Fellowship	1	0
2008	Evidence for a specific microwave radiation effect on the green fluorescent	Copty AB, Y Neve-Oz Y , Barak I, Golosovsky M, and Davidov D.	2006-08-01	Effect	Continuous			Microwave Heating Device OvenMicrowave Heating Device	https://www.ncbi.nlm.nih.gov/pmc/articles/PMC1518661/	UHF (300 MHz-3 GHz) studies	Israeli Ministry of Science and the Deutschen Forschungs- gemeinschaft	1	0
2009	Preliminary evaluation of nanoscale biogenic magnetite-based ferromagnetic transduction mechanisms for mobile phone bioeffects	Cranfield C, Wieser, H. G., Madan JA.	2003-04-01	Effect	Pulsed	Real		Mobile Phone	http://ieeexplore.ieee.org/abstract/document/1198677/	UHF (300 MHz-3 GHz) studies	Not Stated	1	0
2011	Exposure of magnetic bacteria to simulated mobile phone-type RF radiation has no impact on mortality	Cranfield CG, Wieser HG, Dobson J.	2003-09-01	No Effect	Pulsed	Simulated		Mobile Phone CDMA Simulated	https://www.ncbi.nlm.nih.gov/pubmed/15376948	UHF (300 MHz-3 GHz) studies	Swiss Research Foundation on Mobile Communication, Zurich, Switzerland	1	0
2012	High frequency electromagnetic fields (GSM signals) affect gene expression levels in tumor suppressor p53-deficient embryonic stem cells	Czyz J, Guan K, Zeng Q, Nikolova T, Meister A, Schönborn F, Schuderer J, Kuster N, Wobus AM.	2004-05-01	Effect	Pulsed	Simulated		Mobile Phone GSM Simulated	https://www.ncbi.nlm.nih.gov/pubmed/15114639	UHF (300 MHz-3 GHz) studies	VERUM Foundation, Munich under EU project (REFLEX); Grant sponsor: Fonds der Chemischen Industrie (FCI) FRG.	1	0
2014	Immunotropic effects in cultured human blood mononuclear cells pre-exposed to low-level 1300 MHz pulse-modulated microwave field	Dabrowski, MP, Stankiewicz W, Kubacki R, Sobiczewska E, Smigielski S.	2003-04-29	Effect	Pulsed			Microwave	https://www.emf-portal.org/en/article/10033	UHF (300 MHz-3 GHz) studies	Not Stated	1	0
2015	Cytogenetic damage in human lymphocytes following GMSK phase modulated microwave exposure	d'Ambrosio G, Massa R, Scarfi MR, Zeni O.	2001-12-18	Effect	Pulsed	Simulated		Mobile Phone GSM Simulated	https://www.ncbi.nlm.nih.gov/pubmed/11793401?dopt=Abstract	UHF (300 MHz-3 GHz) studies	Not Stated	1	0
2017	Effect of Exposure to the Edge Signal on Oxidative Stress in Brain Cell Models	de Gannes FP, Haro E, Hurtier A, Taxile M, Ruffie G, Billaudel B, Veyret B, Lagroye I	2011-02-01	No Effect	Pulsed	Simulated		Mobile Phone GSM Simulated	https://www.emf-portal.org/en/article/18782	UHF (300 MHz-3 GHz) studies	Bouygues Telecom, France; Centre National de la Recherche Scientifique (CNRS; French National Center for Scientific Research), France ; École Pratique des Hautes Etudes, France	1	0
2018	Effect of radiofrequency electromagnetic field exposure on in vitro models of neurodegenerative disease	Del Vecchio G, Giuliani A, Fernandez M, Mesirca P, Bersani F, Pinto R, Ardoino L, Lovisolo GA, Giardino L, Calza L.	2009-10-01	Effect	Pulsed	Simulated		Mobile Phone GSM Simulated	https://www.emf-portal.org/en/article/17143	UHF (300 MHz-3 GHz) studies	European Union (EU)/European Commission; Ministry of University and Research), Italy Fondazione del Monte di Bologna e Ravenna, Italy ; European Project RAMP ("Risk Assessment for Exposure of Nervous System Cells to Mobile Telephone EMF: from in Vitro to in Vivo Studies") Lion's Club, Italy; University of Bologna, Italy	1	0
2019	Continuous exposure to 900MHz GSM-modulated EMF alters morphological maturation of neural cells	Del Vecchio G, Giuliani A, Fernandez M, Mesirca P, Bersani F, Pinto R, Ardoino L, Lovisolo GA, Giardino L, Calza L	2009-05-01	Effect	Pulsed	Simulated		Mobile Phone GSM Simulated	https://www.emf-portal.org/en/article/17080	UHF (300 MHz-3 GHz) studies	European Union (EU)/European Commission; Ministry of University and Research), Italy Fondazione del Monte di Bologna e Ravenna, Italy ; European Project RAMP ("Risk Assessment for Exposure of Nervous System Cells to Mobile Telephone EMF: from in Vitro to in Vivo Studies") Lion's Club, Italy; University of Bologna, Italy	1	0
2020	Non-thermal exposure to radiofrequency energy from digital wireless phones does not affect ornithine decarboxylase activity in L929 cells	Desta AB, Owen RD, Cress LW.	2003-10-01	No Effect	Pulsed			Mobile Phone TDMA Time Division Multiple Access	https://www.emf-portal.org/en/article/11208	UHF (300 MHz-3 GHz) studies	Not Stated	1	0
2022	Comparison of Hsps expression after radio-frequency field exposure in three human glioma cell lines	Ding GR, Wang XW, Li KC, Qiu LB, Xu SL, Tan J, Guo GZ	2009-10-01	Effect	Continuous	Simulated		Mobile Phone W-CDMA Simulated	https://www.emf-portal.org/en/article/17975	UHF (300 MHz-3 GHz) studies	Not Stated	1	0
2026	In Vitro Evaluation of Biological Effects on Human Keratinocytes Exposed to 900 MHz Electromagnetic Field	Duranti, G, Rossi A, Rosato N, Fazio G, Sacerdoti G, Rossi P, Falsaperla R, Cannelli V, Supino R	2005-12-01	Effect	Sinusoidal			Transverse Electromagnetic (TEM) Cell	http://link.springer.com/article/10.1007/s10669-005-4273-y	UHF (300 MHz-3 GHz) studies	National Institute of Occupational Safety and Preven- tion (ISPESL - Italy)	1	0
2028	Is gene activity in plant cells affected by UMTS-irradiation? A whole genome	Engelmann JC, Deeken R, Müller T, Nimtz G, Roelfsema MRG, Hedrich R.	2008-01-01	Effect	Continuous	Simulated		Mobile Phone W-CDMA Simulated	https://www.emf-portal.org/en/article/16545	UHF (300 MHz-3 GHz) studies	Swisscom ; E-Plus Company, Germany; Bundesministerium für Bildung und Forschung (BMBF; Federal Ministry for Education and Research), German, BMBF project FUNCRYPTA ("Funktionelle Analyse dynamischer Prozesse in cryptobiotischen Tardigraden"), Germany State of Bavaria (IZKF), Germany	1	0
2031	Effects of electromagnetic radiation from a cellular phone on human sperm motility: an in vitro study	Erogul O, Oztas E, Yildirim I, Kir T, Aydur E, Komesli G, Irkilata HC, Irmak MK, Peker AF.	2006-10-01	Effect	Pulsed	Real		Mobile Phone GSM	https://www.emf-portal.org/en/article/14172	UHF (300 MHz-3 GHz) studies	Not Stated	1	0
2032	In vitro effect of pulsed 900 MHz GSM radiation on mitochondrial membrane potential and motility of human spermatozoa	Falzone N, Huyser C, Fourie F, Toivo T, Leszczynski D, Franken D.	2008-05-01	Effect	Pulsed	Simulated		Mobile Phone GSM Simulated	https://www.ncbi.nlm.nih.gov/pubmed/18163440	UHF (300 MHz-3 GHz) studies	Grant sponsor: National Research Foundation (NRF), Pretoria, South Africa; Grant number: 2054206; Grant sponsors: NRF Mobility Fund; South African Bureau of Standards (SABS); Internal Funds of STUK (Helsinki, Finland)	1	0
2033	The effect of pulsed 900-MHz GSM mobile phone radiation on the acrosome reaction, head morphometry and zona binding of human spermatozoa	Falzone N, Huyser C, Becker P, Leszczynski D, Franken DR.	2011-02-01	Effect	Pulsed	Simulated		Mobile Phone GSM Simulated	https://www.emf-portal.org/en/article/18046	UHF (300 MHz-3 GHz) studies	National Research Foundation (NRF), Pretoria, South Africa & South African Bureau of Standards (SABS)	1	0
2034	Mobile phone radiation does not induce pro-apoptosis effects in human spermatozoa	Falzone N, Huyser C, Franken DR, Leszczynski D.	2010-08-01	No Effect	Pulsed	Simulated		Mobile Phone GSM Simulated	https://www.emf-portal.org/en/article/18217	UHF (300 MHz-3 GHz) studies	STUK (Radiation and Nuclear Safety Authority), Helsinki, Finland; National Research Foundation (NRF), Pretoria, South Africa; South African Bureau of Standards (SABS)	1	0
2036	Influence of microwave heating on fluoride, chloride, nitrate and sulfate concentrations in water	Figueiredo EC, Dias JC, Kubota LT, Korn M, Oliveira PV, Arruda MA.	2011-10-15	Effect	Continuous			Microwave Oven	https://www.ncbi.nlm.nih.gov/pubmed/21962707	UHF (300 MHz-3 GHz) studies	the Financiadora de Estudos e Projetos (FINEP, Brazil) for financial support and fellowships	1	0
2037	Radio frequency radiation causes no nonthermal damage in enzymes and living cells	Fortune JA, Wu BI, Klibanov AM.	2010-11-01	No Effect	Continuous			RF Signal Generator	https://www.emf-portal.org/en/article/18379	UHF (300 MHz-3 GHz) studies	MIT Healthcare Research Initiative Consortium, USA; Roche; Sanofi-Aventis ; Wyeth	1	0
2038	Electromagnetic fields (GSM 1800) do not alter blood-brain barrier permeability to sucrose in models in vitro with high barrier tightness	Franke H, Ringelstein EB, Stogbauer F.	2005-10-01	No Effect	Pulsed	Simulated		Mobile Phone GSM Simulated	https://www.emf-portal.org/en/article/12436	UHF (300 MHz-3 GHz) studies	Research Association for Radio Applications, Germany	1	0
2040	Transient DNA damage induced by high-frequency electromagnetic fields (GSM 1.8 GHz) in the human trophoblast HTR-8/SVneo cell line evaluated with the alkaline comet assay	Franzellitti S, Valbonesi P, Ciancaglini N, Biondi C, Contin A, Bersani F, Fabbri E.	2010-01-05	Effect	Continuous			RF Signal Generator	https://www.emf-portal.org/en/article/17612	UHF (300 MHz-3 GHz) studies	Funds for the purchase of the HF-EMF exposure system were provided by the Fondazione Flaminia (Ravenna) and funding for the research was granted by the Italian Ministry of University and Scientific Research (PRIN 2005).	1	0
2041	HSP70 expression in human trophoblast cells exposed to different 1.8 Ghz mobile phone signals	Franzellitti S, Valbonesi P, Contin A, Biondi C, Fabbri E.	2008-10-01	Effect	Continuous	Simulated		Mobile Phone TDMA Simulated	https://www.emf-portal.org/en/article/16440	UHF (300 MHz-3 GHz) studies	Ministry of Education, University and Research, Italy	1	0
2042	Effect of microwave radiation on the biophysical properties of liposomes	Gaber MH, Abd El Halim N, Khalil WA.	2005-04-01	Effect	Pulsed	Simulated		Mobile Phone GSM Simulated	www.emf-portal.org/en/article/11715	UHF (300 MHz-3 GHz) studies	Not Stated	1	0
2043	Radioprotective effects of honeybee venom (Apis mellifera) against 915-MHz microwave radiation-induced DNA damage in wistar rat lymphocytes: in vitro study	Gajski G, Garaj-Vrhovac V.	2009-03-01	Effect	Pulsed	Simulated	1	Mobile Phone GSM Simulated and Gigahertz Transversal Electromagnetic Mode (GTEM) Cell	https://www.emf-portal.org/en/article/17452	UHF (300 MHz-3 GHz) studies	Ministry of Science, Education and Sports, Republic of Croatia	1	0
2044	Non-thermal effects in the microwave induced unfolding of proteins observed by chaperone binding	George DF, Bilek MM, McKenzie DR.	2008-05-01	Effect	Pulsed			Microwave Oven	https://www.emf-portal.org/en/article/15626	UHF (300 MHz-3 GHz) studies	Australian Research Council	1	0
2045	Increased protein synthesis by cells exposed to a 1,800-MHz radio-frequency mobile phone electromagnetic field, detected by proteome profiling	Gerner C, Haudek V, Schandl U, Bayer E, Gundacker N, Hutter HP, Mosgoeller W.	2010-08-01	Effect	Pulsed	Simulated		Mobile Phone GSM Simulated	https://www.emf-portal.org/en/article/17958	UHF (300 MHz-3 GHz) studies	Austrian Workers' Compensation Board (AUVA), Vienna, Austria	1	0
2046	No mutagenic or recombinogenic effects of mobile phone fields at 900 MHz detected in the yeast Saccharomyces cerevisiae	Gos P, Eicher B, Kohli J, Heyer WD.	2000-10-01	No Effect	Pulsed	Simulated		Mobile Phone GSM Simulated	https://www.emf-portal.org/en/article/3935	UHF (300 MHz-3 GHz) studies	Swisscom & Deutsche Telekom/T-Systems, Germany	1	0
2047	An investigation of the effects of TETRA RF fields on intracellular calcium in neurones and cardiac myocytes	Green AC, Scott IR, Gwyther RJ, Peyman A, Chadwick P, Chen X, Alfadhl Y, Tattersall JE.	2005-12-01	Uncertain Effect	Pulsed	Simulated		TETRA simulated	https://www.ncbi.nlm.nih.gov/pubmed/16524843	UHF (300 MHz-3 GHz) studies	Home Office (Police Information and Technology Organisation)	1	0
2048	Biological effects of mobile phone electromagnetic field on chick embryo (risk assessment using the mortality rate	Grigoriev YG.	2003-09-01	Effect	Pulsed	Real		Mobile Phone GSM	https://www.ncbi.nlm.nih.gov/pubmed/14658287	UHF (300 MHz-3 GHz) studies	Not Known	1	0
2049	An in vitro study of the effects of exposure to a GSM signal in two human cell lines: monocytic U937 and neuroblastoma SK-N-SH	Gurisik E, Warton K, Martin DK, Valenzuela SM.	2006-10-01	No Effect	Pulsed	Simulated		Mobile Phone GSM Simulated	https://www.ncbi.nlm.nih.gov/pubmed/16877012	UHF (300 MHz-3 GHz) studies	Key University Research Centre in Health Technologies, University of Technology Sydney, Australia. Telstra Research Laboratories, Clayton, Victoria, Australia, supplied, calibrated and characterised the RF exposure equipment used for SAR dosimetry.	1	0
2051	Cytogenetic effects of exposure to 2.3 GHz radiofrequency radiation on human lymphocytes in vitro	Hansteen IL, Clausen KO, Haugan V, Svendsen M, Svendsen MV, Eriksen JG, Skiaker R, Hauger E, Lågeide L, Vistnes AI, Kure EH.	2009-11-01	Uncertain Effect	Pulsed			Microwave	https://www.ncbi.nlm.nih.gov/pubmed/20032374	UHF (300 MHz-3 GHz) studies	Not Stated	1	0
2053	STAT3 signalling pathway is involved in the activation of microglia induced by 2.45 GHz electromagnetic fields	Hao Y, Yang X, Chen C, Yuan-Wang, Wang X, Li M, Yu Z.	2010-01-13	Effect	Pulsed			RF Signal Generator	https://www.emf-portal.org/en/article/17876	UHF (300 MHz-3 GHz) studies	National Natural Science Foundation of China	1	0
2054	Effects on protein kinase C and gene expression in a human mast cell line, HMC-1, following microwave exposure	Harvey C, French PW.	2000-01-01	Effect	Continuous			Microwave	https://www.emf-portal.org/en/article/4178	UHF (300 MHz-3 GHz) studies	New South Wales health research and development infrastructure grant, Australia & University of New South Wales (UNSW) School of Medicine project grant, Australia	1	0
2058	Radiofrequency electromagnetic fields do not alter the cell cycle progression of C3H 10T and U87MG cells	Higashikubo R, Ragouzis M, Moros EG, Straube WL, Roti Roti JL.	2001-12-01	No Effect	Pulsed	Simulated		Mobile Phone CDMA Simulated	https://www.emf-portal.org/en/article/7988	UHF (300 MHz-3 GHz) studies	Motorola	1	0
2059	900 MHz radiation does not induce micronucleus formation in different cell types	Hintzsche H, Jastrow C, Kleine-Ostmann T, Schrader T, Stopper H.	2012-07-01	No Effect	Continuous			RF Signal Generator	https://www.ncbi.nlm.nih.gov/pubmed/22416057	UHF (300 MHz-3 GHz) studies	Not stated	1	0
2060	Mobile phone base station-emitted radiation does not induce phosphorylation of Hsp27	Hirose H, Sakuma N, Kaji N, Nakayama K, Inoue K, Sekijima M, Nojima T, Miyakoshi J.	2007-02-01	No Effect	Pulsed	Simulated		Mobile Phone W-CDMA Simulated	https://www.emf-portal.org/en/article/14217	UHF (300 MHz-3 GHz) studies	NTT DoCoMo, Japan	1	0
2061	Phosphorylation and gene expression of p53 are not affected in human cells exposed to 2.1425 GHz band CW or W-CDMA modulated radiation allocated to mobile radio base stations	Hirose H, Sakuma N, Kaji N, Suhara T, Sekijima M, Nojima T, Miyakoshi J.	2006-09-01	No Effect	Pulsed	Simulated		Mobile Phone W-CDMA Simulated	https://www.emf-portal.org/en/article/13863	UHF (300 MHz-3 GHz) studies	NTT DoCoMo, Japan	1	0
2063	Mobile phone base station radiation does not affect neoplastic transformation in BALB/3T3 cells	Hirose H, Suhara T, Kaji N, Sakuma N, Sekijima M, Nojima T, Miyakoshi J.	2007-08-10	No Effect	Pulsed	Real		Mobile Phone W-CDMA	https://www.emf-portal.org/en/article/14957	UHF (300 MHz-3 GHz) studies	NTT DoCoMo, Japan	1	0
2065	Measurement of DNA damage and apoptosis in Molt-4 cells after in vitro exposure to radiofrequency radiation	Hook GJ, Zhang P, Lagroye I, Li L, Higashikubo R, Moros EG, Straube WL, Pickard WF, Baty JD, Roti Roti JL	2004-02-01	No Effect	Pulsed	Simulated		Mobile Phone CDMA Simulated	https://www.emf-portal.org/en/article/10635	UHF (300 MHz-3 GHz) studies	Motorola	1	0
2066	Ornithine decarboxylase activity of L929 cells after exposure to continuous wave or 50 Hz modulated radiofrequency radiation--a replication study	Hoyto A, Juutilainen J, Naarala J.	2007-10-01	Uncertain Effect	Continuous	Simulated		Mobile Phone GSM Simulated	https://www.emf-portal.org/en/article/14707	UHF (300 MHz-3 GHz) studies	The Finnish Funding Agency for Technology and Innovation (Tekes); The GSM Association; The Mobile Manu- facturers Forum and Finnish Cultural Foundation, Regional Fund of North-Savo.	1	0
2068	Proliferation, oxidative stress and cell death in cells exposed to 872 MHz radiofrequency radiation and oxidants	Hoyto A, Luukkonen J, Juutilainen J, Naarala J.	2008-08-01	Effect	Pulsed	Simulated		Mobile Phone GSM Simulated	https://www.emf-portal.org/en/article/16193	UHF (300 MHz-3 GHz) studies	Finnish Cultural Foundation of Northern Savo; Finnish Graduate School of Environmental Health (SYTYKE) Finnish mobile phone manufacturers and operators ; Tekes (National Technology Agency), Finland GSM Association, UK/Ireland	1	0
2069	Modest increase in temperature affects ODC activity in L929 cells: Low-level radiofrequency radiation does not	Hoyto A, Sihvonen AP, Alhonen L, Juutilainen J, Naarala J.	2006-07-19	No Effect	Pulsed	Simulated		Mobile Phone GSM Simulated	https://www.emf-portal.org/en/article/14027	UHF (300 MHz-3 GHz) studies	Tekes (National Technology Agency), Finland; GSM Association, UK/Ireland; Mobile Manufacturers Forum (MMF), Belgium	1	0
2070	Radiofrequency radiation does not significantly affect ornithine decarboxylase activity, proliferation, or caspase-3 activity of fibroblasts in different physiological conditions	Hoyto A, Sokura M, Juutilainen J, Naarala J.	2009-07-03	Uncertain Effect	Pulsed	Simulated		Mobile Phone GSM Simulated	https://www.emf-portal.org/en/article/16426	UHF (300 MHz-3 GHz) studies	Finnish Graduate School of Environmental Health (SYTYKE); Tekes (National Technology Agency), Finland GSM Association, UK/Ireland; Mobile Manufacturers Forum (MMF), Belgium; Finnish Work Environment Fund; Jenny and Antti Wihuri Foundation, Finland; Ministry of Education, Finland	1	0
2071	Experimental evidence of a microwave non-thermal effect in electrolyte aqueous solutions	Huang, K., Yang X., Hua W., Jia G., Yang L.	2009-04-01	Effect	Continuous			Microwave Generator	http://pubs.rsc.org/en/Content/ArticleLanding/2009/NJ/b821970b#!divAbstract	UHF (300 MHz-3 GHz) studies	National Science Foundation of China	1	0
2072	Molecular responses of Jurkat T-cells to 1763 MHz radiofrequency radiation	Huang TQ, Lee MS, Oh E, Zhang BT, Seo JS, Park WY.	2009-07-03	Effect	Pulsed	Simulated		Mobile Phone CDMA Simulated	https://www.emf-portal.org/en/article/16424	UHF (300 MHz-3 GHz) studies	Ministry of Education and Human Resources Development, Korea & MKE/IITA (Ministry of Knowledge Economy/Institute for Information Technology Advancement), Korea	1	0
2073	Characterization of biological effect of 1763 MHz radiofrequency exposure on auditory hair cells	Huang TQ, Lee MS, Oh EH, Kalinec F, Zhang BT, Seo JS, Park WY	2009-07-03	Effect	Pulsed	Simulated		Mobile Phone CDMA Simulated	https://www.emf-portal.org/en/article/16546	UHF (300 MHz-3 GHz) studies	Ministry of Education and Human Resources Development, Korea; Program BK21 IT R&D program of MIC/IITA (Ministry of Information and Communication/Institute of Information Technology Assessment), Korea	1	0
2077	The effects of a 1.8 GHz continuous electromagnetic fields on mucociliary transport of human nasal mucosa	In SM, Kim HJ, Park RW, Kim W, Gimm YM, Park I, Hong S, Hong JJ, Oh JH, Kahng H, Park EY.	2012-10-11	Effect	Continuous	Simulated		Mobile Phone GSM Simulated	https://www.emf-portal.org/en/article/21319	UHF (300 MHz-3 GHz) studies	Ministry of Education, Science and Technology (MEST), Korea ; National Research Foundation (NRF) of Korea	1	0
2078	Cell Phone Radiation and Developing Tissues in Chick Embryo - A Light microsopic Study of Kidneys	Ingole, IV, Ghosh SK	2012-12-01	Effect	Continuous			Microwave	https://www.ncbi.nlm.nih.gov/pubmed/24579548	UHF (300 MHz-3 GHz) studies	Not Stated	1	0
2079	Microwave irradiation induces neurite outgrowth in PC12m3 cells via the p38 mitogen-activated protein kinase pathway	Inoue S, Motoda H, Koike Y, Kawamura K, Hiragami F, Kano Y.	2008-02-13	Effect	Continuous			Microwave	https://www.emf-portal.org/en/article/15527	UHF (300 MHz-3 GHz) studies	Not Stated	1	0
2081	Effect of short-term exposure to radio frequency emitted by base transceiver station (BTS) antenna on epididymal sperms	Jelodar G,Talebzadeh MR, Lari MA.	2011-07-16	Effect	Continuous			RF Signal Generator	http://link.springer.com/article/10.1007/s00580-011-1282-8	UHF (300 MHz-3 GHz) studies	Not Stated	1	0
2083	Apoptosis is induced by radiofrequency fields through the caspase-independent mitochondrial pathway in cortical neurons	Joubert V, Bourthoumieu S, Leveque P, Yardin C.	2008-01-01	Effect	Continuous	Simulated		Mobile Phone GSM Simulated	http://www.rrjournal.org/doi/abs/10.1667/RR1077.1?code=rrs-site	UHF (300 MHz-3 GHz) studies	Conseil Regional du Lim- ousin and the University of Limoges.	1	0
2084	No apoptosis is induced in rat cortical neurons exposed to GSM phone fields	Joubert V, Leveque P, Cueille M, Bourthoumieu S, Yardin C.	2006-09-26	No Effect	Pulsed	Simulated		Mobile Phone GSM Simulated	https://www.emf-portal.org/en/article/14214	UHF (300 MHz-3 GHz) studies	Conseil Régional du Limousin, France & University of Limoges, France	1	0
2085	Microwave exposure of neuronal cells in vitro: Study of apoptosis	Joubert V, Leveque P, Rametti A, Collin A, Bourthoumieu S, Yardin C.	2009-07-03	No Effect	Pulsed	Simulated		Mobile Phone GSM Simulated	https://www.ncbi.nlm.nih.gov/pubmed/16690594	UHF (300 MHz-3 GHz) studies	Conseil Regional du Limousin and the University of Limoges.	1	0
2087	No significant Cytogenetic Effects in Cultured Human Lymphocytes Exposed to Cell Phones Radiofrequencies (900MHz and 1800MHz)	Khalil A, Alshamali A.	2010-01-01	Uncertain Effect	Pulsed	Simulated		Mobile Phone GSM Simulated	https://www.researchgate.net/publication/267969383_No_significant_Cytogenetic_Effects_in_Cultured_Human_Lymphocytes_Exposed_to_Cell_Phones_Radiofrequencies_900MHz_and_1800MHz	UHF (300 MHz-3 GHz) studies	Deanship of Research and Graduate Studies at Yarmouk University, Irbid, Jordan,	1	0
2088	Analysis of the Cellular Stress Response in MCF10A Cells Exposed to Combined Radio Frequency Radiation	Kim HN, Han NK, Hong MN, Chi SG, Lee YS, Kim T, Pack JK, Choi HD, Kim N, Lee JS.	2012-03-01	No Effect	Pulsed	Simulated		Mobile Phone CDMA Simulated	https://www.emf-portal.org/en/article/20543	UHF (300 MHz-3 GHz) studies	Korea Communications Commission (KCC), Korea	1	0
2089	Two-dimensional electrophoretic analysis of radio frequency radiation-exposed MCF7 breast cancer cells	Kim KB, Byun HO, Han NK, Ko YG, Choi HD, Kim N, Pack JK, Lee JS.	2009-11-20	No Effect	Continuous			Microwave	https://www.ncbi.nlm.nih.gov/pubmed/20339255	UHF (300 MHz-3 GHz) studies	Korea Communications Commission	1	0
2091	Effect of high-frequency electromagnetic fields with a wide range of SARs on chromosomal aberrations in murine m5S cells	Komatsubara Y, Hirose H, Sakurai T, Koyama S, Suzuki Y, Taki M, Miyakoshi J.	2005-11-10	No Effect	Continuous			Microwave	https://www.emf-portal.org/en/article/12641	UHF (300 MHz-3 GHz) studies	Ministry of Internal Affairs and Communications, Japan	1	0
2093	Absence of nonlinear responses in cells and tissues exposed to RF energy at mobile phone frequencies using a doubly resonant cavity	Kowalczuk C, Yarwood G, Blackwell R, Priestner M, Sienkiewicz Z, Bouffler S, Ahmed I, Abd-Alhameed R, Excell P, Hodzic V, Davis C, Gammon R, Balzano Q.	2010-07-06	No Effect	Continuous			Transverse Electromagnetic (TEM) Cell	https://www.ncbi.nlm.nih.gov/pubmed/20607742	UHF (300 MHz-3 GHz) studies	UK Mobile Telecommunications and Health Research Programme.	1	0
2094	Effects of 2.45-GHz electromagnetic fields with a wide range of SARs on micronucleus formation in CHO-K1 cells	Koyama S, Isozumi Y, Suzuki Y, Taki M, Miyakoshi J.	2004-10-20	Effect	Continuous			RF Signal Generator and Electromagnetic (TEM) Cell	https://www.ncbi.nlm.nih.gov/pubmed/15517100	UHF (300 MHz-3 GHz) studies	Ministry of Internal Affairs and Communications.	1	0
2095	Effects of high frequency electromagnetic fields on micronucleus formation in CHO-K1 cells	Koyama S, Nakahara T, Wake K, Taki M, Isozumi Y, Miyakoshi J.	2003-11-10	Effect	Continuous			RF Signal Generator	https://www.ncbi.nlm.nih.gov/pubmed/14568297	UHF (300 MHz-3 GHz) studies	Grant-in-Aid from the Research for the Future Program of the Japan Society for the Promotion of Science.	1	0
2096	Effects of 2.45 GHz electromagnetic fields with a wide range of SARs on bacterial and HPRT gene mutations	Koyama S, Takashima Y, Sakurai T, Suzuki Y, Taki M, Miyakoshi J.	2007-01-01	Effect	Continuous			Transverse Electromagnetic (TEM) Cell	https://www.ncbi.nlm.nih.gov/pubmed/17179647	UHF (300 MHz-3 GHz) studies	Ministry of Internal Affairs and Communications.	1	0
2098	Effect of electromagnetic field on endocytosis of cationic solid lipid nanoparticles by human brain-microvascular endothelial cells	Kuo YC, Chen HH.	2010-06-07	Effect	Amplitude Modulation			Microwave	https://www.ncbi.nlm.nih.gov/pubmed/20528098	UHF (300 MHz-3 GHz) studies	National Science Council of the Republic of China.	1	0
2099	Changes in cellular Proteins due to environmental non-ionizing radiation. I. Heat Shock proteins	Kwee, S.; Raskmar, P. and Velizarov,S.	2001-06-30	Effect	Pulsed	Simulated		Mobile Phone GSM Simulated	http://www.tandfonline.com/doi/abs/10.1081/JBC-100104139	UHF (300 MHz-3 GHz) studies	Not Stated	1	0
2100	Measurements of alkali-labile DNA damage and protein-DNA crosslinks after 2450 MHz microwave and low-dose gamma irradiation in vitro	Lagroye I, Hook GJ, Wettring BA, Baty JD, Moros EG, Straube WL, Roti Roti JL.	2004-02-01	No Effect	Continuous			RF Signal Generator	https://www.ncbi.nlm.nih.gov/pubmed/14731069	UHF (300 MHz-3 GHz) studies	Motorola Corporation.	1	0
2101	Comparative study of cell cycle kinetics and induction of apoptosis or necrosis after exposure of human mono mac 6 cells to radiofrequency radiation	Lantow M, Viergutz T, Weiss DG, Simko M	2006-09-01	No Effect	Pulsed	Simulated		Mobile Phone GSM Simulated	https://www.emf-portal.org/en/article/14136	UHF (300 MHz-3 GHz) studies	Federal Office for Radiation Protection Salzgitter, Germany; DMF; German Mobile Phone Research Programme at Federal Office for Radiation Protection	1	0
2102	The heat-shock factor is not activated in mammalian cells exposed to cellular phone frequency microwaves	Laszlo A, Moros EG, Davidson T, Bradbury M, Straube W, Roti Roti J.	2005-08-01	No Effect	Pulsed	Simulated		Mobile Phone FDMA Simulated	https://www.ncbi.nlm.nih.gov/pubmed/16038587	UHF (300 MHz-3 GHz) studies	Motorola Corporation	1	0
2104	Acute radio frequency irradiation does not affect cell cycle, cellular migration, and invasion	Lee JJ, Kwak HJ, Lee YM, Lee JW, Park MJ, Ko YG, Choi HD, Kim N, Pack JK, Hong SI, Lee JS.	2008-05-30	No Effect	Pulsed	Real		Mobile Phone CDMA	https://www.emf-portal.org/en/article/16005	UHF (300 MHz-3 GHz) studies	Ministry of Information and Communication, Korea	1	0
2105	Radiofrequency radiation does not induce stress response in human T-lymphocytes and rat primary astrocytes	Lee JS, Huang TQ, Kim TH, Kim JY, Kim HJ, Pack JK, Seo JS.	2006-07-12	No Effect	Pulsed	Real		Mobile Phone CDMA	https://www.emf-portal.org/en/article/13997	UHF (300 MHz-3 GHz) studies	Ministry of Information and Communication, Korea	1	0
2106	Effects of combined radiofrequency radiation exposure on the cell cycle and its regulatory proteins	Lee JS, Kim JY, Kim HJ, Kim JC, Lee JaS, Kim N, Park MJ.	2016-11-01	No Effect	Pulsed	Real		Mobile Phone CDMA	https://www.emf-portal.org/en/article/29719	UHF (300 MHz-3 GHz) studies	Ministry of Science, ICT and Future Planning/Institute for Information & Communications Technology Promotion Korea; Ministry of Science, ICT and Future Planning (MSIP), Korea; Korea Institute of Radiological & Medical Sciences, Korea; National R&D Program, Korea	1	0
2108	2.45 GHz radiofrequency fields alter gene expression in cultured human cells	Lee S, Johnson D, Dunbar K, Dong H, Ge X, Kim YC, Wing C, Jayathilaka N, Emmanuel N, Zhou CQ, Gerber HL, Tseng CC, Wang SM.	2005-08-09	Effect	Pulsed			Transcranial Magnetic Stimulation	https://www.ncbi.nlm.nih.gov/pubmed/16107253	UHF (300 MHz-3 GHz) studies	Department of Defence, Air Force Office of Scientific Research	1	0
2109	Non-thermal activation of the hsp27/p38MAPK stress pathway by mobile phone radiation in human endothelial cells: molecular mechanism for cancer- and blood-brain barrier-related effects	Leszczynski D, Joenvaara S, Reivinen J, Kuokka R.	2002-05-01	Effect	Pulsed	Simulated		Mobile Phone GSM Simulated	https://www.emf-portal.org/en/article/8800	UHF (300 MHz-3 GHz) studies	European Union (EU)/European Commission; Tekes (National Technology Agency), Finland	1	0
2111	Proteomic analysis of human lens epithelial cells exposed to microwaves	Li HW, Yao K, Jin HY, Sun LX, Lu DQ, Yu YB.	2007-12-21	Effect	Pulsed	Simulated		Mobile Phone GSM Simulated	https://www.emf-portal.org/en/article/15513	UHF (300 MHz-3 GHz) studies	Chinese National Science Foundation	1	0
2114	Effect of 900 MHz electromagnetic fields on nonthermal induction of heat-shock proteins in human leukocytes	Lim HB, Cook GG, Barker AT, Coulton LA.	2005-01-01	No Effect	Pulsed	Simulated		Mobile Phone GSM Simulated	https://www.emf-portal.org/en/article/11511	UHF (300 MHz-3 GHz) studies	Medical Research Council, UK	1	0
2115	Potential Protection of Green Tea Polyphenols Against 1800 MHz Electromagnetic Radiation-Induced Injury on Rat Cortical Neurons	Liu ML, Wen JQ, Fan YB.	2011-02-04	Effect	Pulsed	Real		Mobile Phone GSM	https://www.emf-portal.org/en/article/18995	UHF (300 MHz-3 GHz) studies	National Natural Science Foundation (NSFC), China ; Research Fund for the Doctoral Program of Higher Education, China	1	0
2117	The induction of Epstein-Barr Virus early antigen expression in Raji Cells by GSM mobile phone radiation	Liu Y, Wang ML, Zhong RG, Ma XM, Wang Q, Zeng Y	2013-01-01	Effect	Pulsed	Real		Mobile Phone GSM	https://www.emf-portal.org/en/article/21619	UHF (300 MHz-3 GHz) studies	Fundamental Research Fund for the Beijing Municipal Education Commission Science and Technology Innovation Platform, China ; National Key Basic Research Project, China	1	0
2118	Exposure to 1950-MHz TD-SCDMA Electromagnetic Fields Affects the Apoptosis of Astrocytes via Caspase-3-Dependent Pathway	Liu YX, Tai JL, Li GQ, Zhang ZW, Xue JH, Liu HS, Zhu H, Cheng JD, Liu YL, Li AM, Zhang Y.	2012-08-01	Effect	Pulsed	Simulated		Mobile Phone TD-SCDMA Simulated	https://www.emf-portal.org/en/article/21076	UHF (300 MHz-3 GHz) studies	National Basic Research Program of China	1	0
2119	Effects of 1.8 GHz radiofrequency field on DNA damage and expression of heat shock protein 70 in human lens epithelial cells	Lixia S, Yao K, Kaijun W, Deqiang L, Huajun H, Xiangwei G, Baohong W, Wei Z, Jianling L, Wei W.	2006-12-01	Effect	Pulsed	Simulated		Mobile Phone GSM Simulated	https://www.ncbi.nlm.nih.gov/pubmed/17011595	UHF (300 MHz-3 GHz) studies	Natural Science Foundation of Zhejiang Province	1	0
2121	In vitro effects of radiofrequency electromagnetic waves on bovine spermatozoa	Lukac N, Massanyi P, Roychoudhury S, Capcarova M, Tvrda E, Knazicka Z, Kolesarova A, Danko J.	2011-09-23	Effect	Pulsed	Simulated		Mobile Phone GSM Simulated	https://www.emf-portal.org/en/article/19704	UHF (300 MHz-3 GHz) studies	Ministry of Education, Slovakia	1	0
2122	Combined effects of 872 MHz radiofrequency radiation and ferrous chloride on reactive oxygen species production and DNA damage in human SH-SY5Y neuroblastoma cells	Luukkonen J, Juutilainen J, Naarala J.	2010-04-28	No Effect	Continuous			RF Signal Generator	https://www.emf-portal.org/en/article/18142	UHF (300 MHz-3 GHz) studies	Finnish Cultural Foundation of Northern Savo; Finnish Graduate School of Environmental Health (SYTYKE) Finnish mobile phone manufacturers and operators; Tekes (National Technology Agency), Finland; Ministry of Education, Finland	1	0
2124	Cytogenetic effects of 900 MHz (GSM) microwaves on human lymphocytes	Maes A, Collier M, Verschaeve L.	2001-01-23	Uncertain Effect	Pulsed	Simulated		Mobile Phone CDMA Simulated	https://www.emf-portal.org/en/article/5625	UHF (300 MHz-3 GHz) studies	Belgacom, Belgium	1	0
2127	Effects of modulated microwave radiation at cellular telephone frequency (1.95 GHz) on X-ray-induced chromosome aberrations in human lymphocytes in vitro	Manti L, Braselmann H, Calabrese ML, Massa R, Pugliese M, Scampoli P, Sicignano G, Grossi G.	2008-05-01	Effect	Pulsed	Simulated		Mobile phone UMTS Simulated	https://www.emf-portal.org/en/article/15911	UHF (300 MHz-3 GHz) studies	Centre of Competence on Information and Communication Technologies, Regione Campania, Italy Project "Wireless Technology Health Risks", Italy The ICT Competence Center is an "interface" between the world of research and that of businesses, between supply and demand for technology in Campania.	1	0
2129	Exposure to 900 MHz electromagnetic field induces an unbalance between pro-apoptotic and pro-survival signals in T-lymphoblastoid leukemia CCRF-CEM cells	Marinelli F, La Sala D, Cicciotti G, Cattini L, Trimarchi C, Putti S, Zamparelli A, Giuliani L, Tomassetti G, Cinti C.	2003-09-18	Effect	Continuous			RF Signal Generator and Transverse Electromagnetic (TEM) Cell	https://www.emf-portal.org/en/article/10381	UHF (300 MHz-3 GHz) studies	Ministry of University and Research, Italy; National Research Council (CNR; Consiglio Nazionale delle Ricerche); Italy; ISPESL; National Institute for Occupational Safety and Prevention, Italy WWF, Italy	1	0
2130	Apoptosis induced by ultraviolet radiation is enhanced by amplitude modulated radiofrequency radiation in mutant yeast cells	Markkanen A, Penttinen P, Naarala J, Pelkonen J, Sihvonen AP, Juutilainen J.	2004-01-14	Effect	Pulsed	Simulated		Mobile Phone GSM Simulated	https://www.emf-portal.org/en/article/10487	UHF (300 MHz-3 GHz) studies	Nokia; Finnish 2G ; Elisa Communications Corporation, Finland ;Benefon, Finland ;Sonera, Finland Tekes (National Technology Agency), Finland	1	0
2131	Exposure of human peripheral blood lymphocytes to electromagnetic fields associated with cellular phones leads to chromosomal instability	Mashevich M, Folkman D, Kesar A, Barbul A, Korenstein R, Jerby E, Avivi L.	2003-02-01	Effect	Continuous			Microwave Signal Generator	https://www.ncbi.nlm.nih.gov/pubmed/12524674	UHF (300 MHz-3 GHz) studies	MAFAT/IMOD - Ministry of Defence	1	0
2133	Chronic 835 MHz radiofrequency exposure to mice hippocampus alters the distribution of calbindin and GFAP immunoreactivity	Maskey D, Pradhan J, Aryal B, Lee CM, Choi IY, Park KS, Kim SB, Kim HG, Kim MJ.	2010-07-30	Effect	Pulsed	Simulated		Mobile Phone CDMA Simulated	https://www.emf-portal.org/en/article/18345	UHF (300 MHz-3 GHz) studies	Dankook University, South Korea	0	1
2134	Increased levels of numerical chromosome aberrations after in vitro exposure of human peripheral blood lymphocytes to radiofrequency electromagnetic fields for 72 hours	Mazor R, Korenstein-Ilan A, Barbul A, Eshet Y, Shahadi A, Jerby E, Korenstein R.	2008-01-01	Effect	Continuous			RF Signal Generator	https://www.ncbi.nlm.nih.gov/pubmed/18159938	UHF (300 MHz-3 GHz) studies	MA-FAT/IMOD - Ministry of Defence	1	0
2135	DNA damage in human leukocytes after acute in vitro exposure to a 1.9 GHz pulse-modulated radiofrequency field	McNamee JP, Bellier PV, Gajda GB, Lavallée BF, Lemay EP, Marro L, Thansandote A.	2002-10-01	No Effect	Pulsed	Simulated		Mobile Phone TDMA Simulated	https://www.ncbi.nlm.nih.gov/pubmed/12236821	UHF (300 MHz-3 GHz) studies	Not Stated	1	0
2136	No evidence for genotoxic effects from 24 h exposure of human leukocytes to 1.9 GHz radiofrequency fields	McNamee JP, Bellier PV, Gajda GB, Lavallee BF, Marro L, Lemay E, Thansandote A.	2003-05-01	No Effect	Pulsed	Simulated		Mobile Phone TDMA Simulated	https://www.emf-portal.org/en/article/9883	UHF (300 MHz-3 GHz) studies	Not Stated	1	0
2137	DNA damage and micronucleus induction in human leukocytes after acute in vitro exposure to a 1.9 GHz continuous-wave radiofrequency field	McNamee JP, Bellier PV, Gajda GB, Lavallee BF, Lemay EP, Marro L, Thansandote A.	2002-10-01	No Effect	Continuous			RF Signal Generator	https://www.emf-portal.org/en/article/9740	UHF (300 MHz-3 GHz) studies	Not Stated	1	0
2138	Proliferation and apoptosis in a neuroblastoma cell line exposed to 900 MHz modulated radiofrequency field	Merola P, Marino C, Lovisolo GA, Pinto R, Laconi C, Negroni A.	2006-01-25	No Effect	Pulsed	Simulated		Mobile Phone GSM Simulated	https://www.emf-portal.org/en/article/13176	UHF (300 MHz-3 GHz) studies	Ministero dell' Università e della Ricerca (MIUR ; Ministry of University and Research), Italy ; V FP RAMP 2001 project	1	0
2140	Effects of high-frequency electromagnetic fields on DNA strand breaks using comet assay method	Miyakoshi, J, Yoshida M, Tarusawa Y, Nojima T, Wake K, Taki M.	2002-09-18	No Effect	Continuous			Microwave	http://onlinelibrary.wiley.com/doi/10.1002/eej.10075/abstract	UHF (300 MHz-3 GHz) studies	Japan Society for the Promotion of Science.	1	0
2141	Effects of exposure to a 1950 MHz radio frequency field on expression of Hsp70 and Hsp27 in human glioma cells	Miyakoshi J, Takemasa K, Takashima Y, Ding GR, Hirose H, Koyama S.	2005-04-14	Effect	Continuous	Simulated		Mobile Phone GSM Simulated	https://www.emf-portal.org/en/article/11839	UHF (300 MHz-3 GHz) studies	NTT DoCoMo, Japan & Japan Society for the Promotion of Science. http://www.jsps.go.jp/english/aboutus/	1	0
2142	Electromagnetic field (EMF) effects on channel activity of nanopore OmpF protein	Mohammadzadeh M, Mobasheri H, Arazm F.	2009-07-15	Effect	Continuous			Microwave	https://www.emf-portal.org/en/article/17275	UHF (300 MHz-3 GHz) studies	University of Tehran, Iran	1	0
2143	Microscopic observation of living cells during their exposure to modulated electromagnetic fields	Moisescu MG, Leveque P, Bertrand JR, Kovacs E, Mir LM.	2008-11-01	Effect	Pulsed	Simulated		Mobile Phone GSM Simulated	https://www.ncbi.nlm.nih.gov/pubmed/18272432	UHF (300 MHz-3 GHz) studies	Ministry of National Education and Research), France & Institut Gustave-Roussy, Villejuif, France French National Center for Scientific Research) France & Ministry of Research and Technology, Romania & Scientific Committee of the ACI "Biological effects of mobile radiotelephony"	1	0
2146	Exposure to low level GSM 935 MHZ radiofrequency fields does not induce apoptosis in proliferating or differentiated murine neuroblastoma cells	Moquet J, Ainsbury E, Bouffler S, Lloyd D.	2008-06-10	No Effect	Pulsed	Real		Mobile Phone GSM	https://www.emf-portal.org/en/article/16037	UHF (300 MHz-3 GHz) studies	Swiss Research Foundation on Mobile Communication http://www.emf.ethz.ch/en/foundation/sponsors-supporters/?text=50%2520hz	1	0
2148	Effects of mobile phone radiofrequency on the structure and function of the normal human hemoglobin	Mousavy SJ, Riazi GH, Kamarei M, Aliakbarian H, Sattarahmady N, Sharifizadeh A, Safarian S, Ahmad F, Moosavi-Movahedi AA.	2009-04-01	Effect	Continuous	Simulated		Mobile Phone Simulated	https://www.emf-portal.org/en/article/16853	UHF (300 MHz-3 GHz) studies	University of Tehran, Iran & Iran National Science Foundation (INSF)	1	0
2157	Effects of GSM 1800 MHz on dendritic development of cultured hippocampal neurons	Ning W, Xu SJ, Chiang H, Xu ZP, Zhou SY, Yang W, Luo JH.	2007-12-01	Effect	Pulsed	Simulated		Mobile Phone GSM Simulated	https://www.emf-portal.org/en/article/15405	UHF (300 MHz-3 GHz) studies	National Natural Science Foundation (NSFC), China & Zhejiang Provincial Natural Science Foundation, China	1	0
2158	Proteomic Analysis of the Response of Human Endothelial Cell Line EA.hy926 to 1800 GSM Mobile Phone Radiation	Nylund, R, Tammio H, Kuster N, Leszczynski D.	2009-10-01	Effect	Pulsed	Real		Mobile Phone GSM	https://www.omicsonline.org/proteomic-analysis-of-the-response-of-human-endothelial-cell-line-ea.hy926-jpb.1000105.php?aid=1408	UHF (300 MHz-3 GHz) studies	STUK and IT’IS Foundation, Swiss Federal Institute of Technology, Zurich, Switzerland	1	0
2159	Analysis of proteome response to the mobile phone radiation in two types of human primary endothelial cells	Nylund R, Kuster N, Leszczynski D.	2010-10-18	No Effect	Pulsed	Real		Mobile Phone GSM	https://www.ncbi.nlm.nih.gov/pubmed/20955554	UHF (300 MHz-3 GHz) studies	This project was funded by STUK (Finland) and Swiss Federal Institute of Technology	1	0
2160	Proteomics analysis of human endothelial cell line EA.hy926 after exposure to GSM 900 radiation	Nylund R, Leszczynski D.	2004-03-30	Effect	Pulsed	Simulated		Mobile Phone GSM Simulated	https://www.ncbi.nlm.nih.gov/pubmed/15188403	UHF (300 MHz-3 GHz) studies	EU (REFLEX project) and by the Finnish Technology Development Agency – Tekes (LaVita project).	1	0
2161	Mobile phone radiation causes changes in gene and protein expression in human endothelial cell lines and the response seems to be genome- and proteome-dependent	Nylund R, Leszczynski D.	2006-07-28	Effect	Pulsed	Simulated		Mobile Phone GSM Simulated	https://www.emf-portal.org/en/article/14052	UHF (300 MHz-3 GHz) studies	European Union (EU)/European Commission & Academy of Finland & Tekes (National Technology Agency), Finland & STUK (Radiation and Nuclear Safety Authority), Helsinki, Finland	1	0
2162	Exposure to GSM RF fields does not affect calcium homeostasis in human endothelial cells, rat pheocromocytoma cells or rat hippocampal neurons	O'Connor RP, Madison SD, Leveque P, Roderick HL, Bootman MD.	2010-07-27	No Effect	Pulsed			Transverse Electromagnetic (TEM) Cell	https://www.ncbi.nlm.nih.gov/pubmed/20676401	UHF (300 MHz-3 GHz) studies	Biotechnology and Biological Sciences Research Council and the Mobile Telecommunications and Health Research (MTHR) Programme.	1	0
2163	Exposure to global system for mobile communication (GSM) cellular phone radiofrequency alters gene expression, proliferation, and morphology of human skin fibroblasts	Pacini S, Ruggiero M, Sardi I, Aterini S, Gulisano F, Gulisano M.	2002-01-01	Effect	Pulsed	Real		Mobile Phone GSM	https://www.emf-portal.org/en/article/9814	UHF (300 MHz-3 GHz) studies	University of Firenze, Italy	1	0
2168	Tight junctional changes upon microwave and x-ray irradiation	Pálfia Z, Somosy Z, Réz G.	2005-07-22	Effect	Pulsed			RF Signal Generator	https://www.ncbi.nlm.nih.gov/pubmed/11693991	UHF (300 MHz-3 GHz) studies	Not Known	1	0
2170	Effect of high SARs produced by cell phone like radiofrequency fields on mollusk single neuron	Partsvania B, Sulaberidze T, Shoshiashvili L.	2012-10-09	Effect	Pulsed			Transverse Electromagnetic (TEM) Cell	https://www.emf-portal.org/en/article/21310	UHF (300 MHz-3 GHz) studies	Rustaveli National Science Foundation.	1	0
2171	Acute Effect of Exposure of Mollusk Single Neuron to 900-MHz Mobile Phone Radiation	Partsvania B, Sulaberidze T, Shoshiashvili L, Modebadze Z.	2011-08-23	Effect	Pulsed			Transverse Electromagnetic (TEM) Cell	https://www.emf-portal.org/en/article/19554	UHF (300 MHz-3 GHz) studies	Shota Rustaveli National Science Foundation (SRNSF), Georgia	1	0
2172	Effect of low intensity pulse-modulated electromagnetic radiation on activity of alkaline phosphatase in blood serum	Pashovkina MS, Akoev IG.	2001-01-01	Effect	Pulsed			Microwave	https://www.ncbi.nlm.nih.gov/pubmed/11253703	UHF (300 MHz-3 GHz) studies	Not Known	1	0
2173	Effect of low-intensity pulse-modulated microwave on human blood aspartate aminotransferase activity	Pashovkina MS, Akoev IG.	2001-01-01	Effect	Pulsed			Microwave	https://www.ncbi.nlm.nih.gov/pubmed/11253702	UHF (300 MHz-3 GHz) studies	Not Known	1	0
2174	Change of cholinesterase relative activity under modulated ultra high frequency electromagnetic radiation in experiments in vitro	Pashovkina MS, Pashovkin TN.	2011-05-01	Effect	Pulsed			Microwave	https://www.ncbi.nlm.nih.gov/pubmed/21866837	UHF (300 MHz-3 GHz) studies	Not Known	1	0
2176	Impact of 864 MHz or 935 MHz radiofrequency microwave radiation on the basic growth parameters of V79 cell line	Pavicic, I, Trosic I.	2008-02-15	Effect	Continuous			Transcranial Magnetic Stimulation	https://www.emf-portal.org/en/article/15860	UHF (300 MHz-3 GHz) studies	Ministry of Science, Education and Sports, Republic of Croatia	1	0
2178	Comparison of 864 MHz and 935 MHz microwave radiation effects on cell culture	Pavicic I, Trosic I, Sarolić A.	2006-06-01	Effect	Continuous			Transverse Electromagnetic (TEM) Cell	https://www.ncbi.nlm.nih.gov/pubmed/16832969	UHF (300 MHz-3 GHz) studies	Not Known	1	0
2180	Non-thermal effects of continuous 2.45 GHz microwaves on Fas-induced apoptosis in human Jurkat T-cell line	Peinnequin A, Piriou A, Mathieu J, Dabouis V, Sebbah C, Malabiau R, Debouzy JC.	2000-06-01	Effect	Continuous			RF Signal Generator	https://www.emf-portal.org/en/article/6204	UHF (300 MHz-3 GHz) studies	Direction générale de l'armement (DGA) - Ministère de la Défense / DGA for the French defence industry	1	0
2181	Demodulation effect is observed in neurones by exposure to low frequency modulated microwaves	Perez-Bruzon RN, Figols T, Azanza MJ, del Moral A.	2010-12-01	Effect	Amplitude Modulation			Microwave	http://iopscience.iop.org/article/10.1088/1742-6596/200/12/122008/meta;jsessionid=E301443F5E8A37C9F5C35B1DDB4B9323.ip-10-40-1-105	UHF (300 MHz-3 GHz) studies	Spanish Ministry of Defence	1	0
2183	Evaluation of the co-genotoxic effects of 1800 MHz GSM radiofrequency exposure and a chemical mutagen in cultured human cells	Perrin A, Freire M, Bachelet C, Collin A, Leveque P, Pla S, Debouzy JC.	2010-10-30	Effect	Pulsed	Simulated		Mobile Phone GSM Simulated	https://www.emf-portal.org/en/article/19405	UHF (300 MHz-3 GHz) studies	Fondation Santé et Radiofréquences, France & Direction générale pour l'Armement (DGA), France	1	0
2184	Comparison of cytotoxic and genotoxic effects of plutonium-239 alpha particles and mobile phone GSM 900 radiation in the Allium cepa test	Pesnya DS, Romanovsky AV.	2013-01-01	Effect	Pulsed	Real		Mobile Phone GSM	https://www.ncbi.nlm.nih.gov/pubmed/23059817	UHF (300 MHz-3 GHz) studies	Not Stated	0	1
2186	Acute exposure to low-level CW and GSM-modulated 900 MHz radiofrequency does not affect Ba 2+ currents through voltage-gated calcium channels in rat cortical neurons	Platano D, Mesirca P, Paffi A, Pellegrino M, Liberti M, Apollonio F, Bersani F, Aicardi G.	2007-07-09	No Effect	Continuous			Microwave	https://www.emf-portal.org/en/article/14842	UHF (300 MHz-3 GHz) studies	EU)/European Commission & Scientifica e Tecnologica); Ministry of University and Research), Italy Fondazione del Monte di Bologna e Ravenna, Italy & European Project RAMP "Risk Assessment for Exposure of Nervous System Cells to Mobile Telephone EMF: from in Vitro to in Vivo Studies"	1	0
2187	The effects of low level microwaves on the fluidity of photoreceptor cell membrane	Pologea-Moraru R, Kovacs E, Iliescu KR, Calota V, Sajin G.	2002-05-01	Effect	Not Stated			RF Signal Generator	https://www.emf-portal.org/en/article/8788	UHF (300 MHz-3 GHz) studies	Not Stated	1	0
2188	Influence of high-frequency electromagnetic fields on different modes of cell death and gene expression	Port M, Abend M, Römer B, Van Beuningen D.	2003-07-03	Uncertain Effect	Pulsed			Signal Generator	https://www.ncbi.nlm.nih.gov/pubmed/14703943	UHF (300 MHz-3 GHz) studies	German Ministry of Defence.	1	0
2190	Microarray gene expression profiling of a human glioblastoma cell line exposed in vitro to a 1.9 GHz pulse-modulated radiofrequency field	Qutob SS, Chauhan V, Bellier PV, Yauk CL, Douglas GR, Berndt L, Williams A, Gajda GB, Lemay E, Thansandote A, McNamee JP.	2006-06-01	No Effect	Pulsed	Simulated		Mobile Phone GSM Simulated	https://www.emf-portal.org/en/article/13899	UHF (300 MHz-3 GHz) studies	Health Canada Genomics R & D fund	1	0
2194	Effects of 2.45 GHz microwave fields on liposomes entrapping glycoenzyme ascorbate oxidase: evidence for oligosaccharide side chain involvement	Ramundo-Orlando A, Liberti M, Mossa G, D'Inzeo G.	2004-06-09	Effect	Continuous			RF Signal Generator	https://www.emf-portal.org/en/article/10756	UHF (300 MHz-3 GHz) studies	Not Stated	1	0
2196	Gene expression changes in human cells after exposure to mobile phone	Remondini D, Nylund R, Reivinen J, Poulletier de Gannes F, Veyret B, Lagroye I, Haro E, Trillo MA, Capri M, Franceschi C, Schlatterer K, Gminski R, Fitzner R, Tauber R, Schuderer J, Kuster N, Leszczynski D, Bersani F, Maercker C.	2006-07-28	Effect	Pulsed	Simulated		Mobile Phone GSM Simulated	https://www.emf-portal.org/en/article/14041	UHF (300 MHz-3 GHz) studies	European Union (EU)/European Commission & VERUM Foundation & Federal Ministry for Education & Research), Germany	1	0
2198	Neoplastic transformation in C3H 10T(1/2) cells after exposure to 835.62 MHz FDMA and 847.74 MHz CDMA radiations	Roti Roti JL, Malyapa RS, Bisht KS, Ahern EW, Moros EG, Pickard WF, Straube WL	2001-01-01	No Effect	Pulsed	Simulated		Mobile Phone FDMA Simulated	https://www.emf-portal.org/en/article/5186	UHF (300 MHz-3 GHz) studies	Motorola	1	0
2200	Human keratinocytes in culture exhibit no response when exposed to short duration, low amplitude, high frequency (900 MHz) electromagnetic fields in a reverberation chamber	Roux D, Girard S, Paladian F, Bonnet P, Lallechere S, Gendraud M, Davies E, Vian A.	2010-12-22	Uncertain Effect	Continuous	Simulated		Mobile Phone GSM Simulated	https://www.emf-portal.org/en/article/18852	UHF (300 MHz-3 GHz) studies	Fondation Santé et Radiofréquences, France	1	0
2202	Monitoring dynamic reactions of red blood cells to UHF electromagnetic waves radiation using a novel micro-imaging technology	Ruan P, Yong J, Shen H, Zheng X.	2012-06-07	Effect	Pulsed	Simulated		Mobile Phone GSM Simulated	https://www.ncbi.nlm.nih.gov/pubmed/22676049	UHF (300 MHz-3 GHz) studies	Science and Technology Fund of Guangdong Province	1	0
2204	DNA strand breaks are not induced in human cells exposed to 2.1425 GHz band CW and W-CDMA modulated radiofrequency fields allocated to mobile radio base stations	Sakuma N, Komatsubara Y, Takeda H, Hirose H, Sekijima M, Nojima T, Miyakoshi J.	2005-11-10	No Effect	Pulsed	Simulated		Mobile Phone W-CDMA Simulated	https://www.ncbi.nlm.nih.gov/pubmed/16283663	UHF (300 MHz-3 GHz) studies	Mitsubishi Chemical Safety Institute Ltd.	1	0
2205	Analysis of Gene Expression in a Human-derived Glial Cell Line Exposed to 2.45 GHz Continuous Radiofrequency Electromagnetic Fields	Sakurai T, Kiyokawa T, Narita E, Suzuki Y, Taki M, Miyakoshi J.	2011-02-01	No Effect	Continuous			RF Signal Generator	https://www.emf-portal.org/en/article/19038	UHF (300 MHz-3 GHz) studies	Ministry of Internal Affairs and Communications, Japan	1	0
2208	In vitro study of the stress response of human skin cells to GSM-1800 mobile phone signals compared to UVB radiation and heat shock	Sanchez S, Haro E, Ruffie G, Veyret B, Lagroye I.	2007-05-01	No Effect	Pulsed	Simulated		Mobile Phone GSM Simulated	https://www.emf-portal.org/en/article/14686	UHF (300 MHz-3 GHz) studies	France Telecom & Bouygues Telecom, France & Aquitaine Research Council, France &French National Center for Scientific Research	1	0
2209	Human skin cell stress response to GSM-900 mobile phone signals. In vitro study on isolated primary cells and reconstructed epidermis	Sanchez S, Milochau A, Ruffie G, Poulletier de Gannes F, Lagroye I, Haro E, Surleve-Bazeille JE, Billaudel B, Lassegues M, Veyret B.	2006-11-09	Effect	Pulsed	Real		Mobile Phone GSM	https://www.emf-portal.org/en/article/14342	UHF (300 MHz-3 GHz) studies	France Telecom Aquitaine Research Council & French National Centre for Scientific Research	1	0
2210	Human fibroblasts and 900 MHz radiofrequency radiation: evaluation of DNA damage after exposure and co-exposure to 3-chloro-4-(dichloromethyl)-5-hydroxy-2(5h)-furanone (MX)	Sannino A, Di Costanzo G, Brescia F, Sarti M, Zeni O, Juutilainen J, Scarfi MR.	2009-06-01	No Effect	Pulsed	Simulated		Mobile Phone GSM Simulated	https://www.emf-portal.org/en/article/17175	UHF (300 MHz-3 GHz) studies	European Union (EU)/European Commission & Italian Consortium ELETTRA 2000 & CEMFEC ((EU program "Combined Effects of Electromagnetic Fields with Environmental Carcinogens")	1	0
2211	Induction of adaptive response in human blood lymphocytes exposed to radiofrequency radiation	Sannino A, Sarti M, Reddy SB, Prihoda TJ, Vijayalaxmi, Scarfì MR.	2009-06-01	Effect	Pulsed	Simulated		Mobile Phone GSM Simulated	https://www.ncbi.nlm.nih.gov/pubmed/19580480	UHF (300 MHz-3 GHz) studies	Not Stated	1	0
2212	Induction of adaptive response in human blood lymphocytes exposed to 900 MHz radiofrequency fields: Influence of cell cycle	Sannino A, Zeni O, Sarti M, Romeo S, Reddy SB, Belisario MA, Prihoda TJ, Vijayalaxmi, Scarfi MR	2011-05-11	Effect	Pulsed	Simulated		Mobile Phone GSM Simulated	https://www.emf-portal.org/en/article/19265	UHF (300 MHz-3 GHz) studies	Not Stated	1	0
2213	Evaluation of Cytotoxic and Genotoxic Effects in Human Peripheral Blood Leukocytes Following Exposure to 1950-MHz Modulated Signal	Sannino A, Calabrese ML, d'Ambrosio G, Massa R, Petraglia G, Mita P, Sarti M, Scarfi MR.	2006-08-14	No Effect	Pulsed	Simulated		UMTS simulated	https://www.emf-portal.org/en/article/15411	UHF (300 MHz-3 GHz) studies	Not Stated	1	0
2214	Experimental Study of Relationship between Biological Hazards of Low-Dose Radiofrequency Exposure and Energy Flow Density in Spirostomum Ambiguum Infusoria Exposed at a Mobile Connection Frequency (1 GHz)	Sarapultseva EI, Igolkina JV.	2011-04-01	Effect	Pulsed	Real		Mobile Phone CDMA	https://www.ncbi.nlm.nih.gov/pubmed/22448371	UHF (300 MHz-3 GHz) studies	Not Stated	1	0
2215	Nonthermal GSM microwaves affect chromatin conformation in human lymphocytes similar to heat shock	Sarimov, R.; Malmgren, L.O.G.; Markova, E.; Persson, B.R.R.; Belyaev, I.Y.	2004-09-01	Effect	Pulsed			Transverse Electromagnetic (TEM) Cell	https://www.emf-portal.org/en/article/13460	UHF (300 MHz-3 GHz) studies	Swedish Council for Working Life and Social Research (FAS) & Swedish Radiation Protection Authority (SSI)	1	0
2216	Exposure to radiofrequency radiation (900 MHz, GSM signal) does not affect micronucleus frequency and cell proliferation in human peripheral blood lymphocytes: an interlaboratory study	Scarfi MR, Fresegna AM, Villani P, Pinto R, Marino C, Sarti M, Altavista P, Sannino A, Lovisolo GA.	2006-06-01	No Effect	Pulsed	Simulated		Mobile Phone GSM Simulated	https://www.emf-portal.org/en/article/13901	UHF (300 MHz-3 GHz) studies	Food and Drug Administration (FDA), USA & Cellular Telecommunications & Internet Association, USA	1	0
2217	Electromagnetic fields (1.8 GHz) increase the permeability to sucrose of the blood-brain barrier in vitro	Schirmacher A, Winters S, Fischer S, Goeke J, Galla HJ, Kullnick U, Ringelstein EB, Stogbauer F.	2000-07-01	Effect	Pulsed	Simulated		Mobile Phone GSM Simulated	https://www.emf-portal.org/en/article/3911	UHF (300 MHz-3 GHz) studies	Ministry of School, Further Education, Science and Research of North Rhine-Westphalia), Germany Innovative Medizinische Forschung, University of Münster, Germany	1	0
2218	Spindle disturbances in human-hamster hybrid (A(L)) cells induced by the electrical component of the mobile communication frequency range signal	Schrader T, Münter K, Kleine-Ostmann T, Schmid E.	2008-05-30	Effect	Continuous			RF Signal Generator	https://www.emf-portal.org/en/article/16004	UHF (300 MHz-3 GHz) studies	Ludwig-Maximilian University, Munich & Physikalisch-Technische Bundesanstalt PTB), Braunschweig, Germany	1	0
2219	Spindle disturbances in human-hamster hybrid (AL) cells induced by mobile communication frequency range signals	Schrader T, Kleine-Ostmann T, Münter K, Jastrow C, Schmid E.	2010-12-22	Effect	Continuous			RF Signal Generator	https://www.emf-portal.org/en/article/18854	UHF (300 MHz-3 GHz) studies	Not Stated	1	0
2220	Radiofrequency electromagnetic fields (UMTS, 1,950 MHz) induce genotoxic effects in vitro in human fibroblasts but not in lymphocytes	Schwarz C, Kratochvil E, Pilger A, Kuster N, Adlkofer F, Rudiger HW.	2008-02-16	Effect	Pulsed	Simulated		UMTS simulated	https://www.emf-portal.org/en/article/15682	UHF (300 MHz-3 GHz) studies	ERUM Foundation German & Austrian Science Fund Austria & Austrian Workers' Comp Board Vienna	1	0
2222	2-GHz Band CW and W-CDMA Modulated Radiofrequency Fields Have No Significant Effect on Cell Proliferation and Gene Expression Profile in Human Cells	Sekijima M, Takeda H, Yasunaga K, Sakuma N, Hirose H, Nojima T, Miyakoshi J.	2010-03-09	Uncertain Effect	Continuous			WCDMA Wideband Code Division Multiple Access 3G	https://www.emf-portal.org/en/article/18030	UHF (300 MHz-3 GHz) studies	NTT DoCoMo, Japan	1	0
2223	Mobile phone radiation interferes laboratory immunoenzymometric assays: Example chorionic gonadotropin assays	Shahbazi-Gahrouei D, Mortazavi SM, Nasri H, Baradaran A, Baradaran-Ghahfarokhi M, Baradaran-Ghahfarokhi HR.	2012-02-01	Effect	Pulsed	Real		Mobile Phone GSM	https://www.ncbi.nlm.nih.gov/pubmed/22325369	UHF (300 MHz-3 GHz) studies	No Conflict of Interest Stated	1	0
2224	Cell phone radiations affect early growth of Vigna radiata (mung bean) through biochemical alterations	Sharma VP, Singh HP, Batish DR, Kohli RK.	2010-01-01	Effect	Pulsed	Real		Mobile Phone GSM	https://www.ncbi.nlm.nih.gov/pubmed/20355324	UHF (300 MHz-3 GHz) studies	Not Stated	1	0
2229	Hsp70 expression and free radical release after exposure to non-thermal radio-frequency electromagnetic fields and ultrafine particles in human Mono Mac 6 cells	Simkó M, Hartwig C, Lantow M, Lupke M, Mattsson MO, Rahman Q, Rollwitz J.	2006-02-08	No Effect	Continuous	Simulated		Mobile Phone GSM Simulated	https://www.emf-portal.org/en/article/12492	UHF (300 MHz-3 GHz) studies	Federal Office for Radiation Protection, Salzgitter, Germany	1	0
2230	Exposure to acute electromagnetic radiation of mobile phone exposure range alters transiently skin homeostasis of a model of pigmented reconstructed epidermis	Simon D, Daubos A, Pain C, Fitoussi R, Vié K, Taieb A, de Benetti L, Cario-André M.	2012-08-31	Effect	Pulsed	Simulated		Mobile Phone GSM Simulated	https://www.ncbi.nlm.nih.gov/pubmed/22938144	UHF (300 MHz-3 GHz) studies	own funds of collaborating laboratories.	1	0
2233	Genotoxic effects of exposure to radiofrequency electromagnetic fields (RF-EMF) in cultured mammalian cells are not independently reproducible	Speit G, Schütz P, Hoffmann H.	2007-01-10	No Effect	Continuous			RF Signal Generator	https://www.ncbi.nlm.nih.gov/pubmed/16997616	UHF (300 MHz-3 GHz) studies	VERUM foundation	1	0
2236	Effect of electromagnetic field produced by mobile phones on the activity of superoxide dismutase (SOD-1) and the level of malonyldialdehyde (MDA)--in vitro study	Stopczyk D, Gnitecki W, Buczyński A, Markuszewski L, Buczyński J.	2002-01-01	Effect	Pulsed		1	Mobile Phone GSM	https://www.ncbi.nlm.nih.gov/pubmed/12474410	UHF (300 MHz-3 GHz) studies	Not Known	1	0
2237	935 MHz cellular phone radiation. An in vitro study of genotoxicity in human lymphocytes	Stronati L, Testa A, Moquet J, Edwards A, Cordelli E, Villani P, Marino C, Fresegna AM, Appolloni M, Lloyd D.	2006-03-28	Uncertain Effect	Pulsed	Simulated		Mobile Phone GSM Simulated	https://www.emf-portal.org/en/article/13927	UHF (300 MHz-3 GHz) studies	GSM Association, UK/Ireland & Mobile Manufacturers Forum (MMF), Belgium	1	0
2239	1800 MHz electromagnetic field effects on melatonin release from isolated pineal glands	Sukhotina I, Streckert JR, Bitz AK, Hansen VW, Lerchl A.	2006-01-01	Effect	Continuous	Simulated		Mobile Phone GSM Simulated	https://www.emf-portal.org/en/article/12923	UHF (300 MHz-3 GHz) studies	Federal Office for Radiation Protection, Salzgitter, Germany	1	0
2240	Effect of acute exposure to microwave from mobile phone on DNA damage and repair of cultured human lens epithelial cells in vitro	Sun LX, Yao K, He JL, Lu DQ, Wang KJ, Li HW.	2006-08-01	Effect	Pulsed	Simulated		Mobile Phone GSM Simulated	https://www.ncbi.nlm.nih.gov/pubmed/16978512	UHF (300 MHz-3 GHz) studies	Not Known	1	0
2241	DNA damage and repair induced by acute exposure of microwave from mobile phone on cultured human lens epithelial cells	Sun LX, Yao K, Jiang H, He JL, Lu DQ, Wang KJ, Li HW.	2006-12-01	Effect	Pulsed	Simulated		Mobile Phone GSM Simulated	https://www.ncbi.nlm.nih.gov/pubmed/17415965	UHF (300 MHz-3 GHz) studies	Not Known	1	0
2243	A 1.8-GHz radiofrequency radiation induces EGF receptor clustering and phosphorylation in cultured human amniotic (FL) cells	Sun W, Shen X, Lu D, Fu Y, Lu D, Chiang H.	2011-11-18	Effect	Pulsed	Simulated		Mobile Phone GSM Simulated	https://www.emf-portal.org/en/article/19836	UHF (300 MHz-3 GHz) studies	National Natural Science Foundation (NSFC), China Program 973, China & Major State Basic Research Development Program, China	1	0
2247	Effects of continuous and intermittent exposure to RF fields with a wide range of SARs on cell growth, survival, and cell cycle distribution	Takashima Y, Hirose H, Koyama S, Suzuki Y, Taki M, Miyakoshi J.	2006-04-13	Effect	Continuous			RF Signal Generator	https://www.emf-portal.org/en/article/13771	UHF (300 MHz-3 GHz) studies	Ministry of Internal Affairs and Communications, Japan	1	0
2248	Effects of low intensity radiofrequency electromagnetic fields on electrical activity in rat hippocampal slices	Tattersall JE, Scott IR, Wood SJ, Nettell JJ, Bevir MK, Wang Z, Somasiri NP, Chen X.	2001-06-15	Effect	Continuous			Microwave	https://www.emf-portal.org/en/article/7088	UHF (300 MHz-3 GHz) studies	Ministry of Defence (MOD), UK	1	0
2249	GSM-900MHz at low dose temperature-dependently downregulates alpha-synuclein in cultured cerebral cells independently of chaperone-mediated-autophagy	Terro F, Magnaudeix A, Crochetet M, Martin L, Bourthoumieu S, Wilson CM, Yardin C, Leveque P.	2011-12-13	Effect	Pulsed	Simulated		Mobile Phone GSM Simulated	https://www.emf-portal.org/en/article/19999	UHF (300 MHz-3 GHz) studies	Fondation Santé et Radiofréquences, France	1	0
2251	Exposure of cultured astroglial and microglial brain cells to 900 MHz microwave radiation	Thorlin T, Rouquette JM, Hamnerius Y, Hansson E, Persson M, Bjorklund U, Rosengren L, Ronnback L, Persson M.	2006-08-01	No Effect	Pulsed	Simulated		Mobile Phone GSM Simulated	https://www.emf-portal.org/en/article/14051	UHF (300 MHz-3 GHz) studies	Swedish Council for Working Life and Social Research (FAS) & Swedish Medical Research Council (SMRC), Sweden Ahlén-Foundation, Sweden & Edith Jacobssons Foundation for Neurological Research, Sweden Fredrik and Ingrid Thurings Foundation, Sweden & Gun and Bertil Stohnes Foundation, Sweden	1	0
2252	Exposure to 2.45 GHz electromagnetic fields induces hsp70 at a high SAR of more than 20 W/kg but not at 5W/kg in human glioma MO54 cells	Tian F, Nakahara T, Wake K, Taki M, Miyakoshi J.	2002-05-01	Effect	Continuous			Microwave	https://www.emf-portal.org/en/article/8791	UHF (300 MHz-3 GHz) studies	Association of Radio Industries and Businesses (ARIB), Japan & Research for Future Program, Japan Society for the Promotion of Science (JSPS), Japan, JSPS is a University-Industry Research Cooperation Society	1	0
2254	Combinative exposure effect of radio frequency signals from CDMA mobile phones and aphidicolin on DNA integrity	Tiwari R, Lakshmi NK, Surender V, Rajesh AD, Bhargava SC, Ahuja YR.	2009-07-07	Effect	Pulsed	Real		Mobile Phone CDMA	https://www.emf-portal.org/en/article/16591	UHF (300 MHz-3 GHz) studies	Not Stated	1	0
2257	Cytostatic response of NB69 cells to weak pulse-modulated 2.2 GHz radar-like signals	Trillo MA, Cid MA, Martinez MA, Page JE, Esteban J, Ubeda A.	2011-07-01	Effect	Pulsed			Microwave	https://www.emf-portal.org/en/article/18973	UHF (300 MHz-3 GHz) studies	Ministerio de Defensa de Espana (Ministry of Defence, Spain)	1	0
2258	Microwave electromagnetic field regulates gene expression in T-lymphoblastoid leukemia CCRF-CEM cell line exposed to 900 MHz	Trivino Pardo JC, Grimaldi S, Taranta M, Naldi I, Cinti C.	2012-03-01	Effect	Continuous			Transverse Electromagnetic (TEM) Cell	https://www.emf-portal.org/en/article/20263	UHF (300 MHz-3 GHz) studies	National Research Council (CNR; Consiglio Nazionale delle Ricerche); Italy	1	0
2259	Disturbance of cell proliferation in response to mobile phone frequency radiation	Trosic I, Pavicic I.	2009-03-01	Effect	Continuous			Microwave	https://www.emf-portal.org/en/article/16962	UHF (300 MHz-3 GHz) studies	Ministry of Science, Education and Sports, Republic of Croatia	1	0
2260	In vitro effects of GSM modulated radiofrequency fields on human immune cells	Tuschl H, Novak W, Molla-Djafari H.	2006-04-01	No Effect	Pulsed	Real		Mobile Phone GSM	https://www.ncbi.nlm.nih.gov/pubmed/16342197	UHF (300 MHz-3 GHz) studies	National Occupation Hazard Insurance Association, Vienna, Austria.	1	0
2261	Evaluation of HSP70 expression and DNA damage in cells of a human trophoblast cell line exposed to 1.8 GHz amplitude-modulated radiofrequency fields	Valbonesi P, Franzellitti S, Piano A, Contin A, Biondi C, Fabbri E.	2008-03-01	No Effect	Pulsed	Simulated		Mobile Phone GSM Simulated	https://www.emf-portal.org/en/article/15699	UHF (300 MHz-3 GHz) studies	Italian Ministry of University and Scientific Research Funds for the purchase of the high-frequency EMF exposure system were provided by the Fondazione Flaminia (Ravenna),	1	0
2262	HSP27 phosphorylation increases after 45 degrees C or 41 degrees C heat shocks but not after non-thermal TDMA or GSM exposures	Vanderwaal RP, Cha B, Moros EG, Roti Roti JL.	2006-09-09	No Effect	Pulsed	Simulated		Mobile Phone TDMA Simulated	https://www.ncbi.nlm.nih.gov/pubmed/16971370	UHF (300 MHz-3 GHz) studies	Mobile Manufacturers Forum (MMF) & National Cancer Institute of the US Department of Health and Human Services.	1	0
2264	Chromosome damage and micronucleus formation in human blood lymphocytes exposed in vitro to radiofrequency radiation at a cellular telephone frequency (847.74 MHz, CDMA)	Vijayalaxmi, Bisht KS, Pickard WF, Meltz ML, Roti Roti JL, Moros EG.	2001-10-01	No Effect	Pulsed	Simulated		Mobile Phone CDMA Simulated	https://www.emf-portal.org/en/article/7827	UHF (300 MHz-3 GHz) studies	United States Air Force Office of Scientific Research Grant & Dr. Bisht’s salary Motorola.	1	0
2265	Cytogenetic studies in human blood lymphocytes exposed in vitro to radiofrequency radiation at a cellular telephone frequency (835.62 MHz, FDMA)	Vijayalaxmi, Leal BZ, Meltz ML, Pickard WF, Bisht KS, Roti Roti JL, Straube WL, Moros EG.	2001-01-01	No Effect	Continuous	Simulated		Mobile Phone FDMA Simulated	https://www.emf-portal.org/en/article/5187	UHF (300 MHz-3 GHz) studies	United States Air Force Office of Scientific Research Grant & Dr. Bisht’s salary Motorola.	1	0
2266	Primary DNA damage in human blood lymphocytes exposed in vitro to 2450 MHz radiofrequency radiation	Vijayalaxmi, Leal BZ, Szilagyi M, Prihoda TJ, Meltz ML.	2000-04-01	No Effect	Pulsed			RF Signal Generator	https://www.ncbi.nlm.nih.gov/pubmed/10761010	UHF (300 MHz-3 GHz) studies	This work was supported by the U.S. Air Force Office of Scientific Research grant no. F49620-98-1-0419.	1	0
2269	Intensity-dependent effects of microwave electromagnetic fields on acetylcholinesterase activity and protein conformation in frog skeletal muscles	Vukova T, Atanassov A, Ivanov R, Radicheva N.	2005-02-01	Effect	Continuous			RF Signal Generator	https://www.emf-portal.org/en/article/11610	UHF (300 MHz-3 GHz) studies	Not Stated	1	0
2270	Influence of GSM Signals on Human Peripheral Lymphocytes: Study of Genotoxicity	Waldmann P, Bohnenberger S, Greinert R, Hermann-Then B, Heselich A, Klug SJ, Koenig J, Kuhr K, Kuster N, Merker M, Murbach M, Pollet D, Schadenboeck W, Scheidemann-Wesp U, Schwab B, Volkmer B, Weyer V, Blettner M.	2013-02-01	Uncertain Effect	Pulsed	Simulated		Mobile Phone GSM Simulated	https://www.emf-portal.org/en/article/21641	UHF (300 MHz-3 GHz) studies	Federal Office for Radiation Protection, Salzgitter, Germany	1	0
2271	Effects of a 2450 MHz high-frequency electromagnetic field with a wide range of SARs on the induction of heat-shock proteins in A172 cells	Wang J, Koyama S, Komatsubara Y, Suzuki Y, Taki M, Miyakoshi J.	2006-04-18	Effect	Continuous			RF Signal Generator	https://www.ncbi.nlm.nih.gov/pubmed/16622864	UHF (300 MHz-3 GHz) studies	Ministry of Internal Affairs of Communication, Japan.	1	0
2272	Effects of 2450 MHz electromagnetic fields with a wide range of SARs on methylcholanthrene-induced transformation in C3H10T1/2 cells	Wang J, Sakurai T, Koyama S, Komatubara Y, Suzuki Y, Taki M, Miyakoshi J.	2005-09-01	Effect	Continuous			RF Signal Generator	https://www.emf-portal.org/en/article/12645	UHF (300 MHz-3 GHz) studies	Ministry of Internal Affairs and Communications, Japan	1	0
2273	Effects of different dose microwave radiation on protein components of cultured rabbit lens	Wang KJ, Yao K, Lu DQ.	2007-04-01	Effect	Not Stated			RF Signal Generator	https://www.ncbi.nlm.nih.gov/pubmed/17535651	UHF (300 MHz-3 GHz) studies	Not Known	1	0
2274	Global gene response to GSM 1800 MHz radiofrequency electromagnetic field in MCF-7 cells	Wang LL, Chen GD, Lu DQ, Chiang H, Xu ZP.	2006-05-01	Uncertain Effect	Pulsed			Mobile Phone GSM Simulated	https://www.ncbi.nlm.nih.gov/pubmed/16836876	UHF (300 MHz-3 GHz) studies	Not Known	1	0
2276	Effect of 900 MHz electromagnetic fields on the expression of GABA receptor of cerebral cortical neurons in postnatal rats	Wang Q, Cao ZJ, Bai XT.	2005-09-01	Effect	Continuous			Microwave	https://www.ncbi.nlm.nih.gov/pubmed/16329593	UHF (300 MHz-3 GHz) studies	Not Known	1	0
2279	Expression of the proto-oncogene Fos after exposure to radiofrequency radiation relevant to wireless communications	Whitehead TD, Brownstein BH, Parry JJ, Thompson D, Cha BA, Moros EG, Rogers BE, Roti Roti JL.	2005-10-01	No Effect	Pulsed	Simulated		Mobile Phone CDMA Simulated	https://www.emf-portal.org/en/article/12606	UHF (300 MHz-3 GHz) studies	Motorola & Air Force Office of Scientific Research/Department of Defense Multidisciplinary University Research Initiative (AFOSR/DOD MURI), USA & Air Force Office of Scientific Research (AFOSR), USA Department of Defense (DoD), USA	1	0
2280	Gene expression does not change significantly in C3H 10T(1/2) cells after exposure to 847.74 CDMA or 835.62 FDMA radiofrequency radiation	Whitehead TD, Moros EG, Brownstein BH, Roti Roti JL.	2006-06-01	No Effect	Pulsed	Real		Mobile Phone CDMA	https://www.emf-portal.org/en/article/13898	UHF (300 MHz-3 GHz) studies	Motorola Corporation and in part by (MURI-02) Subcellular Response to Narrowband and Wideband Radiofrequency Radiation, administered by Old Dominion University (AFOSR F49620-02-10320)	1	0
2281	The number of genes changing expression after chronic exposure to code division multiple access or frequency DMA radiofrequency radiation does not exceed the false-positive rate	Whitehead TD, Moros EG, Brownstein BH, Roti Roti JL.	2006-08-25	No Effect	Pulsed	Real		Mobile Phone CDMA	https://www.emf-portal.org/en/article/14117	UHF (300 MHz-3 GHz) studies	Not Stated	1	0
2283	Differential damage in bacterial cells by microwave radiation on the basis of cell wall structure	Woo IS, Rhee IK, Park HD.	2000-05-01	Effect	Not Stated			Microwave Oven	https://www.emf-portal.org/en/article/4339	UHF (300 MHz-3 GHz) studies	LG Electronics Inc., Korea	1	0
2287	Blocking 1800 MHz mobile phone radiation-induced reactive oxygen species production and DNA damage in lens epithelial cells by noise magnetic fields	Wu W, Yao K, Wang KJ, Lu DQ, He JL, Xu LH, Sun WJ.	2008-01-01	Effect	Pulsed	Real	1	Mobile Phone GSM	https://www.ncbi.nlm.nih.gov/pubmed/18275117	UHF (300 MHz-3 GHz) studies	Not Known	1	0
2288	Chronic exposure to GSM 1800-MHz microwaves reduces excitatory synaptic activity in cultured hippocampal neurons	Xu S, Ning W, Xu Z, Zhou S, Chiang H, Luo J.	2006-05-08	Effect	Pulsed	Simulated		Mobile Phone GSM Simulated	https://www.emf-portal.org/en/article/16020	UHF (300 MHz-3 GHz) studies	National Natural Science Foundation (NSFC), China , Zhejiang Provincial Natural Science Foundation, China & Ministry of Education, China	1	0
2291	Cellular Neoplastic Transformation Induced by 916 MHz Microwave Radiation	Yang L, Hao D, Wang M, Zeng Y, Wu S, Zeng Y.	2012-03-07	Effect	Continuous			Microwave	https://www.emf-portal.org/en/article/20356	UHF (300 MHz-3 GHz) studies	National Basic Research Program of China & Fundamental Research Fund for the Beijing Municipal Education Commission Science and Technology Innovation Platform & Research Program of Beijing Municipal Commission of Education, China	1	0
2294	Low power microwave radiation inhibits the proliferation of rabbit lens epithelial cells by upregulating P27Kip1 expression	Yao K, Wang KJ, Sun ZH, Tan J, Xu W, Zhu LJ, Lu DQ.	2004-02-25	Effect	Continuous			Microwave	https://www.emf-portal.org/en/article/12449	UHF (300 MHz-3 GHz) studies	Zhejiang Provincial Natural Science Foundation, China & Zhejiang Provincial Health Bureau, China	1	0
2295	Electromagnetic noise inhibits radiofrequency radiation-induced DNA damage and reactive oxygen species increase in human lens epithelial cells	Yao K, Wu W, Wang K, Ni S, Ye P, Yu Y, Ye J, Sun L.	2008-05-19	Effect	Pulsed	Simulated	1	Mobile Phone GSM Simulated	https://www.ncbi.nlm.nih.gov/pubmed/18509546	UHF (300 MHz-3 GHz) studies	National Natural Science Foundation of China and the Zhejiang Provincial Natural Science Foundation of China	1	0
2298	Effects of global system for mobile communications 1800 MHz radiofrequency electromagnetic fields on gene and protein expression in MCF-7 cells	Zeng Q, Chen G, Weng Y, Wang L, Chiang H, Lu D, Xu Z.	2006-08-03	Uncertain Effect	Pulsed	Real		Mobile Phone GSM	https://www.emf-portal.org/en/article/14053	UHF (300 MHz-3 GHz) studies	National Natural Science Foundation of China, the Key Project of the Chinese Ministry of Education.	1	0
2299	Lack of genotoxic effects (micronucleus induction) in human lymphocytes exposed in vitro to 900 MHz electromagnetic fields	Zeni O, Chiavoni AS, Sannino A, Antolini A, Forigo D, Bersani F, Scarfì MR.	2003-08-01	No Effect	Pulsed	Simulated		Mobile Phone GSM Simulated	https://www.ncbi.nlm.nih.gov/pubmed/12859225	UHF (300 MHz-3 GHz) studies	TIM—Telecom Italia Mobile.	1	0
2300	Formation of reactive oxygen species in L929 cells after exposure to 900 MHz RF radiation with and without co-exposure to 3-chloro-4-(dichloromethyl)-5-hydroxy-2(5H)-furanone	Zeni O, Di Pietro R, d'Ambrosio G, Massa R, Capri M, Naarala J, Juutilainen J, Scarfi MR.	2007-03-01	Effect	Continuous	Simulated	1	Mobile Phone GSM Simulated	https://www.emf-portal.org/en/article/14552	UHF (300 MHz-3 GHz) studies	European Union (EU)/European Commission & CEMFEC ((EU program "Combined Effects of Electromagnetic Fields with Environmental Carcinogens")	1	0
2301	Evaluation of genotoxic effects in human peripheral blood leukocytes following an acute in vitro exposure to 900 MHz radiofrequency fields	Zeni O, Romanò M, Perrotta A, Lioi MB, Barbieri R, d'Ambrosio G, Massa R, Scarfì MR.	2005-04-14	No Effect	Pulsed	Simulated		Mobile Phone TDMA Simulated	https://www.ncbi.nlm.nih.gov/pubmed/15832336	UHF (300 MHz-3 GHz) studies	Italian Ministry of University and Scientific Research, Project ‘‘Salvaguardia dell’uomo e dell’ambiente dalle emissioni elettromagnetiche’’	1	0
2302	Induction of an adaptive response in human blood lymphocytes exposed to radiofrequency fields: Influence of the universal mobile telecommunication system (UMTS) signal and the specific absorption rate	Zeni O, Sannino A, Romeo S, Massa R, Sarti M, Reddy AB, Prihoda TJ, Vijayalaxmi, Scarfì MR.	2012-08-30	Effect	Pulsed	Simulated		UMTS simulated	https://www.ncbi.nlm.nih.gov/pubmed/22525361	UHF (300 MHz-3 GHz) studies	No Conflict of Interest Stated	1	0
2303	Evaluation of genotoxic effects in human leukocytes after in vitro exposure to 1950 MHz UMTS radiofrequency field	Zeni O, Schiavoni A, Perrotta A, Forigo D, Deplano M, Scarfi MR.	2007-11-20	No Effect	Pulsed	Simulated		UMTS simulated	https://www.emf-portal.org/en/article/15373	UHF (300 MHz-3 GHz) studies	Not Stated	1	0
2306	Effects of 2,450 MHz microwave on DNA damage induced by three chemical mutagens in vitro	Zhang MB, Jin LF, He JL, Hu J, Zheng W.	2003-08-01	Effect	Not Stated			Microwave	https://www.ncbi.nlm.nih.gov/pubmed/14761437	UHF (300 MHz-3 GHz) studies	Not Known	1	0
2309	Studying gene expression profile of rat neuron exposed to 1800MHz radiofrequency electromagnetic fields with cDNA microassay	Zhao R, Zhang S, Xu Z, Ju L, Lu D, Yao G.	2007-03-19	Effect	Pulsed	Simulated		Mobile Phone GSM Simulated	https://www.emf-portal.org/en/article/14671	UHF (300 MHz-3 GHz) studies	National Natural Science Foundation (NSFC), China	1	0
2310	Effect of 1.8 GHz radiofrequency electromagnetic fields on the expression of microtubule associated protein 2 in rat neurons	Zhao R, Zhang SZ, Yao GD, Lu DQ, Jiang H, Xu ZP.	2006-04-01	Effect	Pulsed	Simulated		Mobile Phone GSM Simulated	https://www.ncbi.nlm.nih.gov/pubmed/16701035	UHF (300 MHz-3 GHz) studies	Not Known	1	0
2311	Influence of 1.8-GHz (GSM) radiofrequency radiation (RFR) on DNA damage and repair induced by X-rays in human leukocytes in vitro	Zhijian C, Xiaoxue L, Yezhen L, Deqiang L, Shijie C, Lifen J, Jianlin L, Jiliang H.	2009-06-09	Uncertain Effect	Pulsed	Simulated		Mobile Phone GSM Simulated	https://www.emf-portal.org/en/article/17178	UHF (300 MHz-3 GHz) studies	This research work was supported by the National Natural Science Foundation of China (No. 30571547) 2006–2008; The Natural Science Foundation of Zhejiang Province (No. 300434); and; The International Cooperative Foundation of Science-Technique Bureau of Zhejiang Province (No. 012104).	1	0
2312	Impact of 1.8-GHz radiofrequency radiation (RFR) on DNA damage and repair induced by doxorubicin in human B-cell lymphoblastoid cells	Zhijian C, Xiaoxue L, Yezhen L, Shijie C, Lifen J, Jianlin L, Deqiang L, Jiliang H.	2010-01-01	Effect	Pulsed	Simulated		Mobile Phone GSM Simulated	https://www.emf-portal.org/en/article/17623	UHF (300 MHz-3 GHz) studies	National Natural Science Foundation (NSFC), China , Zhejiang Provincial Natural Science Foundation, China International Co-operative Foundation of Science-Technique Bureau of Zhejiang Province, China	1	0
2313	Surface markers and functions of human dendritic cells exposed to mobile phone 1800 MHz electromagnetic fields	Zhou ZD, Zeng QL, Zheng Y, Zhang JB, Chen HY, Lu DQ, Shao CS, Xia DJ.	2008-01-01	Effect	Pulsed	Simulated		Mobile Phone GSM Simulated	https://www.ncbi.nlm.nih.gov/pubmed/18275116	UHF (300 MHz-3 GHz) studies		1	0
2316	Induction of micronuclei in human lymphocytes exposed in vitro to microwave radiation	Zotti-Martelli L, Peccatori M, Scarpato R, Migliore L.	2000-12-20	Effect	Continuous			RF Signal Generator	https://www.ncbi.nlm.nih.gov/pubmed/11113697	UHF (300 MHz-3 GHz) studies	Not Stated	1	0
2324	Micronucleus assay and lymphocyte mitotic activity in risk assessment of occupational exposure to microwave radiation	Garaj-Vrhovac V.	1999-12-01	Effect	Pulsed			Radar	https://www.ncbi.nlm.nih.gov/pubmed/10576101	UHF (300 MHz-3 GHz) studies	Not Stated	1	0
2326	Naltrexone blocks RFR-induced DNA double strand breaks in rat brain cells	Lai H, Carino M, Singh NP.	1997-11-01	Effect	Pulsed			RF Signal Generator	https://www.researchgate.net/publication/220292445_Naltrexone_blocks_RFR-induced_DNA_double_strand_breaks_in_rat_brain_cells	UHF (300 MHz-3 GHz) studies	National Institute of Environmental Health Sciences	0	1
2327	Acute low-intensity microwave exposure increases DNA single-strand breaks in rat brain cells	Lai H, Singh NP.	1995-01-01	Effect	Pulsed			RF Signal Generator	https://www.ncbi.nlm.nih.gov/pubmed/7677797	UHF (300 MHz-3 GHz) studies	National Institute of Environmental Health Sciences	0	1
2328	In vitro cytogenetic effects of 2450 MHz waves on human peripheral blood lymphocytes	Maes A, Verschaeve L, Arroyo A, De Wagter C, Vercruyssen L.	1993-01-01	Effect	Pulsed			RF Signal Generator	https://www.ncbi.nlm.nih.gov/pubmed/8297394	UHF (300 MHz-3 GHz) studies	Not Stated	1	0
2329	Cytogenetic Effects of Microwaves from Mobile Communication Frequencies (954 Mhz)	Maes A, Collier M, Slaets D, Verschaeve L.	2009-07-07	Effect	Pulsed	Simulated		Mobile Phone GSM Simulated	https://www.emf-portal.org/de/article/891	UHF (300 MHz-3 GHz) studies	Not Stated	1	0
2330	DNA damage in Molt-4 T-lymphoblastoid cells exposed to cellular telephone radiofrequency fields in vitro	Phillips JL, Ivaschuk O, Ishida-Jones T, Jones RA, Campbell-Beachler M, Haggren W.	1998-01-09	Effect	Pulsed	Simulated		Mobile Phone Simulated and Transverse Electromagnetic (TEM) Cell	https://www.emf-portal.org/en/article/2112	UHF (300 MHz-3 GHz) studies	U.S. Department of Energy, Contract DE-AI01-95EE34020, and by Motorola.	1	0
2332	Effect of low power microwave on the mouse genome: a direct DNA analysis	Sarkar S, Ali S, Behari J.	1994-01-01	Effect	Continuous			Microwave Signal Generator	https://www.ncbi.nlm.nih.gov/pubmed/7506381	UHF (300 MHz-3 GHz) studies	Defence Research and Developement Organization grant DMBS/48200/INM-222. Military Funded	0	1
2333	Effects of radiofrequency electromagnetic fields on seed germination and root meristematic cells of Allium cepa L	Tkalec M, Malarić K, Pavlica M, Pevalek-Kozlina B, Vidaković-Cifrek Z.	2009-01-31	Effect	Continuous			RF Signal Generator and Gigahertz Transversal Electromagnetic (GTEM)	https://www.ncbi.nlm.nih.gov/pubmed/19028599	UHF (300 MHz-3 GHz) studies	No Conflict of Interest Stated	1	0
2334	Effect of superposed electromagnetic noise on DNA damage of lens epithelial cells induced by microwave radiation	Yao K, Wu W, Yu Y, Zeng Q, He J, Lu D, Wang K.	2008-05-01	Effect	Pulsed	Simulated	1	Mobile Phone GSM Simulated	https://www.ncbi.nlm.nih.gov/pubmed/18436834	UHF (300 MHz-3 GHz) studies	Not Stated	1	0
2335	Effects of high-frequency electromagnetic fields on human lymphocytes in vitro	Antonopoulos A, Eisenbrandt H, Obe G.	1997-12-12	No Effect	Pulsed	Simulated		Mobile Phone GSM Simulated	https://www.ncbi.nlm.nih.gov/pubmed/9465932	UHF (300 MHz-3 GHz) studies	University of Braunschweig, Forschungsgemeinschaft Funk e.V.	1	0
2353	Long-term exposure to 835 MHz RF-EMF induces hyperactivity, autophagy and demyelination in the cortical neurons of mice	Kim JH, Yu DH, Huh YH, Lee EH, Kim HG, Kim HR.	2017-01-20	Effect	Continuous			Simulated by a signal generator	https://www.ncbi.nlm.nih.gov/pubmed/28106136	UHF (300 MHz-3 GHz) studies	National Research Foundation of Korea (NRF) funded by the Ministry of Science, ICT, and Future Planning	0	1
2361	Mobile phone signal exposure triggers a hormesis-like effect in Atm+/+ and Atm-/- mouse embryonic fibroblasts	Sun C, Wei X, Fei Y, Su L, Zhao X, Chen G, Xu Z.	2016-11-01	Effect	Pulsed	Simulated		Mobile Phone GSM Simulated	https://www.ncbi.nlm.nih.gov/pubmed/27857169	UHF (300 MHz-3 GHz) studies	Ministry of Science and Technology and the National Natural Science Foundation of China.	1	0
2362	Effects of exposure to 2100MHz GSM-like radiofrequency electromagnetic field on auditory system of rats	Celiker M, Özgür A, Tümkaya L, Terzi S, Yılmaz M, Kalkan Y, Erdoğan E.	2016-11-01	Effect	Pulsed	Simulated		Mobile Phone GSM (Talk) Simulated	https://www.emf-portal.org/en/article/30628	UHF (300 MHz-3 GHz) studies	No Conflict of Interest Stated	0	1
2363	Evaluation of the Protective Role of Vitamin C on the Metabolic and Enzymatic Activities of the Liver in the Male Rats After Exposure to 2.45 GHz Of Wi-Fi Routers	Shekoohi-Shooli F, Mortazavi SM, Shojaei-Fard MB, Nematollahi S, Tayebi M.	2016-09-01	Effect	Pulsed			WiFi	https://www.ncbi.nlm.nih.gov/pubmed/27853723	UHF (300 MHz-3 GHz) studies	No Conflict of Interest Stated	0	1
2365	Impact of RF EMF on cucumber and tomato plants	Al-Kathiri F, Al-Raisi K, Al-Hinai K, Al-Droushi M, Khan M, Nadir Z.	2016-10-13	Effect	Continuous			Microwave	http://ieeexplore.ieee.org/document/7746234/?reload=true	UHF (300 MHz-3 GHz) studies	Department of agriculture and Sultan Qaboos University	1	0
2366	Report of Partial findings from the National Toxicology Program Carcinogenesis Studies of Cell Phone Radiofrequency Radiation in Hsd: Sprague Dawley® SD rats (Whole Body Exposure)	Wyde M, Cesta M, Blystone C, Elmore S, Foster P, Hooth M, Kissling G, Malarkey D, Sills R, Stout V, Walker N, Witt K, Wolfe M, Bucher J.	2016-05-01	Effect	Pulsed	Simulated		Mobile Phone GSM Simulated	http://biorxiv.org/content/early/2016/05/26/055699	UHF (300 MHz-3 GHz) studies	US National Toxicology Program (NTP)	0	1
2373	Effects on auditory function of chronic exposure to electromagnetic fields from mobile phones	Bhagat S, Varshney S, Bist SS, Goel D, Mishra S, Jha VK.	2016-08-01	No Effect	Pulsed	Real		Mobile Phone	https://www.emf-portal.org/en/article/30190	UHF (300 MHz-3 GHz) studies	Not Stated	0	1
2377	Effects of prenatal exposure to WIFI signal (2.45GHz) on postnatal development and behavior in rat: Influence of maternal restraint	Othman H, Ammari M, Sakly M, Abdelmelek H.	2017-03-10	Effect	Pulsed		1	WiFi	https://www.ncbi.nlm.nih.gov/pubmed/28288806	UHF (300 MHz-3 GHz) studies	Tunisian Ministry of Higher Education and Scientific Research	0	1
2385	Effect of man-made electromagnetic fields on common Brassicaceae Lepidium sativum (cress d’Alinois) seed germination: a preliminary replication study	Cammaerts MC, Johansson O.	2015-01-01	Effect	Pulsed	Real		Mobile Phone & WiFi	http://ppct.caicyt.gov.ar/index.php/phyton/article/view/8118	UHF (300 MHz-3 GHz) studies	No Conflict of Interest Stated	0	1
2397	Radiofrequency electromagnetic radiation from cell phone causes defective testicular function in male Wistar rats	Oyewopo AO, Olaniyi SK, Oyewopo CI, Jimoh AT.	2017-03-01	Effect	Pulsed	Real	1	Mobile Phone GSM	https://www.ncbi.nlm.nih.gov/pubmed/28261838	UHF (300 MHz-3 GHz) studies	No Conflict of Interest Stated	0	1
2410	Adaptive Response Induced by Pre-Exposure to 915 MHz Radiofrequency: A Possible Role for Antioxidant Enzyme Activity	Mortazavi SMJ, Mostafavi-Pour Z, Daneshmand M, Zal F, Zare R, Mosleh-Shirazi MA	2017-06-01	Effect	Pulsed	Simulated	1	Mobile Phone GSM Simulated	https://www.ncbi.nlm.nih.gov/pubmed/28580335	UHF (300 MHz-3 GHz) studies	grant No. 91-6234 from the of office of Vice Chancellor for Research and the Center for Research on Protection against Ionizing and Non-Ionizing Radiation	0	1
2411	Acute Neuroinflammation Promotes Cell Responses to 1800 MHz GSM Electromagnetic Fields in the Rat Cerebral Cortex	Lameth J, Gervais A, Colin C, Lévêque P, Jay TM, Edeline JM, Mallat M.	2017-06-03	Effect	Pulsed	Simulated		Mobile Phone Simulated	https://www.ncbi.nlm.nih.gov/pubmed/28578480	UHF (300 MHz-3 GHz) studies	French National Research Program for Environmental and Occupational Health of ANSES (grants 2013/2/03 and 2015/2 RF/12), a grant from Institut National de l’Environnement et des Risques (INERIS, DRC-13-135967- 08716A), and funding from the program “Investissements d’avenir” ANR-10-IAIHU-06.	0	1
2415	Sensitivity of spiral ganglion neurons to damage caused by mobile phone electromagnetic radiation will increase in lipopolysaccharide-induced inflammation in vitro model	Zuo WQ, Hu YJ, Yang Y, Zhao XY, Zhang YY, Kong W, Kong WJ.	2015-05-29	Effect	Pulsed	Simulated	1	Mobile Phone GSM (Talk) Simulated	https://www.ncbi.nlm.nih.gov/pubmed/26022358	UHF (300 MHz-3 GHz) studies	Major State Basic Research Development Program of China , the National Nature Science Foundation of China Authors thank the department of Occupational Health in Third Military Medical University of China for providing the SXc-1800 MHz system	1	0
2416	Mobile phone radiation alters proliferation of hepatocarcinoma cells	Ozgur E, Guler G, Kismali G, Seyhan N.	2014-11-01	Effect	Pulsed	Simulated		Mobile Phone GSM Simulated	https://www.ncbi.nlm.nih.gov/pubmed/24817642	UHF (300 MHz-3 GHz) studies	No Conflict of Interest Stated	1	0
2418	Influence of radiofrequency-electromagnetic waves from 3rd-generation cellular phones on fertilization and embryo development in mice	Suzuki S, Okutsu M, Suganuma R, Komiya H, Nakatani-Enomoto S, Kobayashi S, Ugawa Y, Tateno H, Fujimori K.	2017-06-19	No Effect	Pulsed	Simulated		Mobile Phone GSM Simulated	https://www.ncbi.nlm.nih.gov/pubmed/28628221	UHF (300 MHz-3 GHz) studies	Not Stated	1	0
2427	Effect of mobile phone usage time on total antioxidant capacity of saliva and salivary immunoglobulin a	Arbabi-Kalati F, Salimi S, Vaziry-Rabiee A, Noraeei M.	2014-04-01	Effect	Pulsed	Real	1	Mobile Phone	https://www.ncbi.nlm.nih.gov/pubmed/26005658	UHF (300 MHz-3 GHz) studies	Not Stated	0	1
2430	The radioprotective effects of Moringa oleifera against mobile phone electromagnetic radiation-induced infertility in rats	Bin-Meferij MM, El-Kott AF.	2015-08-01	Effect	Pulsed	Real	1	Mobile Phone GSM	https://www.ncbi.nlm.nih.gov/pubmed/26550159	UHF (300 MHz-3 GHz) studies	Abdulrahman University, Saudi Arabia, for the financial support for complete this study	0	1
2433	Protective effects of β-glucan against oxidative injury induced by 2.45-GHz electromagnetic radiation in the skin tissue of rats	Ceyhan AM, Akkaya VB, Güleçol ŞC, Ceyhan BM, Özgüner F, Chen W.	2012-01-12	Effect	Pulsed	Simulated	1	WiFi Simulated	https://www.ncbi.nlm.nih.gov/pubmed/22237725	UHF (300 MHz-3 GHz) studies	Not Stated	0	1
2435	Neuroprotective effects of melatonin and omega-3 on hippocampal cells prenatally exposed to 900 MHz electromagnetic fields	Erdem Koc G, Kaplan S, Altun G, Gümüs H, Gülsüm Deniz O, Aydin I, Emin Onger M, Altunkaynak Z.	2016-07-21	Effect	Continuous			Microwave	https://www.emf-portal.org/en/article/29922	UHF (300 MHz-3 GHz) studies	University of Ondokuz Mayis, Samsun, Turkey	0	1
2436	Effects of cell phone radiation on lipid peroxidation, glutathione and nitric oxide levels in mouse brain during epileptic seizure	Esmekaya MA, Tuysuz MZ, Tomruk A, Canseven AG, Yucel E, Aktuna Z, Keskil S, Seyhan N.	2016-09-01	Effect	Pulsed	Simulated	1	Mobile Phone GSM Simulated	https://www.emf-portal.org/en/article/28763	UHF (300 MHz-3 GHz) studies	Gazi University Research Foundation, Turkey	0	1
2437	Response of Caenorhabditis elegans to wireless devices radiation exposure	Fasseas MK, Fragopoulou AF, Manta AK, Skouroliakou A, Vekrellis K, Margaritis LH, Syntichaki P.	2015-03-01	No Effect	Pulsed	Real		DECT Phone	https://www.emf-portal.org/en/article/26224	UHF (300 MHz-3 GHz) studies	European Union (EU)/European Commission THALES Programme	0	1
2438	Effects of chronic exposure to 950 MHz ultra-high-frequency electromagnetic radiation on reactive oxygen species metabolism in the right and left cerebral cortex of young rats of different ages	Furtado-Filho OV, Borba JB, Maraschin T, Souza LM, Henriques JA, Moreira JC, Saffi J.	2015-08-01	Effect	Continuous		1	RF Signal Generator	https://www.ncbi.nlm.nih.gov/pubmed/26272641	UHF (300 MHz-3 GHz) studies	Brazilian financial agencies CNPq (grant number 308065/2010-7) Ministry of Science and Technology, FAPERGS (grant number 10/0044-3) Government and FINEP (grant number 04.11.0174.00) Ministry of Science. The lead author is connected to the Military School of Porto Alegre, Brazilian Army	0	1
2439	Influence of non ionizing radiation of base stations on the activity of redox proteins in bovines	Hässig M, Wullschleger M, Naegeli HP, Kupper J, Spiess B, Kuster N, Capstick M, Murbach M	2014-06-01	Effect	Pulsed	Real	1	Mobile Phone Base Station	https://www.emf-portal.org/en/article/25180	UHF (300 MHz-3 GHz) studies	Federal Office of the Environment (FOEN; Bundesamt für Umwelt), Switzerland	0	1
2440	2100-MHz electromagnetic fields have different effects on visual evoked potentials and oxidant/antioxidant status depending on exposure duration	Hidisoglu E, Kantar Gok D, Er H, Akpinar D, Uysal F, Akkoyunlu G, Ozen S, Agar A, Yargicoglu P	2016-03-15	Effect	Pulsed	Simulated	1	Mobile Phone GSM Simulated	https://www.emf-portal.org/en/article/28656	UHF (300 MHz-3 GHz) studies	Akdeniz University Research Foundation, Turkey	0	1
2442	Morphological and antioxidant impairments in the spinal cord of male offspring rats following exposure to a continuous 900-MHz electromagnetic field during early and mid-adolescence	Ikinci A, Mercantepe T, Unal D, Erol HS, Sahin A, Aslan A, Bas O, Erdem H, Sonmez OF, Kaya H, Odaci E.	2016-09-01	Effect	Continuous	Simulated	1	Mobile Phone GSM Simulated	https://www.ncbi.nlm.nih.gov/pubmed/26708410	UHF (300 MHz-3 GHz) studies	Not Stated	0	1
2447	Exposure to 1800MHz Radiofrequency Electromagnetic Radiation Induces Oxidative DNA Base Damage in a Mouse Spermatocyte-Derived Cell Line	Liu C, Duan W, Xu S, Chen C, He M, Zhang L, Yu Z, Zhou Z.	2013-03-27	Effect	Pulsed	Simulated	1	Mobile Phone GSM Simulated	https://www.emf-portal.org/en/article/21674	UHF (300 MHz-3 GHz) studies	National Basic Research Program of China & National Natural Science Foundation (NSFC), China	1	0
2454	Neurobehavioural Changes and Brain Oxidative Stress Induced by Acute Exposure to GSM900 Mobile Phone Radiations in Zebrafish (Danio rerio)	Nirwane A, Sridhar V, Majumdar A.	2016-04-30	Effect	Pulsed	Real	1	Mobile Phone GSM	https://www.emf-portal.org/en/article/29387	UHF (300 MHz-3 GHz) studies	Not Stated	0	1
2458	Postnatal development and behavior effects of in-utero exposure of rats to radiofrequency waves emitted from conventional WiFi devices	Othman H, Ammari M, Rtibi K, Bensaid N, Sakly M, Abdelmelek H.	2017-06-01	Effect	Pulsed	Real	1	WiFi	https://www.ncbi.nlm.nih.gov/pubmed/28458069	UHF (300 MHz-3 GHz) studies	Tunisian Ministry of Higher Education and Scientific Research	0	1
2459	Radiofrequency radiation (900 MHz)-induced DNA damage and cell cycle arrest in testicular germ cells in swiss albino mice	Pandey N, Giri S, Das S, Upadhaya P.	2016-10-14	Effect	Pulsed	Simulated		Mobile Phone GSM Simulated	https://www.ncbi.nlm.nih.gov/labs/articles/27738269/	UHF (300 MHz-3 GHz) studies	University Grants Commission for providing fellowship support to NP and Department of Science and Technology-Fund for Improvement of Science and Technology for Institutional Infrastructure	0	1
2460	The 2100MHz radiofrequency radiation of a 3G-mobile phone and the DNA oxidative damage in brain	Sahin D, Ozgur E, Guler G, Tomruk A, Unlu I, Sepici-Dincel A, Seyhan N.	2016-09-01	Effect	Pulsed	Simulated	1	Mobile Phone GSM Simulated	https://www.emf-portal.org/en/article/28658	UHF (300 MHz-3 GHz) studies	Not Stated	0	1
2462	2.45-GHz microwave irradiation adversely affects reproductive function in male mouse, Mus musculus by inducing oxidative and nitrosative stress	Shahin S, Mishra V, Singh SP, Chaturvedi CM.	2014-05-01	Effect	Continuous		1	RF Signal Generator	https://www.ncbi.nlm.nih.gov/pubmed/24490664	UHF (300 MHz-3 GHz) studies	Indian Council of Medical Research	0	1
2463	Effect of cell phone use on salivary total protein, enzymes and oxidative stress markers in young adults: a pilot study	Shivashankara AR, Joy J, Sunitha V, Rai MP, Rao S, Nambranathayil S, Baliga MS.	2015-02-01	Effect	Pulsed	Real	1	Mobile Phone GSM	https://www.ncbi.nlm.nih.gov/pubmed/25859446	UHF (300 MHz-3 GHz) studies	Not Stated	0	1
2464	Effect of cell phone-like electromagnetic radiation on primary human thyroid cells	Silva V, Hilly O, Strenov Y, Tzabari C, Hauptman Y, Feinmesser R.	2015-12-21	No Effect	Continuous			RF Signal Generator	https://www.ncbi.nlm.nih.gov/pubmed/26689947	UHF (300 MHz-3 GHz) studies	No Conflict of Interest Stated	1	0
2465	Mitochondrial DNA damage and oxidative damage in HL-60 cells exposed to 900MHz radiofrequency fields	Sun Y, Zong L, Gao Z, Zhu S, Tong J, Cao Y.	2017-03-01	Effect	Continuous		1	RF Signal Generator and a Gigahertz Transverse Electromagnetic Cell	https://www.ncbi.nlm.nih.gov/pubmed/28340409	UHF (300 MHz-3 GHz) studies	National Natural Science Foundation of China	1	0
2466	Influence of 400, 900, and 1900 MHz electromagnetic fields on Lemna minor growth and peroxidase activity	Tkalec M, Malarić K, Pevalek-Kozlina B.	2005-03-14	Effect	Continuous			Transverse Electromagnetic (TEM) Cell	https://www.ncbi.nlm.nih.gov/pubmed/15768427	UHF (300 MHz-3 GHz) studies	The Ministry of Science and Technology of the Republic of Croatia	0	1
2469	The Compound Chinese Medicine “Kang Fu Ling” Protects against High Power Microwave-Induced Myocardial Injury	Zhang X, Gao Y, Dong J, Wang S, Yao B, Zhang J, Hu S, Xu X, Zuo H, Wang L, Zhou H, Zhao L,	2014-07-03	Effect	Continuous		1	Microwave	https://www.ncbi.nlm.nih.gov/pmc/articles/PMC4081591/	UHF (300 MHz-3 GHz) studies	National Science and Technology Major Project of the Ministry of science and Technology of China	0	1
2470	The apoptotic effect and the plausible mechanism of microwave radiation on rat myocardial cells	Zhu W, Cui Y, Feng X, Li Y, Zhang W, Xu J, Wang H, Lv S.	2016-03-06	Effect	Continuous		1	Microwave	https://www.ncbi.nlm.nih.gov/pubmed/27203380	UHF (300 MHz-3 GHz) studies	National Natural Science Foundation of China and the National Science and Technology Major Projects Research Program supported by Health and Family Planning Commission of Jilin Province	0	1
2471	Effects of radiofrequency exposure emitted from a GSM mobile phone on proliferation, differentiation, and apoptosis of neural stem cells	Eghlidospour M, Ghanbari A, Mortazavi MJ, Azai H.	2017-06-01	Effect	Pulsed	Simulated		Mobile Phone GSM Simulated	https://www.ncbi.nlm.nih.gov/m/pubmed/28713615/	UHF (300 MHz-3 GHz) studies	Shiraz University of Medical Sciences	1	0
2473	Analysis of gene expression in mouse brain regions after exposure to 1.9 GHz radiofrequency fields	McNamee JP, Bellier PV, Konkle AT, Thomas R, Wasoontarajaroen S, Lemay E, Gajda GB.	2016-06-01	No Effect	Pulsed			Microwave	https://www.ncbi.nlm.nih.gov/pubmed/27028625	UHF (300 MHz-3 GHz) studies	No Conflict of Interest Stated	0	1
2512	GSM-like radiofrequency exposure induces apoptosis via caspase-dependent pathway in infant rabbits	Meral O, Ozgur E, Kismali G, Guler G, Alpay M, Sel T, Seyhan N.	2016-11-22	Effect	Pulsed	Simulated		Mobile Phone GSM Simulated	https://www.ncbi.nlm.nih.gov/pubmed/28125894	UHF (300 MHz-3 GHz) studies	Not Stated	0	1
2536	Adaptive response in mouse bone marrow stromal cells exposed to 900MHz radiofrequency fields: Impact of poly (ADP-ribose) polymerase (PARP)	He Q, Zong L, Sun Y, Vijayalaxmi, Prihoda TJ, Tong J, Cao Y.	2017-05-17	Effect	Continuous			RF Signal Generator and a Gigahertz Transverse Electromagnetic (GTEM)	https://www.ncbi.nlm.nih.gov/pubmed/28676262	UHF (300 MHz-3 GHz) studies	National Natural Science Foundation of China	1	0
2559	In vitro non-thermal oxidative stress response after 1800 MHz radiofrequency radiation	Marjanovic Cermak AM, Pavicic I, Tariba Lovakovic B, Pizent A, Trosic I.	2017-08-01	Effect	Pulsed			Transverse Electromagnetic (TEM) Cell	https://www.ncbi.nlm.nih.gov/pubmed/28836500	UHF (300 MHz-3 GHz) studies	Ministry of Science, Education and Sports, Republic of Croatia	1	0
2655	Effect of Radiofrequency Radiation Emitted from 2G and 3G Cell Phone on Developing Liver of Chick Embryo - A Comparative Study	D'Silva MH, Swer RT, Anbalagan J, Rajesh B.	2017-07-01	Effect	Pulsed	Real		Mobile Phone 2G GSM	https://www.ncbi.nlm.nih.gov/pmc/articles/PMC5583901/	UHF (300 MHz-3 GHz) studies	Not Stated	0	1
2662	The response of human bacteria to static magnetic field and radiofrequency electromagnetic field	Crabtree DPE, Herrera BJ, Kang S.	2017-09-28	Effect	Continuous			SMF Static Magnetic Field	https://www.ncbi.nlm.nih.gov/pubmed/28956351	SMF Static Magnet Field studies UHF (300 MHz-3 GHz) studies	Baylor University Office of Research and College of Arts & Sciences.	1	0
2670	Effects of electromagnetic waves emitted from 3G+wi-fi modems on human semen analysis	Kamali K, Atarod M, Sarhadi S, Nikbakht J, Emami M, Maghsoudi R, Salimi H, Fallahpour B, Kamali N, Momtazan A, Ameli M	2017-09-14	Effect	Pulsed	Real		3G Wi-Fi Modem	https://www.ncbi.nlm.nih.gov/pubmed/28967061	UHF (300 MHz-3 GHz) studies	No Conflict of Interest Stated No Financial support for the research	1	0
2686	Cellphone electromagnetic radiation damages the testicular ultrastructure of male rats	Gao XH, Hu HR, Ma XL, Chen J, Zhang GH.	2016-06-01	Effect	Pulsed	Real		Mobile Phone	https://www.ncbi.nlm.nih.gov/pubmed/28963835	UHF (300 MHz-3 GHz) studies	Not Known	0	1
2689	Evaluation of the mobile phone electromagnetic radiation on serum iron parameters in rats	Cetkin M, Demirel C, Kızılkan N, Aksoy N, Erbağcı H.	2017-03-01	Effect	Pulsed	Real		Mobile Phone GSM (Talk)	https://www.ncbi.nlm.nih.gov/pubmed/29026392	UHF (300 MHz-3 GHz) studies	No Conflict of Interest Stated	0	1
2693	An Experimental Study of the Effects of Combined Exposure to Microwave and Heat on Gene Expression and Sperm Parameters in Mice	Gohari FA, Saranjam B, Asgari M, Omidi L, Ekrami H, Moussavi-Najarkola SA.	2017-04-01	Effect	Pulsed			Microwave	https://www.ncbi.nlm.nih.gov/pubmed/28904503	UHF (300 MHz-3 GHz) studies	No funding was received in support of this work	0	1
2694	RAPD Profiling, DNA Fragmentation, and Histomorphometric Examination in Brains of Wistar Rats Exposed to Indoor 2.5 Ghz Wi-Fi Devices Radiation	Ibitayo AO, Afolabi OB, Akinyemi AJ, Ojiezeh TI, Adekoya KO, Ojewunmi OO.	2017-08-20	Effect	Pulsed	Real		WiFi	https://www.ncbi.nlm.nih.gov/pubmed/28904975	UHF (300 MHz-3 GHz) studies	No Conflict of Interest Stated	0	1
2699	Reduced growth of soybean seedlings after exposure to weak microwave radiation from GSM 900 mobile phone and base station	Halgamuge MN, Yak SK, Eberhardt JL.	2015-02-01	Effect	Pulsed	Simulated		Mobile Phone GSM Simulated	https://www.ncbi.nlm.nih.gov/pubmed/25644316	UHF (300 MHz-3 GHz) studies	Not Stated	0	1
2702	Micronuclei Formation and 8-Hydroxy-2-Deoxyguanosine Enzyme Detection in Ovarian Tissues After Radiofrequency Exposure at 1800 MHz in Adult Sprague–Dawley Rats	Alchalabi ASH, AbdulMalek HRMF, Aklilu E, Aziz AR, Ronald SH, Khan MA.	2017-09-01	Effect	Pulsed	Simulated	1	Mobile Phone GSM Simulated	http://www.sciencedirect.com/science/article/pii/S1978301917301754	UHF (300 MHz-3 GHz) studies	Faculty of Veterinary Medicine of Universiti Malaysia Kelantan.	0	1
2716	Biological effects of cell-phone radiofrequency waves exposure on fertilization in mice; an in vivo and in vitro study	Fatehi D, Anjomshoa M, Mohammadi M, Seify M, Rostamzadeh A.	2017-10-11	Effect	Pulsed	Simulated		Mobile Phone GSM (Stand By)	http://www.sciencedirect.com/science/article/pii/S1110569017301875	UHF (300 MHz-3 GHz) studies	Research & Technology of the SKUMS for financial support. Shahrekord University of Medical Sciences (SKUMS),	0	1
2721	Electromagnetic fields at a mobile phone frequency (900 MHz) trigger the onset of general stress response along with DNA modifications in Eisenia fetida earthworms	Bourdineaud JP, Šrut M, Štambuk A, Tkalec M, Brèthes D, Malarić K, Klobučar GIV.	2017-06-27	Effect	Continuous			RF Signal Generator and Transverse Electromagetic (TEM) Cell	https://www.ncbi.nlm.nih.gov/pubmed/28665795	UHF (300 MHz-3 GHz) studies	Not Stated	0	1
2727	Effect of Exposure to Electromagnetic Fields (Emfs) on Monoamine Neurotransmitters of Newborn Rats	Ismail SA, Ali RFM, Hassan HMM, Abd El-Rahman D.	2015-01-01	Effect	Pulsed	Real		Mobile Phone 2G/3G GSM	https://www.omicsonline.org/open-access/effect-of-exposure-to-electromagnetic-fields-emfs-on-monoamine-neurotransmitters-of-newborn-rats-2168-9652-1000156.pdf	UHF (300 MHz-3 GHz) studies	No stated	0	1
2732	Effects of 1.8 GHz Radiofrequency Fields on the Emotional Behavior and Spatial Memory of Adolescent Mice	Zhang JP, Zhang KY, Guo L, Chen QL, Gao P, Wang T, Li J, Guo GZ, Ding GR.	2017-11-05	Effect	Not Stated			Microwave	https://www.ncbi.nlm.nih.gov/pubmed/29113072	UHF (300 MHz-3 GHz) studies	National Natural Science Foundation of China and the Special Fund from People’s Liberation Army of China (PLA) of China (Military)	0	1
2733	Rats exposed to 2.45GHz of non-ionizing radiation exhibit behavioral changes with increased brain expression of apoptotic caspase 3	Varghese R, Majumdar A, Kumar G, Shukla A.	2017-11-14	Effect	Not Stated		1	RF Signal Generator	https://www.ncbi.nlm.nih.gov/pubmed/29153770	UHF (300 MHz-3 GHz) studies	post graduate scholarship scheme provided by AICTE	0	1
2736	Effects of GSM and UMTS mobile telephony signals on neuron degeneration and blood-brain barrier permeation in the rat brain	Poulletier de Gannes F, Masuda H, Billaudel B, Poque-Haro E, Hurtier A, Lévêque P, Ruffié G, Taxile M, Veyret B, Lagroye I.	2017-11-14	Effect	Pulsed	Simulated		Mobile Phone GSM Simulated	https://www.ncbi.nlm.nih.gov/pubmed/29138435	UHF (300 MHz-3 GHz) studies	German Federal Ministry for Environment, Nature Protection and Reactor Safety, Aquitaine Council for Research, the École Pratique Hautes Études, and the Centre National Recherche Scientifique.	0	1
2741	Effects of 900-MHz radiation on the hippocampus and cerebellum of adult rats and attenuation of such effects by folic acid and Boswellia sacra	Kivrak EG, Altunkaynak BZ,Alkan I,Yurt KK, Kocaman A, Onge ME.	2017-12-01	Effect	Pulsed	Simulated	1	Mobile Phone GSM Simulated	http://www.sciencedirect.com/science/article/pii/S2213879X17300391	UHF (300 MHz-3 GHz) studies	Ondokuz Mayıs University	0	1
2742	Effects of folic acid on rat kidney exposed to 900 MHz electromagnetic radiation	Deniz OG, Kivrak EG, Kaplan AA,Altunkaynak BZ.	2017-12-01	Effect	Pulsed	Simulated		Mobile Phone GSM Simulated	http://www.sciencedirect.com/science/article/pii/S2213879X17300500	UHF (300 MHz-3 GHz) studies	Ondokuz Mayıs University	0	1
2743	The ameliorative effect of gallic acid on pancreas lesions induced by 2.45 GHz electromagnetic radiation (Wi-Fi) in young rats	Topsakalb S,Ozmen O,Cicek E,Comlekci S.	2017-07-01	Effect	Pulsed		1	RF Signal Generator	http://www.sciencedirect.com/science/article/pii/S1687850717300468	UHF (300 MHz-3 GHz) studies	No stated	0	1
2746	Effect of long-term exposure of mice to 900 MHz GSM radiation on experimental cutaneous candidiasis	Bayat M, Hemati S, Soleimani-Estyar R, Shahin-Jafari A.	2017-05-01	Effect	Pulsed	Simulated		Mobile Phone GSM Simulated	https://www.ncbi.nlm.nih.gov/pubmed/28490964	UHF (300 MHz-3 GHz) studies	Vice-chancellor of Iranian National Science Foundation for supporting this project	0	1
2747	The effects of microwave radiation on rabbit's retina	Talebnejad MR, Sadeghi-Sarvestani A, Nowroozzadeh MH, Mortazavi SMJ.	2017-10-09	Uncertain Effect	Pulsed	Simulated		Mobile Phone GSM Simulated	http://www.sciencedirect.com/science/article/pii/S2452232517300562	UHF (300 MHz-3 GHz) studies	Shiraz University of Medical Sciences	0	1
2760	Long-term RF exposure on behavior and cerebral glucose metabolism in 5xFAD mice	Son Y, Kim JS, Jeong YJ, Jeong YK, Kwon JH, Choi HD, Pack JK, Kim N, Lee YS, Lee HJ.	2017-12-01	Effect	Pulsed	Simulated		Mobile Phone GSM Simulated	https://www.ncbi.nlm.nih.gov/pubmed/29273398	UHF (300 MHz-3 GHz) studies	Institute for Information & communications Technology Promotion(IITP) grant funded by the Korea government(MSIT)	0	1
2764	Microwave radiation-induced chromosomal aberrations in corneal epithelium of Chinese hamsters	Yao KT.	1978-11-01	Effect	Continuous			Diathermy Microwave	https://www.ncbi.nlm.nih.gov/pubmed/753878	UHF (300 MHz-3 GHz) studies		0	1
2769	The alteration of spontaneous low frequency oscillations caused by acute electromagnetic fields exposure	Lv B, Chen Z, Wu T, Shao Q, Yan D, Ma L, Lu K, Xie Y.	2014-02-01	Effect	Pulsed	Simulated		Mobile Phone GSM Simulated	https://www.ncbi.nlm.nih.gov/pubmed/24012322	UHF (300 MHz-3 GHz) studies	National Natural Science Foundation (NSFC), China , China Postdoctoral Science Foundation (CPSF), China National Key Basic Research Project, China	0	1
2790	Neurodegenerative changes and apoptosis induced by intrauterine and extrauterine exposure of radiofrequency radiation	Guler G, Ozgur E, Keles H, Tomruk A, Vural SA, Seyhan N.	2016-09-01	Effect	Pulsed	Simulated	1	Mobile Phone GSM Simulated	https://www.ncbi.nlm.nih.gov/pubmed/26520616	UHF (300 MHz-3 GHz) studies	Not Stated	0	1
2793	Effects of 1800 MHz RF-EMF exposure on DNA damage and cellular functions in primary cultured neurogenic cells	Su L, Yimaer A, Xu Z, Chen G.	2018-01-01	Effect	Pulsed	Simulated		Mobile Phone GSM Simulated	https://www.ncbi.nlm.nih.gov/pubmed/29368975	UHF (300 MHz-3 GHz) studies	National Natural Science Foundation of China Grant	1	0
2795	DNA Damage of Lymphocytes in Volunteers after 4 hours Use of Mobile Phone	Ji S, Oh E, Sul D, Choi JW, Park H, Lee E.	2004-11-01	Effect	Pulsed	Real		Mobile Phone GSM	https://www.ncbi.nlm.nih.gov/pubmed/25175620	UHF (300 MHz-3 GHz) studies	Not known	0	1
2796	A genotoxic analysis of the hematopoietic system after mobile phone type radiation exposure in rats	Kumar G, McIntosh RL, Anderson V, McKenzie RJ, Wood AW.	2015-08-01	No Effect	Continuous			Transverse Electromagnetic (TEM) Cell	https://www.ncbi.nlm.nih.gov/pubmed/25955504	UHF (300 MHz-3 GHz) studies	Institutional funding from Swinburne University of Technology and R McKenzie works for Australian Mobile Telephone Association, specifically Mobile Carriers Forum (MCF)	1	0
2798	Measurement of DNA damage after exposure to 2450 MHz electromagnetic radiation	Malyapa RS, Ahern EW, Straube WL, Moros EG, Pickard WF, Roti Roti JL.	1997-12-01	No Effect	Continuous			RF Signal Generator and Transverse Electromagetic (TEM) Cell	https://www.ncbi.nlm.nih.gov/pubmed/9399707	UHF (300 MHz-3 GHz) studies	Motorola	1	0
2799	DNA damage in rat brain cells after in vivo exposure to 2450 MHz electromagnetic radiation and various methods of euthanasia	Malyapa RS, Ahern EW, Bi C, Straube WL, LaRegina M, Pickard WF, Roti RotiJL	1998-06-01	No Effect	Continuous			RF Signal Generator and a Transverse Electromagnetic (TEM) Cell	https://www.ncbi.nlm.nih.gov/pubmed/9611103	UHF (300 MHz-3 GHz) studies	Motorola	0	1
2800	Measurement of DNA damage after exposure to electromagnetic radiation in the cellular phone communication frequency band (835.62 and 847.74 MHz)	Malyapa RS, Ahern EW, Bi C, Straube WL, LaRegina M, Pickard WF, Roti RotiJL	1997-12-01	No Effect	Continuous			RF Signal Generator and Transverse Electromagnetic (TEM) Cell	https://www.ncbi.nlm.nih.gov/pubmed/9399708	UHF (300 MHz-3 GHz) studies	Motorola	1	0
2803	In Situ Expression of Heat-Shock Proteins and 3-Nitrotyrosine in Brains of Young Rats Exposed to a WiFi Signal In Utero and In Early Life	Aït-Aïssa S, de Gannes FP, Taxile M, Billaudel B, Hurtier A, Haro E, Ruffié G, Athané A, Veyret B, Lagroye I.	2013-06-01	No Effect	Pulsed	Simulated		WiFi simulated	https://www.ncbi.nlm.nih.gov/pubmed/23662649	UHF (300 MHz-3 GHz) studies	French ‘‘Health and Radiofrequency Foundation’ Authors used English spelling to declare funding source rather than the French name - Fondation Santé et Radiofréquences which is funded jointly by Government and Industry	0	1
2804	Glial markers and emotional memory in rats following acute cerebral radiofrequency exposures	Barthelemy A, Mouchard A, Bouji M, Blazy K, Puigsegur R, Villégier AS	2016-12-01	Effect	Pulsed	Simulated		Mobile Phone GSM Simulated	https://www.ncbi.nlm.nih.gov/pubmed/27696165	UHF (300 MHz-3 GHz) studies	French Ministry of Ecology (MEDDTL).	0	1
2805	Pyramidal Cell Loss in the Cornu Ammonis of 32-day-old Female Rats Following Exposure to a 900 Megahertz Electromagnetic Field During Prenatal Days 13–21	Bas O, Sönmez OF, Aslan A, Ikinci A, Hanci H, Yildirim M, Kaya H, Akca M, Odaci E	2013-12-01	Effect	Pulsed	Simulated		Mobile Phone GSM Simulated	https://www.neuroquantology.com/index.php/journal/article/view/701	UHF (300 MHz-3 GHz) studies	School of Medicine, a number of universities in Turkey	0	1
2806	Suppressive effect of electromagnetic field on analgesic activity of tramadol in rats	Bodera P, Stankiewicz W, Antkowiak B, Paluch M, Kieliszek J, Sobiech J, Zdanowski R, Wojdas A, Siwicki AK, Skopińska-Rózewska E	2015-12-01	Effect	Pulsed	Simulated		Mobile Phone GSM Simulated	https://www.ncbi.nlm.nih.gov/pubmed/22708363	UHF (300 MHz-3 GHz) studies	No stated	0	1
2807	Food collection and response to pheromones in an ant species exposed to electromagnetic radiation	Cammaerts MC, Rachidi Z, Bellens F, De Doncker P	2013-09-01	Effect	Pulsed	Real		Mobile Phone GSM	https://www.ncbi.nlm.nih.gov/pubmed/23320633	UHF (300 MHz-3 GHz) studies	No Conflict of Interest Stated	0	1
2808	Effects of Electromagnetic Radiation from Smartphones on Learning Ability and Hippocampal Progenitor Cell Proliferation in Mice	Chou YJ, Choi YS	2015-12-17	Effect	Pulsed	Real		Mobile Phone GSM	https://www.ncbi.nlm.nih.gov/pmc/articles/PMC4776265/	UHF (300 MHz-3 GHz) studies	Korean Foundation for the Advancement of Science & Creativity (HCR. 2013).	0	1
2809	Effect of long-term (2 years) exposure of mouse brains to global system for mobile communication (GSM) radiofrequency fields on astrocytic immunoreactivity	Court-Kowalski S, Finnie JW, Manavis J, Blumbergs PC, Helps SC, Vink R.	2015-04-01	No Effect	Pulsed	Simulated		Mobile Phone GSM Simulated	https://www.ncbi.nlm.nih.gov/pubmed/25703451	UHF (300 MHz-3 GHz) studies	National Health & Medical Research Council's Australian Centre for Electromagnetic Bioeffects Researc	0	1
2812	Frequent cellular phone use modifies hypothalamic-pituitary-adrenal axis response to a cellular phone call after mental stress in healthy children and adolescents: A pilot study	Geronikolou SA, Chamakou A, Mantzou A, Chrousos G, KanakaGantenbein C	2015-12-01	Effect	Pulsed	Real		Mobile Phone GSM	https://www.ncbi.nlm.nih.gov/pubmed/26204054	UHF (300 MHz-3 GHz) studies	This research has been conducted with no funding.	0	1
2814	Effects of acute and chronic exposure to both 900 MHz and 2100 MHz electromagnetic radiation on glutamate receptor signaling pathway	Gökçek-Saraç Ç, Er H, Kencebay Manas C, Kantar Gok D, Özen Ş, Derin N.	2017-09-01	Effect	Pulsed	Simulated		Mobile Phone GSM Simulated	https://www.ncbi.nlm.nih.gov/pubmed/28565929	UHF (300 MHz-3 GHz) studies	Akdeniz University The Scientific Research Projects Coordination Unit, Turkey	0	1
2815	Effect of Prolonged Use of Mobile Phone on Brainstem Auditory Evoked Potentials	Gupta N, Goyal D, Sharma R, Arora KS.	2015-05-01	No Effect	Pulsed	Real		Mobile Phone	https://www.ncbi.nlm.nih.gov/pmc/articles/PMC4484065/	UHF (300 MHz-3 GHz) studies	None	0	1
2816	The effect of Wi-Fi electromagnetic waves in unimodal and multimodal object recognition tasks in male rats	Hassanshahi A, Shafeie SA, Fatemi I, Hassanshahi E, Allahtavakoli M, Shabani M, Roohbakhsh A, Shamsizadeh A.	2017-06-01	Effect	Pulsed	Real		WiFi	https://www.ncbi.nlm.nih.gov/pubmed/28332042	UHF (300 MHz-3 GHz) studies	Research Deputy of Rafsanjan University of Medical Sciences	0	1
2817	Inhibition of STAT3- and MAPK-dependent PGE2 synthesis ameliorates phagocytosis of fibrillar β-amyloid peptide (1-42) via EP2 receptor in EMF-stimulated N9 microglial cells	He GL, Luo Z, Shen TT, Li P, Yang J, Luo X, Chen CH, Gao P, Yang XS.	2016-11-01	Effect	Pulsed	Real		Mobile Phone	https://www.ncbi.nlm.nih.gov/pubmed/27871289	UHF (300 MHz-3 GHz) studies	National Natural Science Foundation of China (Nos. 81172647 and 81302412).	1	0
2818	The Effects of Prenatal Exposure to a 900 Megahertz Electromagnetic Field on Hippocampus Morphology and Learning Behavior in Rat Pups	Ikinci A, Odaci E, Yildirim M, Kaya H, Akca M, Hanci H, Aslan A, Sönmez OF, Bas O	2013-12-01	Effect	Continuous	Simulated		Mobile Phone GSM Simulated	https://www.emf-portal.org/en/article/26768	UHF (300 MHz-3 GHz) studies	Not Stated	0	1
2821	Behavior and memory evaluation of Wistar rats exposed to 1·8 GHz radiofrequency electromagnetic radiation	de Caires Jr LC, da Silveira Goulart Guimarães E, Manso Musso C, Stabler CT, Garcia RMG, Mourao Jr CA, Andreazzi AE	2014-01-27	Effect	Pulsed	Real		Mobile Phone GSM	https://www.ncbi.nlm.nih.gov/pubmed/24620965	UHF (300 MHz-3 GHz) studies	Not Stated	0	1
2824	Effect of whole-body exposure to the 848.5-MHz code division multiple access (CDMA) electromagnetic field on adult neurogenesis in the young, healthy rat brain	Kim HS, Kim YJ, Lee YH, Lee YS, Choi HD, Pack JK, Kim N, Ahn YH.	2015-04-01	No Effect	Pulsed	Simulated		Mobile Phone CDMA Simulated	https://www.ncbi.nlm.nih.gov/pubmed/25510255	UHF (300 MHz-3 GHz) studies	ICT R&D program of MSIP/IITP (Ministry of Science, ICT and Future Planning/Institute for Information & Communications Technology Promotion), Korea	0	1
2825	Lycopersicon esculentum extract on apoptosis in the rat cerebellum, following prenatal and postnatal exposure to an electromagnetic field	Kokturk S, Yardimoglu M, Celikozlu SD, Dolanbay EG, Cimbiz A	2013-05-17	Effect	Pulsed	Real		Mobile Phone GSM	https://www.ncbi.nlm.nih.gov/pubmed/23935717	UHF (300 MHz-3 GHz) studies	No stated	0	1
2826	Cell Phone Generated Radio Frequency Electromagnetic Field Effects on the Locomotor Behaviors of the Fishes Poecilia reticulata and Danio rerio	Lee D, Lee J, Lee I.	2015-07-08	Effect	Pulsed	Real		Mobile Phone GSM	https://www.ncbi.nlm.nih.gov/pubmed/26073525	UHF (300 MHz-3 GHz) studies	No stated	0	1
2829	Inter-individual and intra-individual variation of the effects of pulsed RF EMF exposure on the human sleep EEG	Lustenberger C, Murbach M, Tüshaus L, Wehrle F, Kuster N, Achermann P, Huber R.	2015-04-01	Effect	Pulsed	Simulated		Mobile Phone GSM Simulated	https://www.ncbi.nlm.nih.gov/pubmed/25690404	UHF (300 MHz-3 GHz) studies	Swiss Research Foundation on Electricity and Mobile Communication; Swiss National Science Foundation.	0	1
2832	Effect of Bluetooth headset and mobile phone electromagnetic fields on the human auditory nerve	Mandala M, Colletti V, Sacchetto L, Manganotti P, Ramat S, Marcocci A, Colletti L.	2014-04-25	Effect	Pulsed	Real		Mobile Phone	https://www.ncbi.nlm.nih.gov/pubmed/23619813	UHF (300 MHz-3 GHz) studies	No Conflict of Interest Stated	0	1
2833	In-vitro exposure of neuronal networks to the GSM-1800 signal	Moretti D, Garenne A, Haro E, Poulletier de Gannes F, Lagroye I, Leveque P, Veyret B, Lewis N	2013-12-01	Effect	Pulsed			Transverse Electromagnetic (TEM) Cell	https://www.ncbi.nlm.nih.gov/pubmed/23913345	UHF (300 MHz-3 GHz) studies	Ministry of National Education and Research, France; University of Bordeaux; CNRS; Bouygues Telecom. CNRS; French National Centre for Scientific Research	1	0
2834	The Effects of 900 Megahertz Electromagnetic Field Applied in the Prenatal Period on Spinal Cord Morphology and Motor Behavior in Female Rat Pups	Odaci E, Ikinci A, Yildirim M, Kaya H, Akca M, Hanci H, Sönmez OF, Aslan A, Okuyan M, Bas O	2013-12-01	Effect	Pulsed	Simulated		Mobile Phone Simulated	https://www.neuroquantology.com/index.php/journal/article/view/698	UHF (300 MHz-3 GHz) studies	Not Stated	0	1
2839	Nonthermal Effects of Lifelong High-Frequency Electromagnetic Field Exposure on Social Memory Performance in Rats	Schneider J, Stangassinger M	2014-10-01	Effect	Pulsed	Simulated		Mobile Phone GSM Simulated	https://www.ncbi.nlm.nih.gov/pubmed/24999587	UHF (300 MHz-3 GHz) studies	Bundesamt für Strahlenschutz (BfS; Federal Office for Radiation Protection), Salzgitter, Germany	0	1
2840	Multigenerational effects of whole body exposure to 2.14 GHz W-CDMA cellular phone signals on brain function in rats	Shirai T, Imai N, Wang J, Takahashi S, Kawabe M, Wake K, Kawai H, Watanabe S, Furukawa F, Fujiwara O.	2014-10-01	No Effect	Pulsed	Real		WCDMA Wideband Code Division Multiple Access 3G	https://www.ncbi.nlm.nih.gov/pubmed/25196377	UHF (300 MHz-3 GHz) studies	Grant from Ministry of Internal Affairs and Communications, Japan for 2008 and 2009.	0	1
2841	Effects of GSM modulated radio-frequency electromagnetic radiation on permeability of blood-brain barrier in male & female rats	Sirav B, Seyhan N	2016-09-01	Effect	Pulsed	Simulated		Mobile Phone GSM Simulated	https://www.ncbi.nlm.nih.gov/pubmed/26723545	UHF (300 MHz-3 GHz) studies	Gazi University Research Foundation, Turkey	0	1
2845	Effect of electromagnetic radiation on discharge activity of neurons in the hippocampus CA1 in rats	Tong J, Chen S, Liu XM, Hao DM.	2013-09-01	Effect	Not Stated			Microwave	https://www.ncbi.nlm.nih.gov/pubmed/24386818	UHF (300 MHz-3 GHz) studies	No stated	0	1
2850	Long term impairment of cognitive functions and alterations of NMDAR subunits after continuous microwave exposure	Wang H, Tan S, Xu X, Zhao L, Zhang J, Yao B, Gao Y, Zhou H, Peng R.	2017-11-01	Effect	Pulsed			Microwave	https://www.ncbi.nlm.nih.gov/pubmed/28866028	UHF (300 MHz-3 GHz) studies	National Natural Science Foundation of China.	0	1
2852	Microwave Exposure Impairs Synaptic Plasticity in the Rat Hippocampus and PC12 Cells through Over-activation of the NMDA Receptor Signaling Pathway	Xiong L, Sun CF, Zhang J, Gao YB, Wang LF, Zuo HY, Wang SM, Zhou HM, Xu XP, Dong J, Yao BW, Zhao L, Peng RY.	2015-01-01	Effect	Pulsed			Simulated by a signal generator	https://www.ncbi.nlm.nih.gov/pubmed/25566859	UHF (300 MHz-3 GHz) studies	Not Stated	0	1
2854	Upregulation of specific mRNA levels in rat brain after cell phone exposure	Yan JG, Agresti M, Zhang LL, Yan Y, Matloub HS.	2009-07-07	Effect	Pulsed	Real		Mobile Phone CDMA	https://www.ncbi.nlm.nih.gov/pubmed/18568932	UHF (300 MHz-3 GHz) studies	No stated	0	1
2856	The role of the JAK2-STAT3 pathway in pro-inflammatory responses of EMF-stimulated N9 microglial cells	Yang X, He G, Hao Y, Chen C, Li M, Wang Y, Zhang G, Yu Z.	2010-09-01	Effect	Pulsed	Real		Mobile Phone	https://www.ncbi.nlm.nih.gov/pubmed/20828402	UHF (300 MHz-3 GHz) studies	National Natural Science Foundation of China	1	0
2857	p25/CDK5 is partially involved in neuronal injury induced by radiofrequency electromagnetic field exposure	Zhang Y, She F, Li L, Chen C, Xu S, Luo X, Li M, He M, Yu Z.	2013-06-13	Effect	Pulsed			RF Signal Generator	https://www.ncbi.nlm.nih.gov/pubmed/23786497	UHF (300 MHz-3 GHz) studies	National Natural Science Foundation of China Author is associated with the Military	1	0
2858	RKIP regulates neural cell apoptosis induced by exposure to microwave radiation partly through the MEK/ERK/CREB pathway	Zuo H, Lin T, Wang D, Peng R, Wang S, Gao Y, Xu X, Zhao L, Wang S, Su Z.	2015-06-01	Effect	Continuous			RF Signal Generator	https://www.ncbi.nlm.nih.gov/pubmed/25108669	UHF (300 MHz-3 GHz) studies	National Natural Science Foundation of China the Military Medical Fund, and the Major National Science and Technology Program of China	1	0
2859	Multivariate Entropy Analysis of Oxidative Stress Biomarkers Following Mobile Phone Exposure of Human Volunteers: A Pilot Study	Marconi A, Tasteyre A, de Seze R, Fogel P, Simoneau G, Conti M, Sarbach C, Young SS, Gilbert J-E, Thomas Y.	2015-10-01	Effect	Pulsed	Real	1	Mobile Phone GSM	https://www.researchgate.net/publication/310773684_Multivariate_Entropy_Analysis_of_Oxidative_Stress_Biomarkers_Following_Mobile_Phone_Exposure_of_Human_Volunteers_A_Pilot_Study_-_ANTHONY_MARCONI_ALBERT_TASTEYRE_RENE_DE_SEZE_PAUL_FOGEL_GUY_SIMONEAU_MA	UHF (300 MHz-3 GHz) studies	French universities collaboration	0	1
2860	Exposure to mobile phone (900-1800 MHz) during pregnancy: tissue oxidative stress after childbirth	Bahreyni Toossi MH, Sadeghnia HR, Mohammad Mahdizadeh Feyzabadi M, Hosseini M, Hedayati M, Mosallanejad R, Beheshti F, Alizadeh Rahvar Z.	2018-05-01	Effect	Pulsed	Real	1	Mobile Phone GSM	https://www.ncbi.nlm.nih.gov/pubmed/28434276	UHF (300 MHz-3 GHz) studies	Mashhad University of Medical Sciences, Iran	0	1
2862	Phenotypic and genotypic characterization of antioxidant enzyme system in human population exposed to radiation from mobile towers	Gulati S, Yadav A, Kumar N, Priya K, Aggarwal NK, Gupta R.	2018-03-01	Effect	Pulsed	Real	1	Base Station	https://www.ncbi.nlm.nih.gov/pubmed/28819931	UHF (300 MHz-3 GHz) Ecological studies	Science and Engineering Research Board, Department of Science and Technology (DST), New Delhi, India for funding through Grant	0	1
2863	Effects of long-term exposure to 900 megahertz electromagnetic field on heart morphology and biochemistry of male adolescent rats	Kerimoglu G, Mercantepe T, Erol HS, Turgut A, Kaya H, Colakoglu S, Odaci E.	2016-08-11	Effect	Continuous		1	Microwave	https://www.ncbi.nlm.nih.gov/pubmed/27715326	UHF (300 MHz-3 GHz) studies	Karadeniz Technical University, Turkey	0	1
2865	Impacts of exposure to 900 MHz mobile phone radiation on liver function in rats	Ma HR, Ma ZH, Wang GY, Song CM, Ma XL, Cao XH, Zhang GH.	2015-11-01	Effect	Pulsed	Real	1	Mobile Phone	https://www.ncbi.nlm.nih.gov/pubmed/27215026	UHF (300 MHz-3 GHz) studies	Not Known	0	1
2866	Biochemical and pathological changes in the male rat kidney and bladder following exposure to continuous 900-MHz electromagnetic field on postnatal days	Turedi S, Kerimoğlu G, Mercantepe T, Odaci E.	2017-09-01	Effect	Continuous		1	Microwave	https://www.ncbi.nlm.nih.gov/pubmed/28747141	UHF (300 MHz-3 GHz) studies	No Conflict of Interest Stated	0	1
2869	Effects of combined radiofrequency field exposure on amyloid-beta-induced cytotoxicity in HT22 mouse hippocampal neurones	Lee JS, Kim JY, Kim HJ, Kim JC, Lee JS, Kim N, Park MJ.	2016-11-01	No Effect	Pulsed	Simulated		Mobile Phone CDMA Simulated	https://www.ncbi.nlm.nih.gov/pubmed/27325640	UHF (300 MHz-3 GHz) studies	IT R&D program of MSIP/IITP [B0138-15-1002, Study on the EMF exposure control in smart society] and the National R&D Program through the Korea Institute of Radiological and Medical Sciences funded by the Ministry of Science, ICT & Future Planning [No.1711021925].	1	0
2916	A histopathological and biochemical evaluation of oxidative injury in the sciatic nerves of male rats exposed to a continuous 900-megahertz electromagnetic field throughout all periods of adolescence	Kerimoglu G, Güney C, Ersöz Ş, Odacı E.	2018-01-10	Effect	Pulsed	Simulated	1	Mobile Phone GSM Simulated	https://www.ncbi.nlm.nih.gov/pubmed/29331319	UHF (300 MHz-3 GHz) studies	Not Stated	0	1
2917	Continuous 900-megahertz electromagnetic field applied in middle and late-adolescence causes qualitative and quantitative changes in the ovarian morphology, tissue and blood biochemistry of the rat	Okatan DÖ, Kaya H, Aliyazıcıoğlu Y, Demir S, Çolakoğlu S, Odacı E.	2018-02-01	Effect	Continuous		1	Microwave	https://www.ncbi.nlm.nih.gov/pubmed/29268055	UHF (300 MHz-3 GHz) studies	Karadeniz Technical University Research Fund	0	1
2922	Biochemical and histological studies on adverse effects of mobile phone radiation on rat's brain	Hussein S, El-Saba AA, Galal MK.	2016-12-01	Effect	Pulsed	Real	1	Mobile Phone GSM	https://www.ncbi.nlm.nih.gov/pubmed/27474378	UHF (300 MHz-3 GHz) studies	No Conflict of Interest Stated	0	1
2929	Long term exposure to cell phone frequencies (900 and 1800 MHz) induces apoptosis, mitochondrial oxidative stress and TRPV1 channel activation in the hippocampus and dorsal root ganglion of rats	Ertilav K, Uslusoy F, Ataizi S, Nazıroğlu M.	2018-01-13	Effect	Pulsed	Simulated	1	Mobile Phone GSM Simulated	https://www.ncbi.nlm.nih.gov/pubmed/29332300	UHF (300 MHz-3 GHz) studies	No funding was received in support of this work	0	1
2930	1950 MHz RF EMR Inhibits Testosterone Secretion of Mouse Leydig Cells	Lin YY, Wu T, Liu JY, Gao P, Li KC, Guo QY, Yuan M, Lang HY, Zeng LH, Guo GZ.	2017-12-23	Uncertain Effect	Pulsed	Simulated		Mobile Phone GSM (Talk) Simulated	https://www.ncbi.nlm.nih.gov/pubmed/29295490	UHF (300 MHz-3 GHz) studies	National Basic Research Program of China and the Natural Science Foundation of China	1	0
2939	Gene Expression Analysis in Human Peripheral Blood Cells after 900 MHz RF-EMF Short-Term Exposure	Lamkowski A, Kreitlow M, Radunz J, Willenbockel M, Sabath F, Schuhn W, Stiemer M, Fichte LO, Dudzinski M, Böhmelt S, Ullmann R, Majewski M, Franchini V, Ede S, Rump A, Port M, Abend M.	2018-03-06	No Effect	Continuous			Microwave	https://www.ncbi.nlm.nih.gov/pubmed/29509058	UHF (300 MHz-3 GHz) studies	Not Stated	1	0
2940	Acute effects of 30 minutes of exposure to a smartphone call on in vitro platelet function	Lippi G, Danese E, Brocco G, Gelati M, Salvagno GL, Montagnana M.	2017-05-01	Effect	Pulsed	Real		Mobile Phone GSM	https://www.ncbi.nlm.nih.gov/pubmed/27177410	UHF (300 MHz-3 GHz) studies	Not Stated	1	0
2970	Electromagnetic energy radiated from mobile phone alters electrocardiographic records of patients with ischemic heart disease	Alhusseiny A, Al-Nimer M, Majeed A.	2012-07-01	Effect	Pulsed	Real		Mobile Phone GSM	https://www.ncbi.nlm.nih.gov/pubmed/23440607	UHF (300 MHz-3 GHz) studies	No Conflict of Interest Stated	0	1
2971	The influence of the call with a mobile phone on heart rate variability parameters in healthy volunteers	Andrzejak R, Poreba R, Poreba M, Derkacz A, Skalik R, Gac P, Beck B, Steinmetz-Beck A, Pilecki W.	2008-08-01	Effect	Pulsed	Real		Mobile Phone GSM	https://www.ncbi.nlm.nih.gov/pubmed/18716391	UHF (300 MHz-3 GHz) studies	Not Stated	0	1
2976	Radiofrequency energy loop primes cardiac, neuronal, and skeletal muscle differentiation in mouse embryonic stem cells: a new tool for improving tissue regeneration	Maioli M, Rinaldi S, Santaniello S, Castagna A, Pigliaru G, Gualini S, Fontani V, Ventura C	2012-06-01	Effect	Pulsed	Simulated		WiFi simulated	https://www.ncbi.nlm.nih.gov/pubmed/21975035	UHF (300 MHz-3 GHz) studies	Regione Emilia Romagna, Programma di Ricerca Regione-Universita` 2007/2009, Area 1b “Medicina rigenerativa,” Italy; Ministero della Salute, Italy,	1	0
2982	Calcium homeostasis of isolated heart muscle cells exposed to pulsed high-frequency electromagnetic fields	Wolke S, Neibig U, Elsner R, Gollnick F, Meyer R	1996-01-01	No Effect	Continuous	Simulated		Mobile Phone GSM Simulated	https://www.ncbi.nlm.nih.gov/pubmed/8860732	UHF (300 MHz-3 GHz) studies	Research Association of Electromagnetic Compatibility of Biological Systems, Technical University Braunschweig, Germany , Research Association for Radio Applications, Germany	1	0
3015	Exposure to radio-frequency electromagnetic waves alters acetylcholinesterase gene expression, exploratory and motor coordination-linked behaviour in male rats	Obajuluwa AO, Akinyemi AJ, Afolabi OB, Adekoya K, Sanya JO, Ishola AO.	2017-10-03	Effect	Pulsed	Simulated		WiFi simulated	https://www.ncbi.nlm.nih.gov/pubmed/?term=Obajuluwa%20AO%5BAuthor%5D&cauthor=true&cauthor_uid=29657919	UHF (300 MHz-3 GHz) studies	No Conflict of Interested State. TWAS Research grant	0	1
3018	Selenium supplementation ameliorates electromagnetic field-induced oxidative stress in the hek293 cells	Ozsobacı NP, Düzgün Ergün D, Durmuş S, Tunçdemir M, Uzun H, Gelişgen R, Özçelik D.	2018-04-13	Effect	Continuous		1	RF Signal Generator	https://www.ncbi.nlm.nih.gov/pubmed/29685784	UHF (300 MHz-3 GHz) studies	Research Fund of Istanbul University.	1	0
3021	Effects of cell phone radiation on the levels of T3, T4 and TSH, and histological changes in thyroid gland in rats treated with Allium sativum extract	Hajioun B, Jowhari H, Mokhtari M.	2014-01-01	Effect	Pulsed	Real	1	Mobile Phone GSM	https://www.researchgate.net/publication/287343006_Effects_of_cell_phone_radiation_on_the_levels_of_T3_T4_and_TSH_and_histological_changes_in_thyroid_gland_in_rats_treated_with_Allium_sativum_extract	UHF (300 MHz-3 GHz) studies		0	1
3024	Long Term Exposure to Cell Phone Radiation and Stress	Ahmadi Tameh A, Ahmadi R, Gohari A.	2014-12-23	Effect	Pulsed	Real		Mobile Phone	https://pdfs.semanticscholar.org/fe8f/7e9212a37d038ecc172acc8ae90eb59d40ec.pdf	UHF (300 MHz-3 GHz) studies	Islamic Azad University, Hamedan Branch, Hamedan, Iran	0	1
3030	Effects of 900 MHz Electromagnetic Fields Emitted From a Cellular Phone on the T3, T4, and Cortisol Levels in Syrian Hamsters	Shahryar HA, Lotfi A, Ghodsi MB, Bonary ARK.	2009-01-09	Effect	Pulsed	Real		Mobile Phone GSM	https://pdfs.semanticscholar.org/aefa/0325b23a1fd20dc52713cf448785b1e9b850.pdf	UHF (300 MHz-3 GHz) studies	Islamic Azad University, Shabestar Branch for the financial support	0	1
3044	Exposure to 835 MHz RF-EMF decreases the expression of calcium channels, inhibits apoptosis, but induces autophagy in the mouse hippocampus	Kim JH, Sohn UD, Kim HG, Kim HR.	2018-05-01	Effect	Continuous	Simulated		Mobile Phone GSM Simulated	https://www.ncbi.nlm.nih.gov/pubmed/29719450	UHF (300 MHz-3 GHz) studies	Basic Science Research Program through the National Research Foundation of Korea (NRF) funded by the Ministry of Education (	0	1
3045	Effects of 1.8 GHz radiofrequency field on microstructure and bone metabolism of femur in mice	Guo L, Zhang JP, Zhang KY, Wang HB, Wang H, An GZ, Zhou Y, Meng GL, Ding GR.	2018-04-30	No Effect	Continuous	Simulated		Mobile Phone GSM Simulated	https://www.ncbi.nlm.nih.gov/pubmed/29709060	UHF (300 MHz-3 GHz) studies	Fund of National Natural Science Foundation of China; grant number: 31770905; Special Fund from People’s Liberation Army of China (PLA); grant number: 16CXZ020.	0	1
3067	Hippocampal lipidome and transcriptome profile alterations triggered by acute exposure of mice to GSM 1800 MHz mobile phone radiation: An exploratory study	Fragopoulou AF, Polyzos A, Papadopoulou MD, Sansone A, Manta AK, Balafas E, Kostomitsopoulos N, Skouroliakou A, Chatgilialoglu C, Georgakilas A, Stravopodis DJ, Ferreri C, Thanos D, Margaritis LH.	2018-05-22	Effect	Pulsed	Real		Mobile Phone GSM	https://www.ncbi.nlm.nih.gov/pubmed/29786969	UHF (300 MHz-3 GHz) studies	European Union (European Social Fund –ESF) and Greek national funds, Grant/Award Number: THALES – UoA – MIS 375784; Stiftelsen Samariten; Di Bella Foundation	0	1
3075	2450 MHz EMR exposure causes cognition deficit with mitochondrial dysfunction & activation of intrinsic pathway of apoptosis in rats	Gupta SK, Mesharam MK, Krishnamurth S.	2014-03-24	Effect	Pulsed		1	RF Signal Generator	https://link.springer.com/article/10.1007/s12038-018-9744-7	UHF (300 MHz-3 GHz) studies	Indian Institute of Technology–Banaras Hindu University (IIT-BHU)	0	1
3076	Oxidative stress and an animal neurotransmitter synthesizing enzyme in wild growing myrtle leaves after GSM radiation exposure	Stefi AL, Vassilacopoulou D, Margaritis LH, Christodoulakisa NS.	2018-04-16	Effect	Pulsed	Real	1	Mobile Phone GSM (Talk)	https://www.sciencedirect.com/science/article/pii/S0367253018301208	UHF (300 MHz-3 GHz) studies	Hellenic Foundation for Research and Innovation (ΕΛΙΔΕΚ) according to the framework for the financial support of doctoral candidates who already implement their doctoral theses in Greek Universities.	0	1
3090	Evaluating Temperature Changes of Brain Tissue Due to Induced Heating of Cell Phone Waves	Forouharmajd F, Pourabdian S, Ebrahimi H.	2018-04-26	Effect	Pulsed	Real		Mobile Phone	https://www.ncbi.nlm.nih.gov/pubmed/29861880	UHF (300 MHz-3 GHz) studies	No external funding	1	0
3091	Can Electromagnetic Exposure Cause a Change in Behaviour? Studying Possible Non-Thermal Influences on Honey Bees – An Approach within the Framework of Educational Informatics	Harst W, Kuhn J, Stever H.	2016-04-25	Effect	Pulsed	Real		DECT Phone	https://www.researchgate.net/publication/237523719_Can_Electromagnetic_Exposure_Cause_a_Change_in_Behaviour_Studying_Possible_Non-Thermal_Influences_on_Honey_Bees_-_An_Approach_within_the_Framework_of_Educational_Informatics	UHF (300 MHz-3 GHz) studies	Not Stated	0	1
3092	Effect of cell-phone radiofrequency on angiogenesis and cell invasion in human head and neck cancer cells	Alahmad YM, Aljaber M, Saleh AI, Yalcin HC, Aboulkassim T, Yasmeen A, Batist G, Moustafa AA.	2018-05-13	Effect	Pulsed	Real		Mobile Phone GSM	https://www.ncbi.nlm.nih.gov/pubmed/29756334	UHF (300 MHz-3 GHz) studies	Qatar University and GCC grant	1	0
3098	Exposure to radiation from single or combined radio frequencies provokes macrophage dysfunction in the RAW 264.7 cell line	Lopez-Furelos A, Salas-Sánchez AA, Ares-Pena FJ, Leiro-Vidal JM, López-Martín E.	2018-06-01	Effect	Sinusoidal		1	RF Signal Generator and Transverse Electromagnetic (TEM) Cell	https://www.ncbi.nlm.nih.gov/pubmed/29659305	UHF (300 MHz-3 GHz) studies	Ministry of Economy and Competitiveness through Project TEC- 2011-24441.	1	0
3099	Evidence of cellular stress and caspase-3 resulting from a combined two-frequency signal in the cerebrum and cerebellum of Sprague-dawley rats	Lopez-Furelos A, Leiro-Vidal JM, Salas-Sánchez AÁ, Ares-Pena FJ, López-Martín ME.	2017-10-04	Effect	Sinusoidal			RF Signal Generator and Transverse Electromagnetic (TEM) Cell	https://www.ncbi.nlm.nih.gov/pubmed/27589837	UHF (300 MHz-3 GHz) studies	Ministry of Economy and Competitiveness through Project TEC- 2011-24441.	0	1
3107	Radiofrequency radiation emitted from Wi-Fi (2.4 GHz) causes impaired insulin secretion and increased oxidative stress in rat pancreatic islets	Masoumi A, Karbalaei N, Mortazavi SMJ, Shabani M.	2018-06-18	Effect	Pulsed	Real	1	WiFi	https://www.ncbi.nlm.nih.gov/pubmed/29913098	UHF (300 MHz-3 GHz) studies	Shiraz University of Medical Sciences, Shiraz, Iran (grant no. 12632); it is a part of Ms. Thesis by Ali Masoumi	0	1
3108	Activation of the TRPV1 Thermoreceptor Induced by Modulated or Unmodulated 1800 MHz Radiofrequency Field Exposure	Ruigrok HJ, Arnaud-Cormos D, Hurtier A, Poque E, de Gannes FP, Ruffié G, Bonnaudin F, Lagroye I, Sojic N, Arbault S, Lévêque P, Veyret B, Percherancier Y.	2018-01-01	No Effect	Continuous			Transverse Electromagnetic (TEM) Cell	https://www.ncbi.nlm.nih.gov/pubmed/29059001	UHF (300 MHz-3 GHz) studies	European Community’s Seventh Framework Programme (FP7/2007-013) under grant agreement no. 603794 (the GERONIMO project), from the ‘‘Agence de l’Environnement et de la Maˆıtrise de l’Energie’’ (ADEME) and the ‘‘Conseil Re ́gional d’Aquitaine’’.	1	0
3120	Analysis of the Genotoxic Effects of Mobile Phone Radiation using Buccal Micronucleus Assay: A Comparative Evaluation	Banerjee S, Singh NN, Sreedhar G, Mukherjee S.	2016-03-01	Effect	Pulsed	Real		Mobile Phone	https://www.ncbi.nlm.nih.gov/pubmed/27135009	UHF (300 MHz-3 GHz) studies	No stated	0	1
3122	Short-term 2.1 GHz radiofrequency radiation treatment induces significant changes on the auditory evoked potentials in adult rats	Hidisoglu E, Kantar-Gok D, Ozen S, Yargicoglu P.	2018-06-25	Effect	Pulsed	Simulated	1	Mobile Phone GSM Simulated	https://www.ncbi.nlm.nih.gov/pubmed/29939075	UHF (300 MHz-3 GHz) studies	Akdeniz University Research Foundation, Turkey	0	1
3124	Human Fibroblasts In Vitro Exposed to 2.45 GHz Continuous and Pulsed Wave Signals: Evaluation of Biological Effects with a Multimethodological Approach	Regalbuto E, Anselmo A, De Sanctis S, Franchini V, Lista F, Benvenuto M, Bei R, Masuelli L, D'Inzeo G, Paffi A, Trodella E, Sgura A.	2020-09-25	Effect	Continuous			RF Signal Generator	https://pubmed.ncbi.nlm.nih.gov/32992895/	UHF (300 MHz-3 GHz) studies	Italian Ministry of Defense, SEGREDIFESA/DNA—5th Department of Technological Innovation (GREAM 2 Project). Military Funded	1	0
3134	Terrestrial Trunked Radio (TETRA) exposure of neuronal in vitro networks	Kohler T, Wölfel M, Ciba M, Bochtler U, Thielemann C.	2018-04-01	No Effect	Pulsed			Transverse Electromagnetic (TEM) Cell	https://www.ncbi.nlm.nih.gov/pubmed/29272813	UHF (300 MHz-3 GHz) studies	Federal Ministry of Education and Research of Germany (BMBF) for its financial support. Funding number: 03FH026I3 TETRACELL.	1	0
3136	Normothermic Microwave Irradiation Induces Death of HL-60 Cells through Heat-Independent Apoptosis	Asano M, Tanaka S, Sakaguchi M, Matsumura H, Yamaguchi T, Fujita Y, Tabuse K.	2017-09-12	Effect	Not Stated			Semiconductor Microwave Oscillator	https://www.ncbi.nlm.nih.gov/pubmed/28900243	UHF (300 MHz-3 GHz) studies	Japan Society for the Promotion of Science (JSPS) KAKENHI Grant http://www.jsps.go.jp/english/	1	0
3146	The Protective Effect of Autophagy on DNA Damage in Mouse Spermatocyte-Derived Cells Exposed to 1800 MHz Radiofrequency Electromagnetic Fields	Li R, Ma M, Li L, Zhao L, Zhang T, Gao X, Zhang D, Zhu Y, Peng Q, Luo X, Wang M.	2018-07-01	Effect	Pulsed	Simulated		Mobile Phone GSM (Talk) Simulated	https://www.ncbi.nlm.nih.gov/pubmed/29996120	UHF (300 MHz-3 GHz) studies	Natural Science Foundation of China (No. 81402656), Chongqing Municipal Science and Technology Commission Fundamental Research funded project	1	0
3154	Effect of radiofrequency electromagnetic fields (RF-EMFS) from mobile phones on nickel release from orthodontic brackets: An in vitro study	Mortazavi SMJ, Paknahad M, Khaleghi I, Eghlidospour M.	2018-08-12	Effect	Pulsed	Simulated		Mobile Phone GSM Simulated	https://www.ncbi.nlm.nih.gov/pubmed/30007574	UHF (300 MHz-3 GHz) studies	Vice-Chancellory of Research Shiraz University of Medical Science for supporting this research (Grant #10039)	1	0
3162	The Effects of Epigallocatechin Gallate and N-Acetylcysteine on Mobile Phone-Induced Oxidative Stress in Guinea Pigs	Kismali G, Ozgur E, Sayiner S, Alpaslan B, Guler G, Seyhan N, Sel T.	2009-08-01	Effect	Pulsed	Real	1	Mobile Phone GSM	http://www.medwelljournals.com/abstract/?doi=javaa.2009.959.961	UHF (300 MHz-3 GHz) studies	No stated	0	1
3164	Effect of acute exposure to radiofrequency electromagnetic fields emitted by a mobile phone (GSM 900 MHz) on electrodermal responsiveness in healthy human	Selmaoui B, Andrianome S, Ghosn R, de Seze R.	2018-07-20	No Effect	Pulsed	Real		Mobile Phone GSM	https://www.ncbi.nlm.nih.gov/pubmed/30028653	UHF (300 MHz-3 GHz) studies	Institut National de l’Environnement Industriel et des Risques (INERIS) and the program 190 ‘post-Grenelle’ for the ‘pôle applicatif en Toxicologie et Ecotoxicologie’ of the French Ministry of Ecology and Sustainable Development	0	1
3165	Exposure to Global System for Mobile Communication 900 MHz Cellular Phone Radiofrequency Alters Growth, Proliferation and Morphology of Michigan Cancer Foundation-7 Cells and Mesenchymal Stem Cells	Shahbazi-Gahrouei D, Hashemi-Beni B, Moradi A, Aliakbari M, Shahbazi-Gahrouei S.	2018-06-19	Effect	Pulsed	Real		Mobile Phone GSM	https://www.ncbi.nlm.nih.gov/pubmed/30034669	UHF (300 MHz-3 GHz) studies	Isfahan University of Medical Sciences	1	0
3166	Impact of Long-Term RF-EMF on Oxidative Stress and Neuroinflammation in Aging Brains of C57BL/6 Mice	Jeong YJ, Son Y, Han NK, Choi HD, Pack JK, Kim N, Lee YS, Lee HJ.	2018-07-19	No Effect	Pulsed	Simulated		Mobile Phone W-CDMA Simulated	https://www.ncbi.nlm.nih.gov/pubmed/30029554	UHF (300 MHz-3 GHz) studies	Institute for Information & communications Technology Promotion (IITP) grant funded by the Korea government (MSIT) Study on the EMF Exposure Control in Smart Society.	0	1
3181	Effect of cell phone radiofrequency radiation on body temperature in rodents: Pilot studies of the National Toxicology Program's reverberation chamber exposure system	Wyde ME, Horn TL, Capstick MH, Ladbury JM, Koepke G, Wilson PF, Kissling GE, Stout MD, Kuster N, Melnick RL, Gauger J, Bucher JR, McCormick DL.	2018-04-01	Effect	Pulsed	Simulated		Mobile Phone GSM Simulated	https://www.ncbi.nlm.nih.gov/pubmed/29537695	UHF (300 MHz-3 GHz) studies	National Toxicology Program; National Institute of Environmental Health Sciences; Research Triangle Park; grant number: NC 27709.	0	1
3188	Protective effect of 1950 MHz electromagnetic field in human neuroblastoma cells challenged with menadione	Falone S, Sannino A, Romeo S, Zeni O, Santini SJ, Rispoli R, Amicarelli F, Scarfì MR.	2018-09-05	Effect	Pulsed	Simulated		Mobile phone UMTS Simulated	https://www.ncbi.nlm.nih.gov/pubmed/30185877	UHF (300 MHz-3 GHz) studies	Not Stated	1	0
3191	Structural and functional correlates of smartphone addiction	Horvath J, Mundinger C, Schmitgen MM, Wolf ND, Sambataro F, Hirjak D, Kubera KM, Koenig J, Christian Wolf R.	2020-02-01	Effect	Pulsed	Real		Mobile Phone GSM	https://www.ncbi.nlm.nih.gov/pubmed/32062336	UHF (300 MHz-3 GHz) studies	No commercial or financial relationships that could be construed as a potential conflict of interest.	0	1
3202	The effect of exposure to 1800 MHz radiofrequency radiation on epidermal growth factor, caspase-3, Hsp27 and p38MAPK gene expressions in the rat eye	Eker ED, Arslan B, Yildirim M, Akar A, Aras N.	2018-09-13	Effect	Pulsed	Simulated		Mobile Phone GSM Simulated	https://www.ncbi.nlm.nih.gov/pubmed/30226071	UHF (300 MHz-3 GHz) studies	Department of Scientific Research Projects, Mersin University	0	1
3203	Modulatory effect of 900 MHz radiation on biochemical and reproductive parameters in rats	Narayanan SN, Lukose ST, Arun G, Mohapatra N, Pamala J, Concessao PL, Jetti R, Kedage V, Nalini K, Bhat PG.	2018-09-13	Effect	Pulsed	Real	1	Mobile Phone GSM	https://www.ncbi.nlm.nih.gov/pubmed/30226070	UHF (300 MHz-3 GHz) studies	Indian Council of Medical Research (ICMR), New Delhi	0	1
3217	Effects of radiofrequency electromagnetic radiation emitted from a mobile phone base station on the redox homeostasis in different organs of Swiss albino mice	Zosangzuali M, Lalremruati M, Lalmuansangi C, Nghakliana F, Pachuau L, Bandara P, Zothan Siam.	2021-03-09	Effect	Pulsed	Real	1	Mobile Phone Base Station	https://pubmed.ncbi.nlm.nih.gov/33687298/	UHF (300 MHz-3 GHz) studies	We thank the Department of Science and Technology (DST), Government of India, for providing Inspire fellowship to Mary Zosangzuali (DST/INSPIRE Fellowship/[IF170375]). We also thank the University Grant Commission, Ministry of Tribal Affairs, Government of India, for providing fellowship to C. Lalmuansangi (201718-NFST-MIZ-00902) and Marina Lalremruati (UGC-MZU Fellowship	0	1
3227	Evidence of oxidative stress after continuous exposure to Wi-Fi radiation in rat model	Kamali K, Taravati A, Sayyadi S, Gharib FZ, Maftoon H.	2018-10-21	Effect	Pulsed	Real	1	WiFi	https://www.ncbi.nlm.nih.gov/pubmed/30343375	UHF (300 MHz-3 GHz) studies	Not Stated	0	1
3229	Probing the Origins of 1,800 MHz Radio Frequency Electromagnetic Radiation Induced Damage in Mouse Immortalized Germ Cells and Spermatozoa in vitro	Houston BJ, Nixon B, King BV, Aitken RJ, De Iuliis GN.	2018-09-21	Effect	Continuous		1	RF Signal Generator	https://www.ncbi.nlm.nih.gov/pubmed/30298125	UHF (300 MHz-3 GHz) studies	Australian Research Council Discovery Project scheme (grant number DP110103951) to RA and BK. BH is the recipient of an Australian Postgraduate Award Ph.D. scholarship.	1	0
3235	Melatonin attenuates radiofrequency radiation (900 MHz)-induced oxidative stress, DNA damage and cell cycle arrest in germ cells of male Swiss albino mice	Pandey N, Giri S.	2018-03-21	Effect	Pulsed	Simulated	1	Mobile Phone GSM Simulated	https://www.ncbi.nlm.nih.gov/pubmed/29562845	UHF (300 MHz-3 GHz) studies	No financial support for the research, authorship, and/or publication of this article. Fellowship support by University grant commission, New Delhi (India) to NP is thankfully acknowledged.	0	1
3239	Impact of electromagnetic radiation exposure during pregnancy on embryonic skeletal development in rats	Alchalabi ASH, Aklilu E, Aziz AR, Rahim H ,Ronald SH, Malek MF, Khan MA.	2018-01-29	Effect	Pulsed	Simulated		Mobile Phone GSM Simulated	http://www.apjr.net/article.asp?issn=2305-0500;year=2017;volume=6;issue=3;spage=104;epage=111;aulast=Alchalabi;type=0	UHF (300 MHz-3 GHz) studies	Faculty of Veterinary Medicine of Universiti Malaysia Kelantan	0	1
3243	Possible effects of radiofrequency electromagnetic fields on in vivo C6 brain tumors in Wistar rats	Ouadah NS, Lecomte A, Robidel F, Olsson A, Deltour I, Schüz J, Blazy K, Villégier AS.	2018-11-12	Effect	Pulsed	Simulated		Mobile Phone GSM Simulated	https://www.ncbi.nlm.nih.gov/pubmed/?term=Ouadah%20NS%5BAuthor%5D&cauthor=true&cauthor_uid=30421158	UHF (300 MHz-3 GHz) studies	French National Research Program for Environmental and Occupational Health of ANSES [2014/2 RF/002] and French Ministry of Ecology [Program 190].	0	1
3246	Effect of low-level 1800 MHz RF radiation on the rat sciatic nerve and the protective role of paricalcitol	Comelekoglu U, Aktas S, Demirbag B, Karagul MI, Yalin S, Yildirim M, Akar A, Korunur Engiz B, Sogut F, Ozbay E.	2018-10-16	Effect	Pulsed	Simulated	1	Mobile Phone GSM Simulated	https://www.ncbi.nlm.nih.gov/pubmed/30328127	UHF (300 MHz-3 GHz) studies	Not Stated	0	1
3253	The chronic effect of pulsed 1800 MHz electromagnetic radiation on amino acid neurotransmitters in three different areas of juvenile and young adult rat brain	Ahmed NA, Radwan NM, Aboul Ezz HS, Khadrawy YA, Salama NA.	2018-10-21	Effect	Pulsed	Simulated		Mobile Phone Simulated	https://www.ncbi.nlm.nih.gov/pubmed/30345898	UHF (300 MHz-3 GHz) studies	Sector of “International Cooperation with USA”, Foreign Ministry, Egypt.	0	1
3254	Effects of mobile phone prolonged radiation on kidney cells; an in-vitro study	Mahmoudi G, Nikzad S, Mehrpouyan M, Moslehi M, Baradaran-Ghahfarokhi M, Dashty.	2018-05-06	Effect	Not Stated			RF Signal Generator	http://www.journalrip.com/Abstract/jrip-516	UHF (300 MHz-3 GHz) studies	The study was supported by a grant from Sabzevar University of Medical Sciences (grant #1394-43).	1	0
3255	Effects of mobile phone EMF exposure on serum hepcidin and iron status in male albino rats	El-Maleky NF, Ebrahim RH.	2018-11-02	Effect	Pulsed	Real		Mobile Phone GSM	https://www.ncbi.nlm.nih.gov/pubmed/30388901	UHF (300 MHz-3 GHz) studies	No Conflict of Interest Stated	0	1
3275	RF Radiation–Induced Changes in the Prenatal Development of Mice	Magras IN, Xenos TD.	1997-01-01	Effect	Continuous			VHF to UHF	https://www.ncbi.nlm.nih.gov/pubmed/9261543	UHF (300 MHz-3 GHz) studies	Department of Telecommunications of the School of Electrical Engineering and Computer Engineering	0	1
3293	Bio-physical effects of radiofrequency electromagnetic radiation (RF-EMR) on blood parameters, spermatozoa, liver, kidney and heart of albino rats	Adebay EA, Adeeyoa O, Ogundirana MA. Olabisib O.	2018-11-15	Effect	Pulsed	Real		Mobile Phone Base Station	https://www.sciencedirect.com/science/article/pii/S1018364717308789	UHF (300 MHz-3 GHz) studies	Not Stated	0	1
3296	Dataset on significant role of Candesartan on cognitive functions in rats having memory impairment induced by electromagnetic waves	Nasser M, Chedid P, Salami A, Khalifeh M, El Shamieh S, Joumaa WH.	2018-11-26	Effect	Pulsed	Simulated		Mobile Phone GSM Simulated	https://www.ncbi.nlm.nih.gov/pubmed/30547063	UHF (300 MHz-3 GHz) studies	Not Known	0	1
3301	1800 MHz radiofrequency fields inhibits testosterone production via CaMKI /RORα pathway	Qin F, Cao H, Yuan H, Guo W, Pei H, Cao Y, Tong J.	2018-10-01	Effect	Continuous			Transverse Electromagnetic (TEM) Cell	https://www.ncbi.nlm.nih.gov/pubmed/30125682	UHF (300 MHz-3 GHz) studies	National Natural Science Foundation of China , the China Postdoctoral Science Foundation the Jiangsu Key Lab of senile disease prevention and translational medicine, the Suzhou Science and Technology Development project and the Priority Academic Program Development of Jiangsu Higher Education Institutions.	0	1
3303	Alteration of adaptive behaviors of progeny after maternal mobile phone exposure	Petitdant N, Lecomte A, Robidel F, Gamez C, Blazy K, Villégier AS.	2018-04-01	Effect	Pulsed	Simulated		Mobile Phone GSM Simulated	https://www.ncbi.nlm.nih.gov/pubmed/29397508	UHF (300 MHz-3 GHz) studies	Agency for Food, Environmental, and Occupational Health and Safety INFLAREF- N°EST-2012/2/021 and Sby the French Ministry of Ecology Program 190.	0	1
3304	Modulation of brain functional connectivity by exposure to LTE (4G) cell phone radiation	Wei Y, Yang J, Chen Z, Wu T, Lv B.	2018-12-18	Effect	Pulsed	Real		Mobile Phone GSM	https://onlinelibrary.wiley.com/doi/full/10.1002/bem.22165	UHF (300 MHz-3 GHz) studies	National S&T Major Project; National Natural Science Foundation of China	0	1
3305	Cellular Phone Irradiation of the Head Affects Heart Rate Variability Depending on Inspiration/Expiration Ratio	Béres S, Németh Á, Ajtay Z, Kiss I, Németh B, Hejjel L.	2018-09-01	Effect	Pulsed	Real		Mobile Phone GSM	https://www.ncbi.nlm.nih.gov/pubmed/30150437	UHF (300 MHz-3 GHz) studies	Balázs Németh was supported by the ÚNKP-17-3-III New National Excellence Program of the Ministry of Human Capacities, Hungary	0	1
3308	Possible effects of radiofrequency EMF on in vivo C6 brain tumors in Wistar rats	Ouadah NS, Lecomte A, Robidel F, Olsson A, Deltour I, Schüz J, Blazy K, Villégier AS.	2018-12-12	Uncertain Effect	Pulsed	Real		Mobile Phone GSM	https://www.ncbi.nlm.nih.gov/pubmed/30421158	UHF (300 MHz-3 GHz) studies	French National Research Program for Environmental and Occupational Health of ANSES [2014/2 RF/002] and French Ministry of Ecology.	0	1
3328	Exposure to cell phone radiofrequency changes corticotrophin hormone levels and histology of the brain and adrenal glands in male Wistar rat	Shahabi S, Hassanzadeh Taji I, Hoseinnezhaddarzi M, Mousavi F, Shirchi S, Nazari A, Zarei H, Pourabdolhossein F.	2018-12-01	Effect	Pulsed	Real		Mobile Phone 2G GSM	https://www.ncbi.nlm.nih.gov/pubmed/30627371	UHF (300 MHz-3 GHz) studies	Financially supported by grants from the research and technology committee, Babol University of Medical Sciences, Babol, Iran.	0	1
3331	Effect of mobile phone radiofrequency on hippocampal ca3 neurons	Bolla SR.	2015-12-30	Effect	Pulsed	Real		Mobile Phone CDMA	https://www.ijmhr.org/ijar.3.3/IJAR.2015.190.pdf	UHF (300 MHz-3 GHz) studies	No Conflict of Interest Stated	0	1
3336	Induction of Autophagy in the Striatum and Hypothalamus of Mice after 835 MHz Radiofrequency Exposure	Kim JH, Huh YH, Kim HR.	2016-04-13	Effect	Continuous			Simulated by a signal generator	https://www.ncbi.nlm.nih.gov/pubmed/27073885	UHF (300 MHz-3 GHz) studies	Research was supported by Basic Science Research Program through the National Research Foundation of Korea (NRF) funded by the Ministry of Science, ICT, and Future Planning	0	1
3338	Effect of Electromagnetic Waves from Mobile Phones on Spermatogenesis in the Era of 4G-LTE	Oh JJ, Byun SS, Lee SE, Choe G, Hong SK.	2018-01-29	Effect	Continuous			Simulated by a signal generator	https://www.hindawi.com/journals/bmri/2018/1801798/	UHF (300 MHz-3 GHz) studies	SNUBH (Seoul National University Bundang Hospital, SK Telecom commissioned) Research Fund (Grant no. SNUBH-06-2014-165).	0	1
3339	The effects of radio-frequency electromagnetic fields on T cell function during development	Ohtani S, Ushiyama A, Maeda M, Ogasawara Y, Wang J, Kunugita N, Ishii K.	2015-04-02	No Effect	Continuous	Simulated		Mobile Phone W-CDMA Simulated	https://www.ncbi.nlm.nih.gov/pubmed/25835473	UHF (300 MHz-3 GHz) studies	Funding to pay the Open Access publication charges for this article was provided by a Grant from the Ministry of Internal Affairs and Communications, Japan. This work was also supported by a Grant from the Ministry of Internal Affairs and Communications, Japan	0	1
3343	Evaluation of the 900 MHz Radiofrequency Radiation Effects on the Antimicrobial Susceptibility and Growth Rate of Klebsiella pneumoniae	Taheri M, Mortazav SMJ, Moradi M, Mansouri S, Hatam GR, Nouri F.	2017-01-01	Effect	Pulsed	Simulated		Mobile Phone GSM (Talk) Simulated	https://www.researchgate.net/publication/313229248_Evaluation_of_the_900_MHz_Radiofrequency_Radiation_Effects_on_the_Antimicrobial_Susceptibility_and_Growth_Rate_of_Klebsiella_pneumoniae	UHF (300 MHz-3 GHz) studies	Research Deputy of Kerman University of Medical Sciences, Kerman, Iran.	1	0
3347	Early exposure to radiofrequency electromagnetic fields at 1850 MHz affects auditory circuits in early postnatal mice	Kim JH, Huh YH, Lee JH, Jung JY, Ahn SC, Kim HR.	2019-01-23	No Effect	Not Stated			Simulated by a signal generator (MW HORN)	https://www.ncbi.nlm.nih.gov/pubmed/30674958	UHF (300 MHz-3 GHz) studies	Korea Basic Science Research Program through the National Research Foundation of Korea (NRF) funded by the Ministry of Education, Science and Technology	0	1
3350	Effects of radiofrequency electromagnetic radiation (RF-EMF) on honey bee queen development and mating success	Odemer R, Odemer F.	2019-01-15	Effect	Pulsed	Real		Mobile Phone GSM	https://www.ncbi.nlm.nih.gov/pubmed/30682608	UHF (300 MHz-3 GHz) studies	This research did not receive any specific grant from funding agencies in the public, commercial, or not-for-profit sectors	0	1
3352	Decreased dopamine in striatum and difficult locomotor recovery from MPTP insult after exposure to radiofrequency electromagnetic fields	Kim JH, Lee CH, Kim HG, Kim HR.	2019-02-04	Effect	Not Stated			Simulated by a signal generator	https://www.ncbi.nlm.nih.gov/pubmed/30718744	UHF (300 MHz-3 GHz) studies	Dankook University in 2017 (R201601332) and Basic Science Research Program through the National Research Foundation of Korea (NRF) funded by the Ministry of Education (NRF-2017R1D1A1B03029527) awarded to HRK.	0	1
3359	Diverse Radiofrequency Sensitivity and Radiofrequency Effects of Mobile or Cordless Phone near Fields Exposure in Drosophila melanogaster	Geronikolou S, Zimeras S, Davos CH, Michalopoulos I, Tsitomeneas S.	2014-11-17	Effect	Continuous			DCS Digital Wireless Coms simulated	https://www.ncbi.nlm.nih.gov/pubmed/25402465	UHF (300 MHz-3 GHz) studies	The authors have no support or funding to report. The authors have declared that no competing interests exist.	0	1
3363	Protective effects of melatonin and omega-3 on the hippocampus and the cerebellum of adult Wistar albino rats exposed to electromagnetic fields	Altun G, Kaplan S, Deniz OG, Kocacan SE, Canan S, Davis D, Marangoz C.	2017-06-01	Effect	Pulsed	Simulated	1	Mobile Phone GSM Simulated	https://www.ncbi.nlm.nih.gov/pubmed/30023259	UHF (300 MHz-3 GHz) studies	Ondokuz Mayıs University, project management office (PYO. TIP.1904.13.023) and by Environmental Health Trust, USA.	0	1
3365	Bio-geometrical shapes: a new option for protection against neurodegenerative insult of Wi-Fi radiation	Sharaf NE, El-Sawy MS, AHmed HH, Metwally NM, El-Mishad AM.	2018-09-30	Effect	Pulsed		1	WiFi	https://www.isisn.org/BR15(3)2018/2481-2488-15(3)2018%20BR18-291.pdf	UHF (300 MHz-3 GHz) studies	National Research Centre (Egypt) under grant number P100804.	0	1
3370	Male fertility and its association with occupational and mobile phone towers hazards: An analytic study	Al-Quzwin OF, Al-Taee HA, Al-Shaikhc SF.	2016-12-01	Effect	Pulsed	Real		Mobile Phone Base Station	https://www.sciencedirect.com/science/article/pii/S1110569016300127	UHF (300 MHz-3 GHz) studies	No Conflict of Interest Stated	0	1
3398	A study on haematological and physiological effects of electromagnetic radiation from global system of communication	Imran MR, Shweta K, Aryan Singh, Mohd Abrar Hassan.	2018-05-17	Effect	Continuous	Simulated		Mobile Phone GSM Simulated	https://www.innovativepublication.com/journal-article-full-text/IJCAP/7245	UHF (300 MHz-3 GHz) studies	Bhaskar Medical College	0	1
3399	The Assessment of Mercury Released from Dental Amalgams after Exposure to Wi-Fi and X-Ray Radiation in Artificial Saliva	Hosseini MA, Mehdizadeh A, Sanipour L ,Afrasyabi MR, Shiravani MH, Asmarian N, Zamani A.	2018-02-01	Effect	Pulsed			WiFi	https://www.researchgate.net/publication/322729777_The_Assessment_of_Mercury_Released_from_Dental_Amalgams_after_Exposure_to_Wi-Fi_and_X-Ray_Radiation_in_Artificial_Saliva	UHF (300 MHz-3 GHz) studies	Research Grants from Shiraz University of Medical Sciences	1	0
3401	Effect of radiofrequency radiation from Wi-Fi devices on mercury release from amalgam restorations	Paknahad M, Mortazavi SM, Shahidi S, Mortazavi G, Haghani M.	2016-07-13	Effect	Pulsed	Real		WiFi	https://www.ncbi.nlm.nih.gov/pubmed/27418965	UHF (300 MHz-3 GHz) studies	This study was approved by the medical ethics committee of Shiraz University of Medical Sciences. No conflict of interest.	1	0
3402	2.45-GHz Microwave Radiation Impairs Hippocampal Learning and Spatial Memory: Involvement of Local Stress Mechanism-Induced Suppression of iGluR/ERK/CREB Signaling	Shahin S, Banerjee S, Swarup V, Singh SP, Chaturvedi CM.	2017-10-23	Effect	Continuous			RF Signal Generator	https://www.ncbi.nlm.nih.gov/pubmed/29069439	UHF (300 MHz-3 GHz) studies	This work was funded by a research grant (5/10/FR/13/2010- RHN) from the Indian Council of Medical Research (ICMR), New Delhi, India to CMC, ICMR Senior Research Fellowship (45/2/2012-PHY/BMS) to Ms Saba Shahin and CSIR Senior Research Fellowship (09/013(0339)/2010-EMR-I) to Mr Somanshu Banerjee.	0	1
3406	The Effects of Mobile Phone Radiofrequency Electromagnetic Fields on β-Amyloid-Induced Oxidative Stress in Human and Rat Primary Astrocytes	Tsoy A, Saliev T, Abzhanova E, Turgambayeva A, Kaiyrlykyzy A, Akishev M, Saparbayev S, Umbayev B, Askarova S.	2019-04-03	Effect	Not Stated		1	Microwave	https://www.ncbi.nlm.nih.gov/pubmed/30953670	UHF (300 MHz-3 GHz) studies	“Therapeutic potential of electromagnetic fields for treatment of Alzheimer’s disease” (Grant N 0115RK00342; Ministry of Education and Science Republic of Kazakhstan) and «Studying of adipose tissue hormone adiponectin expression as a potential marker of age-related dementia» (Grant N AP05133266; Ministry of Education and Science Republic of Kazakhstan). No Conflict of interst stated	1	0
3408	Direct and indirect effects of exposure to 900 MHz GSM radiofrequency electromagnetic fields on CHO cell line: Evidence of bystander effect by non-ionizing radiation	Jooyan N, Goliaei B, Bigdeli B, Faraji-Dana R, Zamani A, Entezami M, Mortazavi SMJ.	2019-04-26	Effect	Pulsed	Simulated	1	Mobile Phone GSM (Talk) Simulated	https://www.ncbi.nlm.nih.gov/pubmed/31036329	UHF (300 MHz-3 GHz) studies	This research did not receive any specific grant from funding agencies in the public, commercial, or not-for-profit sectors.	1	0
3411	Assessment of genotoxicity and genomic instability in rat primary astrocytes exposed to 872 MHz radiofrequency radiation and chemicals	Herrala M, Mustafa E, Naarala J, Juutilainen J.	2018-10-01	Uncertain Effect	Continuous	Simulated		Mobile Phone GSM Simulated	https://www.ncbi.nlm.nih.gov/pubmed/29528766	UHF (300 MHz-3 GHz) studies	Funding from the European Community’s Seventh Framework Programme (FP7/2007-2013) under grant agreement no 603794 –the GERONIMO project.	1	0
3419	The effects of radiofrequency radiation on mice fetus weight, length and tissues	Alimohammadi I, Ashtarinezhad A, Asl BM, Masruri B, Moghadasia N.	2018-06-30	Effect	Pulsed	Simulated		Mobile Phone GSM Simulated	https://www.ncbi.nlm.nih.gov/pmc/articles/PMC6141437/	UHF (300 MHz-3 GHz) studies	Iran University of Medical Sciences	0	1
3422	Appraisal of immediate and late effects of mobile phone radiations at 2100 MHz on mitotic activity and DNA integrity in root meristems of Allium cepa	Chandel S, Kaur S, Issa M, Singh HP, Batish DR, Kohli RK.	2019-05-21	Effect	Continuous			Simulated by a signal generator	https://www.ncbi.nlm.nih.gov/pubmed/31115694	UHF (300 MHz-3 GHz) studies	Science and Engineering Research Board, Department of Science and Technology, New Delhi (India) for financial support. No conflict of interest stated.	0	1
3423	Effect of 900-, 1800-, and 2100-MHz radiofrequency radiation on DNA and oxidative stress in brain	Alkis ME, Bilgin HM, Akpolat V, Dasdag S, Yegin K, Yavas MC, Akdag MZ.	2019-01-22	Effect	Not Stated		1	RF Signal Generator	https://www.ncbi.nlm.nih.gov/pubmed/30669883	UHF (300 MHz-3 GHz) studies	This work was supported by the Dicle University [grant number Tıp.16.008].	0	1
3424	Radiofrequency radiation at 2.856 GHz does not affect key cellular endpoints in neuron-like PC12 cells	Zhou H, Dong G, Zheng W, Wang S, Wang L, Zhi W, Wang C.	2018-11-27	No Effect	Pulsed			Microwave	https://www.ncbi.nlm.nih.gov/pubmed/30482060	UHF (300 MHz-3 GHz) studies	National Science and Technology Major Project of the Ministry of Science and Technology of China .	1	0
3437	Study of the Cardiovascular Effects of Exposure to Electromagnetic Field	Mohamed FA, Azza A. Ahmed, *Bataa M.A. El- Kafoury, Noha N. Lasheen.	2011-01-01	Effect	Pulsed	Real	1	Mobile Phone GSM	https://www.researchgate.net/publication/298833487_Study_of_the_Cardiovascular_Effects_of_Exposure_to_Electromagnetic_Field	UHF (300 MHz-3 GHz) studies		0	1
3442	Aluminium foil dampened the adverse effect of 2100 MHz mobile phone-induced radiation on the blood parameters and myocardium in rats	Kalanjati VP, Purwantari KE, Prasetiowati L.	2019-04-01	Effect	Pulsed	Real		Mobile Phone GSM	https://www.ncbi.nlm.nih.gov/pubmed/30806932	UHF (300 MHz-3 GHz) studies	Universitas Airlangga.	0	1
3450	Microwave alteration of the blood-brain barrier system of rats	Oscar FJ, Hawkins TD.	1977-05-06	Effect	Continuous			Microwave	https://www.ncbi.nlm.nih.gov/pubmed/861720	UHF (300 MHz-3 GHz) studies	American University, George Catravas of AFFRI, Elliot Postow of Naval Bureau of Medicine and Surgery, and Allan Frey of Randomline Inc.	0	1
3453	Synergistic Effect of Radiofrequency Electromagnetic Fields of Dental Light Cure Devices and Mobile Phones Accelerates the Microleakage of Amalgam Restorations: An in vitro Study	Mortazavi SMJ, Dehghani Nazhvani A, Paknahad M.	2019-04-01	Effect	Pulsed	Simulated		Mobile Phone GSM Simulated	https://www.ncbi.nlm.nih.gov/pubmed/31214528	UHF (300 MHz-3 GHz) studies	This study was supported by the Ionising and Non-ionising Radiation Protection Research Centre (INIRPRC), Shiraz University of Medical Sciences (SUMS), Shiraz, Iran.	1	0
3456	Assessment of the effects of radiofrequency radiation on human colon epithelium cells	Tomruk A, Terzi YK, Guler GO.	2019-04-26	Effect	Continuous	Simulated	1	Mobile Phone GSM Simulated	https://www.ncbi.nlm.nih.gov/pubmed/31023054	UHF (300 MHz-3 GHz) studies	Gazi University Faculty of Medicine	1	0
3462	Exposure to mobile phone radiations at 2350 MHz incites cyto- and genotoxic effects in root meristems of Allium cepa	Chandel S, Kaur S, Issa M, Singh HP, Batish DR, Kohli RK.	2019-01-05	Effect	Continuous			Simulated by a signal generator	https://www.ncbi.nlm.nih.gov/pubmed/31297205	UHF (300 MHz-3 GHz) studies	Science and Engineering Research Board, Department of Science and Technology, New Delhi (India) for financial support. No conflict of interest stated.	0	1
3469	Effects of radiofrequency electromagnetic field exposure on neuronal differentiation and mitochondrial function in SH-SY5Y cells	von Niederhäusern N, Ducray A, Zielinski J, Murbach M, Mevissen M.	2019-07-24	No Effect	Pulsed	Simulated		Mobile Phone GSM Simulated	https://www.ncbi.nlm.nih.gov/pubmed/?term=von%20Niederhäusern%20N%5BAuthor%5D&cauthor=true&cauthor_uid=31351122	UHF (300 MHz-3 GHz) studies	Swiss Research Foundation for Electricity and Mobile Communication, Swiss Federal Institute of Technology (ETH)	1	0
3471	Treatment with 3-Aminobenzamide Negates the Radiofrequency-Induced Adaptive Response in Two Cell Models	Sannino A, Zeni O, Romeo S, Lioi MB, Scarfì MR.	2019-08-02	Effect	Continuous	Simulated		UMTS simulated	https://www.ncbi.nlm.nih.gov/pubmed/31382475	UHF (300 MHz-3 GHz) studies	The research support from the Italian National Research Council, IREA, Italy is gratefully acknowledged.	1	0
3474	Decreased spontaneous electrical activity in neuronal networks exposed to radiofrequency 1,800 MHz signals	El Khoueiry C, Moretti D, Renom R, Camera F, Orlacchio R, Garenne A, Poulletier De Gannes F, Poque-Haro E, Lagroye I, Veyret B, Lewis N.	2018-12-01	Effect	Pulsed	Simulated		Mobile Phone GSM Simulated	https://www.ncbi.nlm.nih.gov/pubmed/30133383	UHF (300 MHz-3 GHz) studies	French ANSES agency (2015- EST-15RF-19 MOTUS project).	1	0
3477	Exposure to 1800 MHz GSM-like radiofrequency electromagnetic field reduces follicular development and overall fertility of female rats	Ali SH, Alchalabi, Erkihun Aklilu, Abd Rahman Aziz1, F. Malek, S. H. Ronald, Mohd Azam Khan	2015-01-01	Effect	Pulsed	Simulated	1	Mobile Phone GSM Simulated	https://www.semanticscholar.org/paper/Exposure-to-1800-MHz-GSM-like-radiofrequency-field-Alchalabi-Aklilu/5aefc7735025717ade9bb8cfbe1f9691e894f83b	UHF (300 MHz-3 GHz) studies	Faculty of Veterinary Medicine, University Malaysia Kelantan.	0	1
3506	Report of final results regarding brain and heart tumors in Sprague-Dawley rats exposed from prenatal life until natural death to mobile phone radiofrequency field representative of a 1.8 GHz GSM base station environmental emission	Falcioni L, Bua L, Tibaldi E, Lauriola M, De Angelis L, Gnudi F, Mandrioli D, Manservigi M, Manservisi F, Manzoli I, Menghetti I, Montella R, Panzacchi S, Sgargi D, Strollo V, Vornoli A, Belpoggi F.	2018-08-01	Effect	Pulsed	Simulated		Mobile Phone GSM Simulated	https://www.ncbi.nlm.nih.gov/pubmed/29530389	UHF (300 MHz-3 GHz) studies	Ramazzini Institute, Bologna, Italy; Regional Agency for Prevention and the Environment (ARPA), Emilia-Romagna Region, Italy; Children With Cancer, UK; Fondazione Cassa di Risparmio, Bologna, Italy; National Institute for Insurance Against Injuries at Work (INAIL, ex ISPESL), Italy; Protezione Elaborazioni Industriali (P.E.I.), Bologna, Italy; Fondazione del Monte di Bologna e Ravenna, Bologna, I…	0	1
3508	Long-term exposure to 4G smartphone radiofrequency electromagnetic radiation diminished male reproductive potential by directly disrupting Spock3-MMP2-BTB axis in the testes of adult rats	Yu G, Tang Z, Chen H, Chen Z, Wang L, Cao H, Wang G, Xing J, Shen H, Cheng Q, Li D, Wang G, Xiang Y, Guan Y, Zhu Y, Liu Z, Bai Z.	2019-08-31	Effect	Pulsed	Real	1	Mobile Phone GSM	https://www.ncbi.nlm.nih.gov/pubmed/31514029	UHF (300 MHz-3 GHz) studies		0	1
3513	Early-Life Exposure to Pulsed LTE Radiofrequency Fields Causes Persistent Changes in Activity and Behavior in C57BL/6 J Mice	Broom KA, Findlay R, Addison DS, Goiceanu C, Sienkiewicz Z.	2019-09-15	Effect	Pulsed	Simulated		LTE Downlink simulated	https://www.ncbi.nlm.nih.gov/pubmed/31522469	UHF (300 MHz-3 GHz) studies	Department of Health and Social Care Policy Research Programme (Early Life Exposure to RadioFrequency Fields [ELERaFF])	0	1
3526	Melatonin Modulates NMDA-Receptor 2B/Calpain-1/Caspase-12 Pathways in Rat Brain After Long Time Exposure to GSM Radiation	Seymen CM, Ilgaz C, Erdogan D, Elmas C, Yar Saglam AS, Elmazoglu Z, Sirav Aral B, Take Kaplanoglu G.	2019-06-11	Effect	Pulsed	Simulated		Mobile Phone Simulated	https://www.ncbi.nlm.nih.gov/pubmed/31608966	UHF (300 MHz-3 GHz) studies	Gazi University, Faculty of Medicine	0	1
3527	Evaluation of the genotoxicity of cell phone radiofrequency radiation in male and female rats and mice following subchronic exposure	Smith-Roe SL, Wyde ME, Stout MD, Winters JW, Hobbs CA, Shepard KG, Green AS, Kissling GE, Shockley KR, Tice RR, Bucher JR, Witt KL.	2019-10-21	Effect	Pulsed	Simulated		Mobile Phone CDMA Simulated	https://www.ncbi.nlm.nih.gov/pubmed/31633839	UHF (300 MHz-3 GHz) studies	Grant sponsor: National Institute of Environmental Health Sciences; Grant number: ZIA ES103316-04. Grant sponsor: National Toxicology Program; Grant numbers: HHSN273201300009C; HHSN291200555544; N01-ES-35514	0	1
3537	Histopathological changes associated with oxidative stress induced by electromagnetic waves in rats' ovarian and uterine tissues	Alchalabi Ali SH, Rahim H, Aklilu E, Al-Sultan II, Aziz AR, Malek MF, Ronald SH, Khan MH.	2016-07-01	Effect	Pulsed	Simulated	1	Mobile Phone GSM Simulated	https://www.sciencedirect.com/science/article/pii/S2305050016300422	UHF (300 MHz-3 GHz) studies	No Conflict of Interest Stated	0	1
3539	Role of designed Bio-Geometrical forms in antagonizing neurobehavioral burden of Wi-Fi radiation: Evidence-based experimental study	Sharaf NE, Galal AF, El-Sawy MS, Shalby AB, Sayed AH, Ahmed HH	2018-09-01	Effect	Pulsed	Real	1	WiFi	https://biomedpharmajournal.org/vol12no3/role-of-designed-bio-geometrical-forms-in-antagonizing-neurobehavioral-burden-of-wi-fi-radiation-evidence-based-experimental-study/	UHF (300 MHz-3 GHz) studies	Not Stated	0	1
3541	Immunotropic effects in cultured human blood mononuclear cells exposed to a 900 MHz pulse-modulated microwave field	Szymański Ł, Sobiczewska E, Cios A, Szymanski P, Ciepielak M, Stankiewicz W.	2019-12-12	Uncertain Effect	Pulsed			Simulated by a signal generator	https://www.ncbi.nlm.nih.gov/pubmed/31832654	UHF (300 MHz-3 GHz) studies	Military Institute of Hygiene and Epidemiology.	1	0
3542	Effect of Exposure to a Radiofrequency Electromagnetic Field on Body Temperature in Anesthetized and Non-Anesthetized Rats	Kim HS, Lee YH, Choi HD, Lee AK, Jeon SB, Pack JK, Kim N, Ahn YH.	2019-12-11	Effect	Not Stated			Transverse Electromagnetic (TEM) Cell	https://www.ncbi.nlm.nih.gov/pubmed/31828817	UHF (300 MHz-3 GHz) studies	Grant sponsors: ICT R&D program of MSIT/IITP [2019‐0‐00102, A Study on Public Health and Safety in a Complex EMF Environment], and Basic Science Research Program through the National Research Foundation of Korea (NRF) funded by the Ministry of Education [NRF‐2018R1A6A3A11047957]. Conflict of interest: None.	0	1
3543	Impact of Cerebral Radiofrequency Exposures on Oxidative Stress and Corticosterone in a Rat Model of Alzheimer's Disease	Bouji M, Lecomte A, Gamez C, Blazy K, Villégier AS.	2019-11-25	Effect	Pulsed	Simulated	1	Mobile Phone GSM Simulated	https://www.ncbi.nlm.nih.gov/pubmed/31796670	UHF (300 MHz-3 GHz) studies	Funded by the PR 190 of French 530 Ministry of Ecology (MEDDTL).	0	1
3546	Whole-body exposures to radiofrequency-electromagnetic energy can cause DNA damage in mouse spermatozoa via an oxidative mechanism	Houston BJ, Nixon B, McEwan KE, Martin JH, King BV, Aitken RJ, De Iuliis GN.	2019-11-25	Effect	Not Stated		1	RF Signal Generator and Transverse Electromagnetic (TEM) Cell	https://www.ncbi.nlm.nih.gov/pubmed/31767903	UHF (300 MHz-3 GHz) studies	This research was supported by a National Health and Medical Research Council of Australia Project Grant (APP1156997) to G.N.D., B.N., B.V.K. and R.J.A. and B.H. was the recipient of an Australian Postgraduate Award scholarship.	0	1
3552	Effects of Wi-Fi Radiation on Germination and Growth of Brocco- li, Pea, Red Clover and Garden Cress Seedlings: A Partial Replication Study	Havas M, Symington MS.	2016-07-01	Effect	Pulsed	Real		WiFi	https://www.researchgate.net/publication/305691264_Effects_of_Wi-Fi_Radiation_on_Germination_and_Growth_of_Broccoli_Pea_Red_Clover_and_Garden_Cress_Seedlings_A_Partial_Replication_Study	UHF (300 MHz-3 GHz) studies	Funded by author	0	1
3553	Effect of Mobile Phone Microwaves on Fetal Period of BALB/ c Mice in Histological Characteristics of Hippocampus and Learning Behaviors	Ali Moghimi A, J Baharara J, Musavi SS.	2009-09-01	Effect	Pulsed			Transverse Electromagnetic (TEM) Cell	https://www.researchgate.net/publication/38111513_Effect_of_Mobile_Phone_Microwaves_on_Fetal_Period_of_BALBc_Mice_in_Histological_Characteristics_of_Hippocampus_and_Learning_Behaviors	UHF (300 MHz-3 GHz) studies	Vice Chancellor for Research of Islamic Azad University, Mashhad branch, for providing financial support to perform this research.	0	1
3554	GSM 900 MHz Microwave Radiation- Induced Alterations of Insulin Level and Histopathological Changes of Liver and Pancreas in Rat	Mortazavi SM, Owji SM, Shojaei-Fard MB, Ghader-Panah M, Mortazavi SA, Tavakoli-Golpayegani A, Haghani M, Taeb S, Shokrpour N, Koohi O.	2016-12-01	Effect	Pulsed	Real		Mobile Phone GSM (Talk)	https://www.ncbi.nlm.nih.gov/pubmed/28144593	UHF (300 MHz-3 GHz) studies	Center for Research in Radiation Sciences (CRRS). No conflict of interest declaration.	0	1
3557	Effect of electromagnetic radiation from mobile phone on the levels of cortical amino acid neurotransmitters in adult and young rats.	Khadrawy Y, Ahmed NA, Aboul Ezz, HS, Radwan NM.	2009-12-01	Effect	Not Stated			Simulated by a signal generator	https://www.researchgate.net/publication/235606337_Effect_of_electromagnetic_radiation_from_mobile_phone_on_the_levels_of_cortical_amino_acid_neurotransmitters_in_adult_and_young_rats	UHF (300 MHz-3 GHz) studies	This study is part of a project entitled "A Study on The Influence of Mobile Phone Radiation on Some Functions of Central Nervous System" granted by Sector of "International Cooperation with USA", Foreign Ministry, Egypt.	0	1
3561	Survey of the Effects of Exposure to 900 MHz Radiofrequency Radiation Emitted by a GSM Mobile Phone on the Pattern of Muscle Contractions in an Animal Model	Mortazavi SM, Rahimi S, Talebi A, Soleimani A, Rafati A.	2015-09-01	Effect	Pulsed	Real		Mobile Phone GSM	https://www.ncbi.nlm.nih.gov/pubmed/26396968	UHF (300 MHz-3 GHz) studies	This study was supported by the Ionizing and Non-ionizing Radiation Protection Re- search Center (INIRPRC), Shiraz University of Medical Sciences (SUMS), Shiraz, Iran.	0	1
3597	Effects of Electromagnetic Radiations from Mobile Phone on Gingiva in the Era of 4G LTE-An In Vivo Study in Rabbits	Sirajuddin S, Kripal K, Chandrasekaran K, Anuroopa P.	2010-10-01	Uncertain Effect	Pulsed	Real		Mobile Phone GSM	https://www.longdom.org/open-access/effects-of-electromagnetic-radiations-from-mobile-phone-on-gingiva-in-the-era-of-4g-ltean-in-vivo-study-in-rabbits-2161-1122-1000518.pdf	UHF (300 MHz-3 GHz) studies	Self funded. No conflict of interest	0	1
3607	Induction of Poly(ADP-ribose) Polymerase in Mouse Bone Marrow Stromal Cells Exposed to 900 MHz Radiofrequency Fields: Preliminary Observations	He Q, Sun Y, Zong L, Tong J, Cao Y	2016-03-27	Effect	Not Stated			Gigahertz Transverse Electromagnetic (TEM) Cell	https://pubmed.ncbi.nlm.nih.gov/27190989/	UHF (300 MHz-3 GHz) studies	National Natural Science Foundation of China (Grant no. 81373025) and Jiangsu Key Laboratory of Preventive and Translational Medicine for Geriatric Diseases. The authors are grateful to Dr. Vijayalaxmi	1	0
3617	Does radio frequency radiation induce micronuclei frequency in exfoliated bladder cells of diabetic rats?	Gurbuz N, Sirav B, Kuzay D, Ozer C, Seyhan N.	2015-07-01	No Effect	Not Stated			RF Signal Generator	https://www.ncbi.nlm.nih.gov/pubmed/26238494	UHF (300 MHz-3 GHz) studies	Not Stated	0	1
3618	Short-duration exposure to 2.45 GHz microwave radiation induces DNA damage in Sprague Dawley rat's reproductive systems	Usikalu M, Obembe OO, Akinyemi ML, Zhu J.	2013-02-01	Effect	Not Stated			RF Signal Generator	https://www.researchgate.net/publication/286935393_Short-duration_exposure_to_245_GHz_microwave_radiation_induces_DNA_damage_in_Sprague_Dawley_rat's_reproductive_systems	UHF (300 MHz-3 GHz) studies	Not Stated	0	1
3622	Brain tumour growth in rats exposed to electromagnetic fields used in wireless cellular communication	Persson BR, Malmgren L, Brun Arne, Salford L.	2014-03-01	No Effect	Continuous			Transverse Electromagnetic (TEM) Cell	https://www.researchgate.net/publication/260599025_Brain_tumour_growth_in_rats_exposed_to_electromagnetic_fields_used_in_wireless_cellular_communication	UHF (300 MHz-3 GHz) studies	Åke Wibergs foundation, Gunnar, Arvid and Elisabeth Nilssons foundation, The Crafoord Foundation and the Medical Faculty of the University of Lund is gratefully acknowledged.	1	0
3627	Biochemical Alterations as Markers of Mobile Phone Radiation in Mice	Reddy VB.	2017-03-01	Effect	Pulsed	Real	1	Mobile Phone GSM	https://www.rjpbcs.com/pdf/2017_8(2)/[197].pdf	UHF (300 MHz-3 GHz) studies	No stated	0	1
3630	Effect of mobile phone radiation on oxidative stress, inflammatory response, and contextual fear memory in Wistar rat	Singh KV, Gautam R, Meena R, Nirala JP, Jha SK, Rajamani P.	2020-03-24	Effect	Pulsed	Real	1	Mobile Phone GSM	https://www.ncbi.nlm.nih.gov/pubmed/32212071	UHF (300 MHz-3 GHz) studies	Council of Scientific and Industrial Research (CSIR, Award no. 09/263(1005)/2013-EMR-I), New Delhi for the fellowship	0	1
3644	Effect on the immune system of mice exposed chronically to 50Hz amplitude-modulated 2.45GHz microwaves	Elekes E, Thuróczy G, Szabó LD.	1996-01-01	Uncertain Effect	Amplitude Modulation	Simulated		Mobile Phone TD-SCDMA Simulated	https://www.ncbi.nlm.nih.gov/pubmed/8809365	UHF (300 MHz-3 GHz) studies	This research was supported by PHARE-ACCORD program	0	1
3648	Invitro effects of low intensity 1.8 GHz radiofrequency radiation on human peripheral blood leukocytes from healthy donors: A morphometric and morphological study	Jirillo E, Boffola S, Stefanelli R, Magrone T, Vitale E, Pappagallo MT, Lasalvia M, Perna G., Capozzi V, Ermini A, Ligonzo T, Schiavulli L, Biagi PF.	2014-05-01	Effect	Not Stated			Microwave Generator	https://www.semanticscholar.org/paper/In-vitro-Effects-of-Low-Intensity-1.8-Ghz-Radiation-Jirillo/21e1a845e1f93481d67500283b1f9fb48411d94d	UHF (300 MHz-3 GHz) studies	No conflict of Interest stated	1	0
3649	Effect of chronic microwave radiation on T cell-mediated immunity in the rabbit	Nageswari KS, Sarma KR, Rajvanshi VS, Sharan R, Sharma M, Barathwal V, Singh V.	1991-06-01	Effect	Continuous			Microwave	https://www.ncbi.nlm.nih.gov/pubmed/1743776	UHF (300 MHz-3 GHz) studies	National Radar Council, Department of Electronics and conducted for the project "Effects of acute and chronic microwave radiation on immunological systems", National Radar Council, Department of Electronics and conducted for the project "Effects of acute and chronic microwave radiation on immunological systems", EC/EE-(RS)/84~87/48.	0	1
3650	Effects of exposure to microwaves on cellular immunity and placental steroids in pregnant rats	Nakamura H, Seto T, Nagase H, Yoshida M, Dan S, Ogino K.	1997-09-01	Effect	Not Stated			Magnetron	https://www.ncbi.nlm.nih.gov/pubmed/9423582	UHF (300 MHz-3 GHz) studies	supported by grant from the Ministry of Education.	0	1
3657	Possible impact(s) of cell phone electromagnetic radiation on human sperm parameters	Mostafa R, Elmoemen EE, Elmoemen MS, Agres AM.	2012-06-01	Effect	Pulsed	Real	1	Mobile Phone GSM	https://www.researchgate.net/publication/271655909_Possible_impacts_of_cell_phone_electromagnetic_radiation_on_human_sperm_parameters	UHF (300 MHz-3 GHz) studies	No Conflict of Interest Stated	1	0
3658	The Immunomodulatory Effect of Radiofrequency Electromagnetic Field on Serum Cytokine Levels in A Mouse Model of Hindlimb Unloading	Aghajari S, Mortazavi SMJ, Kalani M, Nematolahi S, Habibzadeh P, Farjadian S.	2020-04-22	Effect	Pulsed	Real		WiFi	https://www.ncbi.nlm.nih.gov/pubmed/32347032	UHF (300 MHz-3 GHz) studies	M.Sc. degree in Radiobiology (Sima Aghajary), and financially supported by a grant from Shiraz University of Medical Sciences (grant number: 8736).	0	1
3663	Brain tumour development in rats exposed to electromagnetic fields used in wireless cellular communication	Salford LG, Brun A, Perrson BRR.	1997-12-01	No Effect	Pulsed			Transverse Electromagnetic (TEM) Cell	https://link.springer.com/article/10.1023/A:1019102627678	UHF (300 MHz-3 GHz) studies	No stated	0	1
[truncated: 238 more rows]

## Sheet: Epidemiology UHF
PaperID	Title	Authors	Date_Pub	Effect	Exposure	WLink	Freq_Cat	Funding
[truncated: 256 more rows]

## Sheet: Real vs Epidemiology graph
	Experimental real-world signals	Experimental	Epidemiological	Epidemiology
[truncated: 8 more rows]

[truncated: 1 more sheets: Effects categories graph]
